# Supplementary material for: Structural basis of host recognition and biofilm formation by Salmonella Saf pili
Source: eLife. 2017 Nov 10;6:e28619. doi: 10.7554/eLife.28619 (PMC5700814; doi:10.7554/eLife.28619)
Supplement: Figure 4—source data 1. — Cell adherence measured by OD450 absorance values (three replicates). [file elife-28619-fig4-data1.xlsx]

## Sheet: Sheet1
	Relative binding (Abs 450 nm) for control group
Time	0 min	0.5 min	15 min	60 min	90 min	120 min
Control (case 1)	0.0118	0.0019	0.008	0.0044	0.0011	0.0058
Control (case 2)	-0.0006	0.0066	0.0147	0.0071	0.0158	0.0109
Control (case 3)	-0.0072	0.0018	0.0192	0.0067	0.0132	0.0088
Mean	0.00133333	0.00343333	0.0139667	0.00606667	0.0100333	0.0085
S.E	0.00787627	0.00223954	0.00460169	0.00118977	0.00640538	0.00209284
	Relative binding (Abs 450 nm) for SafDAA-dsc group
Time	0 min	0.5 min	15 min	60 min	90 min	120 min
SafDAA-dsc (case 1)	0.0206	0.0898	0.1919	0.2439	0.2644	0.3325
SafDAA-dsc (case 2)	0.0006	0.0551	0.0947	0.2069	0.2421	0.2992
SafDAA-dsc (case 3)	-0.0006	0.0662	0.1525	0.2359	0.2505	0.3562
Mean	0.00686667	0.0703667	0.146367	0.2289	0.252333	0.3293
S.E	0.00972328	0.0144694	0.039918	0.0158955	0.00919577	0.0233799
