# Supplementary material for: Structural basis of host recognition and biofilm formation by Salmonella Saf pili
Source: eLife. 2017 Nov 10;6:e28619. doi: 10.7554/eLife.28619 (PMC5700814; doi:10.7554/eLife.28619)
Supplement: Figure 4—source data 2. — Cell adherence for SafDAA-dsc and mutants measured by OD450 absorance values (three replicates). [file elife-28619-fig4-data2.xlsx]

## Sheet: Sheet1
	Relative binding (Abs 450 nm) for each group
	Control	SafDAA-dsc	SafDA-dsc	SafD-dsc	SafA-dsc	SafAA-dsc
Case 1	0.0266	0.3859	0.0713	0.0136	0.0136	0.0055
Case 2	0.0192	0.3949	0.1045	0.0303	0.0274	0.0329
Case 3	0.0083	0.3605	0.0809	0.0274	0.0304	0.0225
Mean	0.0180333	0.380433	0.0855667	0.0237667	0.0238	0.0203
S.E	0.00751635	0.014566	0.0139498	0.00728575	0.00731574	0.0112937
