# Supplementary material for: Structural basis of host recognition and biofilm formation by Salmonella Saf pili
Source: eLife. 2017 Nov 10;6:e28619. doi: 10.7554/eLife.28619 (PMC5700814; doi:10.7554/eLife.28619)
Supplement: Figure 5—figure supplement 1—source data 1. — Beads aggregation was qauntified by the observation of bead clusters, of which the number of beads (n) was ≥3. Values are means ±S.E. from three independent experiments. [file elife-28619-fig5-figsupp1-data1.xlsx]

## Sheet: Sheet1
	Beads aggregation numbers
	BSA	SafDAA-dsc	SafD-dsc	SafA-dsc
Case 1	5	49	12	9
Case 2	8	40	8	10
Case 3	9	45	7	6
Mean	7.33333	44.6667	9	8.33333
S.E	2.08167	4.50925	2.64575	2.08167
