# Supplementary material for: Structural basis of host recognition and biofilm formation by Salmonella Saf pili
Source: eLife. 2017 Nov 10;6:e28619. doi: 10.7554/eLife.28619 (PMC5700814; doi:10.7554/eLife.28619)
Supplement: Figure 5—source data 1. — SAXS data were recorded a X-ray beam with the wavelength of 1.03 Å (BL19U2, SSRF, China). [file elife-28619-fig5-data1.xls]

## Sheet: Sheet1
	Intensity (Log)
q	Experimental	Crystalographic
0.00943	42.89	33.02
0.00982	43	33.02
0.01021	39.9	33.02
0.01061	39.72	33.02
0.011	38.18	33.02
0.01139	36.37	33.02
0.01178	37.04	33.02
0.01218	36.59	33.02
0.01257	36.44	32.97
0.01296	35.23	32.78
0.01336	33.99	32.58
0.01375	34.09	32.37
0.01414	33.55	32.17
0.01453	33.39	31.97
0.01493	33.36	31.76
0.01532	32.86	31.54
0.01571	31.46	31.31
0.01611	31.45	31.09
0.0165	31.78	30.86
0.01689	30.64	30.63
0.01728	30.39	30.41
0.01768	30.57	30.17
0.01807	29.9	29.93
0.01846	29.91	29.68
0.01886	29.15	29.44
0.01925	29.3	29.19
0.01964	28.63	28.95
0.02003	28.43	28.7
0.02043	28.29	28.44
0.02082	27.26	28.19
0.02121	27.53	27.93
0.02161	27.44	27.67
0.022	26.95	27.41
0.02239	26.93	27.16
0.02278	26.46	26.89
0.02318	26.31	26.63
0.02357	26.17	26.37
0.02396	25.7	26.1
0.02436	25.01	25.84
0.02475	25.09	25.57
0.02514	24.96	25.31
0.02553	24.73	25.04
0.02593	24.37	24.78
0.02632	23.98	24.51
0.02671	23.77	24.24
0.02711	23.65	23.98
0.0275	23.29	23.71
0.02789	23.07	23.45
0.02828	22.65	23.19
0.02868	22.49	22.92
0.02907	22.47	22.66
0.02946	22.04	22.4
0.02985	22.04	22.13
0.03025	22.1	21.87
0.03064	21.34	21.62
0.03103	21.16	21.36
0.03143	20.98	21.1
0.03182	20.52	20.85
0.03221	20.43	20.59
0.0326	20.17	20.34
0.033	19.88	20.09
0.03339	19.68	19.85
0.03378	19.67	19.6
0.03418	19.38	19.35
0.03457	19.21	19.11
0.03496	19.2	18.86
0.03535	18.8	18.62
0.03575	18.62	18.39
0.03614	18.31	18.16
0.03653	18	17.92
0.03693	18.21	17.69
0.03732	17.8	17.46
0.03771	17.48	17.23
0.0381	17.17	17.01
0.0385	16.93	16.79
0.03889	16.74	16.57
0.03928	16.63	16.35
0.03968	16.28	16.13
0.04007	16.1	15.92
0.04046	15.75	15.71
0.04085	15.65	15.51
0.04125	15.68	15.31
0.04164	15.26	15.1
0.04203	15.12	14.9
0.04242	14.93	14.69
0.04282	14.75	14.5
0.04321	14.44	14.32
0.0436	14.45	14.13
0.044	14.12	13.94
0.04439	13.97	13.75
0.04478	13.76	13.57
0.04517	13.52	13.39
0.04557	13.69	13.21
0.04596	13.29	13.04
0.04635	13.07	12.87
0.04675	12.92	12.7
0.04714	12.74	12.53
0.04753	12.57	12.36
0.04792	12.54	12.2
0.04832	12.38	12.05
0.04871	12.29	11.89
0.0491	11.87	11.74
0.0495	11.8	11.58
0.04989	11.61	11.43
0.05028	11.54	11.28
0.05067	11.48	11.14
0.05107	11.43	11
0.05146	11.18	10.86
0.05185	10.81	10.72
0.05224	10.77	10.58
0.05264	10.72	10.45
0.05303	10.47	10.32
0.05342	10.31	10.19
0.05382	10.32	10.07
0.05421	10.07	9.943
0.0546	9.906	9.817
0.05499	9.788	9.692
0.05539	9.684	9.578
0.05578	9.698	9.465
0.05617	9.43	9.352
0.05657	9.276	9.24
0.05696	9.251	9.127
0.05735	9.177	9.014
0.05774	8.978	8.909
0.05814	8.902	8.808
0.05853	8.592	8.707
0.05892	8.639	8.606
0.05932	8.542	8.505
0.05971	8.641	8.405
0.0601	8.453	8.307
0.06049	8.408	8.216
0.06089	8.173	8.126
0.06128	8.225	8.036
0.06167	7.902	7.946
0.06206	7.778	7.856
0.06246	7.801	7.767
0.06285	7.841	7.684
0.06324	7.498	7.604
0.06364	7.399	7.523
0.06403	7.303	7.442
0.06442	7.165	7.362
0.06481	7.169	7.281
0.06521	7.068	7.205
0.0656	7.023	7.132
0.06599	6.727	7.06
0.06639	6.952	6.987
0.06678	6.639	6.915
0.06717	6.754	6.843
0.06756	6.688	6.772
0.06796	6.538	6.706
0.06835	6.396	6.641
0.06874	6.336	6.576
0.06913	6.419	6.51
0.06953	6.409	6.445
0.06992	6.069	6.38
0.07031	6.021	6.319
0.07071	6.076	6.26
0.0711	5.914	6.201
0.07149	5.816	6.142
0.07188	5.744	6.082
0.07228	5.908	6.023
0.07267	5.672	5.966
0.07306	5.604	5.912
0.07346	5.705	5.858
0.07385	5.696	5.804
0.07424	5.423	5.75
0.07463	5.445	5.695
0.07503	5.302	5.642
0.07542	5.235	5.592
0.07581	5.232	5.542
0.0762	4.979	5.492
0.0766	5.161	5.442
0.07699	5.264	5.392
0.07738	4.969	5.342
0.07778	5.132	5.295
0.07817	4.998	5.248
0.07856	4.93	5.202
0.07895	4.834	5.156
0.07935	4.896	5.109
0.07974	4.859	5.063
0.08013	4.788	5.017
0.08052	4.67	4.974
0.08092	4.507	4.93
0.08131	4.818	4.887
0.0817	4.62	4.843
0.0821	4.515	4.8
0.08249	4.541	4.757
0.08288	4.402	4.715
0.08327	4.445	4.674
0.08367	4.315	4.633
0.08406	4.401	4.592
0.08445	4.308	4.551
0.08485	4.228	4.51
0.08524	4.28	4.47
0.08563	4.26	4.431
0.08602	4.23	4.392
0.08642	3.977	4.353
0.08681	3.969	4.314
0.0872	4.01	4.275
0.08759	4.011	4.237
0.08799	4.001	4.2
0.08838	3.839	4.163
0.08877	3.837	4.125
0.08917	3.887	4.088
0.08956	3.815	4.051
0.08995	3.895	4.014
0.09034	3.864	3.978
0.09074	3.894	3.943
0.09113	3.846	3.908
0.09152	3.478	3.872
0.09191	3.594	3.837
0.09231	3.517	3.801
0.0927	3.739	3.767
0.09309	3.738	3.733
0.09349	3.594	3.699
0.09388	3.468	3.665
0.09427	3.45	3.632
0.09466	3.62	3.598
0.09506	3.47	3.565
0.09545	3.437	3.532
0.09584	3.189	3.5
0.09623	3.345	3.468
0.09663	3.309	3.436
0.09702	3.231	3.404
0.09741	3.095	3.372
0.09781	3.495	3.341
0.0982	3.336	3.311
0.09859	3.02	3.281
0.09898	3.203	3.25
0.09938	3.228	3.22
0.09977	3.243	3.19
0.1002	3.08	3.16
0.1006	3.201	3.132
0.1009	3.072	3.103
0.1013	3.096	3.075
0.1017	3.049	3.046
0.1021	2.937	3.018
0.1025	3.072	2.99
0.1029	2.821	2.963
0.1033	2.878	2.936
0.1037	2.986	2.91
0.1041	2.936	2.883
0.1045	3.047	2.857
0.1049	2.728	2.83
0.1053	2.783	2.805
0.1057	2.881	2.78
0.1061	2.836	2.755
0.1064	2.782	2.731
0.1068	2.986	2.706
0.1072	2.866	2.682
0.1076	2.675	2.658
0.108	2.61	2.635
0.1084	2.655	2.612
0.1088	2.71	2.59
0.1092	2.662	2.567
0.1096	2.652	2.544
0.11	2.729	2.522
0.1104	2.47	2.501
0.1108	2.475	2.48
0.1112	2.584	2.459
0.1115	2.655	2.439
0.1119	2.469	2.418
0.1123	2.469	2.397
0.1127	2.531	2.378
0.1131	2.514	2.359
0.1135	2.506	2.34
0.1139	2.522	2.321
0.1143	2.487	2.302
0.1147	2.43	2.283
0.1151	2.241	2.264
0.1155	2.392	2.247
0.1159	2.423	2.23
0.1163	2.357	2.213
0.1167	2.42	2.195
0.117	2.454	2.178
0.1174	2.24	2.161
0.1178	2.321	2.145
0.1182	2.268	2.129
0.1186	2.213	2.113
0.119	2.182	2.098
0.1194	2.351	2.082
0.1198	2.329	2.066
0.1202	2.242	2.051
0.1206	2.154	2.036
0.121	2.213	2.022
0.1214	2.165	2.007
0.1218	2.168	1.993
0.1222	1.967	1.978
0.1225	2.087	1.964
0.1229	2.182	1.95
0.1233	2.092	1.937
0.1237	2.112	1.923
0.1241	1.932	1.91
0.1245	1.975	1.896
0.1249	1.967	1.883
0.1253	2.036	1.87
0.1257	1.976	1.857
0.1261	2.052	1.844
0.1265	1.973	1.831
0.1269	1.891	1.819
0.1273	1.934	1.806
0.1276	1.763	1.793
0.128	1.94	1.781
0.1284	1.955	1.769
0.1288	1.882	1.757
0.1292	1.947	1.744
0.1296	1.961	1.732
0.13	1.921	1.72
0.1304	1.774	1.708
0.1308	1.878	1.696
0.1312	1.727	1.684
0.1316	1.707	1.673
0.132	1.839	1.661
0.1324	1.837	1.649
0.1328	1.776	1.637
0.1331	1.786	1.625
0.1335	1.865	1.614
0.1339	1.734	1.602
0.1343	1.669	1.59
0.1347	1.681	1.579
0.1351	1.703	1.567
0.1355	1.684	1.555
0.1359	1.672	1.544
0.1363	1.604	1.532
0.1367	1.628	1.521
0.1371	1.655	1.509
0.1375	1.647	1.497
0.1379	1.579	1.486
0.1382	1.58	1.474
0.1386	1.576	1.463
0.139	1.601	1.451
0.1394	1.57	1.44
0.1398	1.476	1.428
0.1402	1.483	1.416
0.1406	1.439	1.405
0.141	1.507	1.393
0.1414	1.53	1.382
0.1418	1.387	1.37
0.1422	1.465	1.359
0.1426	1.495	1.347
0.143	1.442	1.336
0.1434	1.401	1.324
0.1437	1.404	1.313
0.1441	1.374	1.301
0.1445	1.397	1.29
0.1449	1.29	1.278
0.1453	1.406	1.267
0.1457	1.351	1.256
0.1461	1.415	1.244
0.1465	1.355	1.233
0.1469	1.571	1.221
0.1473	1.333	1.21
0.1477	1.355	1.199
0.1481	1.37	1.188
0.1485	1.18	1.176
0.1488	1.403	1.165
0.1492	1.287	1.154
0.1496	1.359	1.143
0.15	1.27	1.132
0.1504	1.15	1.121
0.1508	1.214	1.11
0.1512	1.222	1.099
0.1516	1.246	1.088
0.152	1.14	1.077
0.1524	1.129	1.067
0.1528	1.054	1.056
0.1532	1.125	1.045
0.1536	1.136	1.035
0.154	1.165	1.025
0.1543	1.144	1.014
0.1547	1.086	1.004
0.1551	1.046	0.9933
0.1555	1.039	0.9833
0.1559	0.9586	0.9733
0.1563	1.109	0.9633
0.1567	1.189	0.9533
0.1571	1.074	0.9433
0.1575	1.132	0.9333
0.1579	1.026	0.9238
0.1583	1.029	0.9144
0.1587	1.143	0.9049
0.1591	1.018	0.8955
0.1594	0.9483	0.886
0.1598	0.9665	0.8766
0.1602	1.002	0.8675
0.1606	0.9936	0.8587
0.161	0.921	0.8499
0.1614	1.018	0.841
0.1618	0.9124	0.8322
0.1622	0.8713	0.8234
0.1626	0.9419	0.8147
0.163	0.9643	0.8065
0.1634	0.9275	0.7983
0.1638	0.8586	0.7901
0.1642	0.9383	0.7819
0.1646	0.7374	0.7737
0.1649	0.765	0.7656
0.1653	0.8043	0.7579
0.1657	0.9794	0.7504
0.1661	0.7956	0.7429
0.1665	0.8907	0.7353
0.1669	0.938	0.7278
0.1673	0.767	0.7203
0.1677	0.7667	0.713
0.1681	0.8659	0.7061
0.1685	0.675	0.6992
0.1689	0.8071	0.6923
0.1693	0.7786	0.6854
0.1697	0.7114	0.6785
0.17	0.7874	0.6718
0.1704	0.765	0.6654
0.1708	0.6399	0.6592
0.1712	0.8256	0.6529
0.1716	0.6827	0.6466
0.172	0.641	0.6403
0.1724	0.6953	0.6341
0.1728	0.803	0.6282
0.1732	0.6781	0.6225
0.1736	0.6202	0.6168
0.174	0.7781	0.611
0.1744	0.6469	0.6053
0.1748	0.7741	0.5996
0.1751	0.7006	0.5941
0.1755	0.673	0.5889
0.1759	0.8055	0.5837
0.1763	0.4752	0.5785
0.1767	0.7738	0.5733
0.1771	0.5841	0.5681
0.1775	0.6398	0.563
0.1779	0.7495	0.5582
0.1783	0.5387	0.5534
0.1787	0.5604	0.5487
0.1791	0.5763	0.5439
0.1795	0.6265	0.5392
0.1799	0.5685	0.5344
0.1802	0.4902	0.5299
0.1806	0.7171	0.5256
0.181	0.5683	0.5212
0.1814	0.5623	0.5169
0.1818	0.5662	0.5125
0.1822	0.5676	0.5082
0.1826	0.4937	0.5039
0.183	0.6225	0.4999
0.1834	0.5216	0.4958
0.1838	0.5649	0.4918
0.1842	0.6401	0.4878
0.1846	0.5705	0.4838
0.185	0.5285	0.4798
0.1854	0.5156	0.4759
0.1857	0.4184	0.4722
0.1861	0.5934	0.4684
0.1865	0.484	0.4647
0.1869	0.5709	0.4609
0.1873	0.4837	0.4572
0.1877	0.4634	0.4535
0.1881	0.5756	0.45
0.1885	0.4415	0.4464
0.1889	0.3663	0.4429
0.1893	0.5294	0.4394
0.1897	0.4361	0.4358
0.1901	0.5844	0.4323
0.1905	0.4115	0.4289
0.1908	0.4251	0.4255
0.1912	0.5489	0.4222
0.1916	0.6039	0.4188
0.192	0.4755	0.4154
0.1924	0.4751	0.4121
0.1928	0.4318	0.4088
0.1932	0.4477	0.4055
0.1936	0.5558	0.4023
0.194	0.4521	0.3991
0.1944	0.4017	0.3958
0.1948	0.4476	0.3926
0.1952	0.4167	0.3894
0.1956	0.4167	0.3862
0.1959	0.4043	0.3831
0.1963	0.3891	0.38
0.1967	0.5249	0.3768
0.1971	0.3887	0.3737
0.1975	0.3044	0.3706
0.1979	0.392	0.3675
0.1983	0.3365	0.3644
0.1987	0.3364	0.3614
0.1991	0.3058	0.3583
0.1995	0.3754	0.3553
0.1999	0.3304	0.3522
0.2003	0.4912	0.3492
0.2007	0.505	0.3462
0.201	0.4536	0.3432
0.2014	0.4689	0.3402
0.2018	0.3952	0.3372
0.2022	0.2471	0.3342
0.2026	0.3582	0.3313
0.203	0.3775	0.3283
0.2034	0.3194	0.3254
0.2038	0.308	0.3225
0.2042	0.3436	0.3195
0.2046	0.3554	0.3166
0.205	0.1788	0.3137
0.2054	0.465	0.3108
0.2058	0.2601	0.3079
0.2061	0.297	0.3051
0.2065	0.2995	0.3022
0.2069	0.4453	0.2993
0.2073	0.2185	0.2965
0.2077	0.27	0.2936
0.2081	0.2167	0.2908
0.2085	0.1773	0.288
0.2089	0.2975	0.2852
0.2093	0.3981	0.2825
0.2097	0.3821	0.2797
0.2101	0.3404	0.2769
0.2105	0.2474	0.2742
0.2109	0.3456	0.2714
0.2112	0.3657	0.2687
0.2116	0.3312	0.266
0.212	0.2075	0.2633
0.2124	0.288	0.2606
0.2128	0.3117	0.2579
0.2132	0.1478	0.2553
0.2136	0.1858	0.2527
0.214	0.2535	0.25
0.2144	0.343	0.2474
0.2148	0.3515	0.2448
0.2152	0.3816	0.2422
0.2156	0.2154	0.2397
0.216	0.2942	0.2372
0.2163	0.1297	0.2346
0.2167	0.2145	0.2321
0.2171	0.2369	0.2296
0.2175	0.2461	0.2271
0.2179	0.09584	0.2247
0.2183	0.2889	0.2223
0.2187	0.3349	0.2199
0.2191	0.2429	0.2175
0.2195	0.2686	0.2151
0.2199	0.2303	0.2127
0.2203	0.1652	0.2104
0.2207	0.2098	0.2081
0.2211	0.3503	0.2059
0.2214	0.2749	0.2036
0.2218	0.1734	0.2013
0.2222	0.3242	0.1991
0.2226	0.1981	0.1968
0.223	0.1797	0.1947
0.2234	0.2325	0.1926
0.2238	0.2378	0.1905
0.2242	0.2133	0.1883
0.2246	0.126	0.1862
0.225	0.08129	0.1841
0.2254	0.2375	0.1821
0.2258	0.3185	0.1802
0.2262	0.2257	0.1782
0.2265	0.05593	0.1762
0.2269	0.1426	0.1742
0.2273	0.06349	0.1723
0.2277	0.1301	0.1704
0.2281	0.2582	0.1686
0.2285	0.06805	0.1668
0.2289	0.2443	0.165
0.2293	0.2544	0.1632
0.2297	0.2931	0.1613
0.2301	0.2213	0.1596
0.2305	0.302	0.1579
0.2309	0.2743	0.1562
0.2313	0.1846	0.1546
0.2316	0.1469	0.1529
0.232	0.1905	0.1513
0.2324	0.1237	0.1496
0.2328	0.1907	0.1481
0.2332	0.1764	0.1466
0.2336	0.09153	0.1451
0.234	0.2264	0.1436
0.2344	0.1954	0.1421
0.2348	0.2836	0.1406
0.2352	0.2231	0.1392
0.2356	0.1755	0.1378
0.236	0.2195	0.1365
0.2363	0.2332	0.1351
0.2367	0.1953	0.1338
0.2371	0.04163	0.1324
0.2375	0.03814	0.1311
0.2379	0.1318	0.1298
0.2383	0.07731	0.1286
0.2387	0.2347	0.1274
0.2391	0.1643	0.1262
0.2395	0.02941	0.125
0.2399	0.2331	0.1238
0.2403	0.3486	0.1226
0.2407	0.1183	0.1216
0.2411	0.1608	0.1205
0.2414	0.1295	0.1194
0.2418	0.1898	0.1183
0.2422	0.2619	0.1172
0.2426	0.09805	0.1162
0.243	0.1337	0.1152
0.2434	0.2412	0.1142
0.2438	0.2843	0.1132
0.2442	0.1623	0.1123
0.2446	0.1646	0.1113
0.245	0.1661	0.1103
0.2454	0.08242	0.1095
0.2458	0.05059	0.1086
0.2462	0.2317	0.1077
0.2465	0.2803	0.1068
0.2469	0.03122	0.106
0.2473	0.1719	0.1051
0.2477	0.1556	0.1043
0.2481	0.0403	0.1035
0.2485	0.1432	0.1027
0.2489	0.04648	0.1019
0.2493	0.1446	0.1011
0.2497	0.2688	0.1003
0.2501	0.1985	0.09958
0.2505	-0.05752	0.09887
0.2509	0.07771	0.09816
0.2513	0.1848	0.09745
0.2516	-0.04356	0.09674
0.252	0.04198	0.09603
0.2524	0.09457	0.09532
0.2528	0.09096	0.09466
0.2532	0.1102	0.09401
0.2536	0.102	0.09336
0.254	0.04886	0.09271
0.2544	0.2642	0.09207
0.2548	0.09868	0.09142
0.2552	0.2155	0.09079
0.2556	0.1201	0.0902
0.256	0.09084	0.0896
0.2563	0.1417	0.089
0.2567	0.2637	0.08841
0.2571	0.1949	0.08781
0.2575	-0.00534	0.08722
0.2579	0.097	0.08667
0.2583	0.3211	0.08612
0.2587	0.04046	0.08556
0.2591	0.1245	0.08501
0.2595	0.05708	0.08446
0.2599	0.1009	0.08391
0.2603	0.08812	0.08338
0.2607	0.1731	0.08287
0.2611	0.05928	0.08235
0.2614	0.02276	0.08184
0.2618	0.01895	0.08132
0.2622	0.1283	0.08081
0.2626	0.03896	0.08031
0.263	0.00197	0.07982
0.2634	0.1572	0.07934
0.2638	0.1614	0.07886
0.2642	0.1472	0.07838
0.2646	0.2727	0.0779
0.265	0.02163	0.07742
0.2654	0.0269	0.07697
0.2658	0.01533	0.07652
0.2661	0.07205	0.07607
0.2665	0.01527	0.07562
0.2669	0.07905	0.07517
0.2673	0.1082	0.07472
0.2677	-0.03155	0.07429
0.2681	0.01615	0.07387
0.2685	-0.03428	0.07345
0.2689	0.07718	0.07303
0.2693	0.1804	0.07262
0.2697	0.1785	0.0722
0.2701	-0.0214	0.07179
0.2705	0.06967	0.0714
0.2709	-0.00682	0.07101
0.2712	-0.01673	0.07062
0.2716	0.2392	0.07024
0.272	0.1345	0.06985
0.2724	0.09609	0.06946
0.2728	0.09473	0.0691
0.2732	0.03053	0.06875
0.2736	0.2042	0.06839
0.274	0.03771	0.06804
0.2744	0.05626	0.06768
0.2748	0.05894	0.06733
0.2752	0.2854	0.06699
0.2756	0.1542	0.06667
0.2759	0.06225	0.06635
0.2763	0.1119	0.06603
0.2767	0.1093	0.06571
0.2771	0.02818	0.0654
0.2775	0.1685	0.06508
0.2779	0.03663	0.0648
0.2783	0.1678	0.06452
0.2787	0.08727	0.06424
0.2791	0.07921	0.06396
0.2795	0.1986	0.06368
0.2799	0.04696	0.0634
0.2803	0.289	0.06315
0.2806	0.1556	0.06291
0.281	-0.03831	0.06267
0.2814	-0.01179	0.06243
0.2818	0.04474	0.06219
0.2822	0.1876	0.06195
0.2826	0.1605	0.06172
0.283	0.05434	0.06153
0.2834	-0.00659	0.06133
0.2838	0.1944	0.06113
0.2842	0.126	0.06094
0.2846	0.1078	0.06074
0.285	0.05537	0.06055
0.2854	0.1287	0.06039
0.2857	0.09704	0.06024
0.2861	0.09252	0.06009
0.2865	0.06997	0.05994
0.2869	0.08042	0.05978
0.2873	0.1526	0.05963
0.2877	0.1071	0.0595
0.2881	0.07091	0.0594
0.2885	0.03287	0.05929
0.2889	0.00177	0.05918
0.2893	0.2212	0.05908
0.2897	-0.0094	0.05897
0.2901	0.1523	0.05887
0.2904	0.1276	0.05881
0.2908	0.03814	0.05875
0.2912	0.1651	0.05868
0.2916	0.1063	0.05862
0.292	0.06086	0.05856
0.2924	0.1042	0.0585
0.2928	-0.07824	0.05847
0.2932	0.03537	0.05845
0.2936	0.257	0.05843
0.294	0.1419	0.05841
0.2944	0.1017	0.05839
0.2948	0.1315	0.05837
0.2951	0.062	0.05836
0.2955	0.1846	0.05838
0.2959	0.02054	0.0584
0.2963	0.06182	0.05842
0.2967	0.04713	0.05844
0.2971	0.2056	0.05846
0.2975	-0.05852	0.05849
0.2979	0.1518	0.05854
0.2983	-0.03273	0.05859
0.2987	0.1722	0.05865
0.2991	0.2122	0.0587
0.2995	0.1092	0.05876
0.2998	0.1763	0.05881
0.3002	0.02718	0.05889
0.3006	-0.04433	0.05897
0.301	0.08344	0.05906
0.3014	0.01257	0.05915
0.3018	0.1161	0.05923
C	-0.00747	0.05932
0.3026	0.1221	0.05941
0.303	0.1855	0.05952
0.3034	0.0431	0.05963
0.3038	0.03517	0.05975
0.3042	0.09049	0.05986
0.3045	0.07295	0.05997
0.3049	0.07631	0.06008
0.3053	-0.05992	0.06021
0.3057	-0.00154	0.06034
0.3061	0.1965	0.06047
0.3065	0.06734	0.0606
0.3069	0.02667	0.06073
0.3073	0.0266	0.06087
0.3077	0.3426	0.061
0.3081	0.1197	0.06115
0.3085	0.1061	0.06129
0.3089	0.162	0.06144
0.3092	0.00147	0.06158
0.3096	0.03839	0.06173
0.31	0.1013	0.06187
0.3104	0.2522	0.06203
0.3108	0.07202	0.06218
0.3112	0.1601	0.06233
0.3116	-0.05168	0.06249
0.312	0.2186	0.06264
0.3124	0.07372	0.06279
0.3128	0.1538	0.06295
0.3132	0.02135	0.06311
0.3136	0.08415	0.06326
0.3139	0.1483	0.06342
0.3143	0.1358	0.06358
0.3147	0.02843	0.06374
0.3151	0.02705	0.06389
0.3155	0.225	0.06405
0.3159	0.2148	0.0642
0.3163	0.1656	0.06436
0.3167	0.1171	0.06452
0.3171	-0.04626	0.06467
0.3175	0.00615	0.06483
0.3179	0.3267	0.06498
0.3183	0.0631	0.06514
0.3186	0.02427	0.06529
0.319	0.1133	0.06544
0.3194	0.05222	0.06559
0.3198	-0.1097	0.06575
0.3202	0.1515	0.0659
0.3206	0.09944	0.06604
0.321	0.1508	0.06619
0.3214	0.1465	0.06634
0.3218	0.06818	0.06648
0.3222	0.00393	0.06663
0.3226	0.07039	0.06677
0.323	0.1709	0.06691
0.3233	0.2001	0.06705
0.3237	0.1398	0.06719
0.3241	0.2021	0.06733
0.3245	0.06058	0.06747
0.3249	0.1867	0.06761
0.3253	0.1608	0.06774
0.3257	0.00036	0.06787
0.3261	0.03035	0.06801
0.3265	0.1335	0.06814
0.3269	0.07966	0.06827
0.3273	0.07033	0.0684
0.3277	0.05148	0.06853
0.328	0.2741	0.06865
0.3284	0.1318	0.06878
0.3288	0.2294	0.0689
0.3292	0.1031	0.06903
0.3296	-0.02516	0.06915
0.33	0.06582	0.06927
0.3304	0.07432	0.06939
0.3308	-0.02921	0.06951
0.3312	0.228	0.06963
0.3316	0.0784	0.06975
0.332	-0.02098	0.06987
0.3324	0.05254	0.06998
0.3327	0.06043	0.0701
0.3331	0.2132	0.07021
0.3335	0.1501	0.07033
0.3339	0.1347	0.07044
0.3343	0.05955	0.07055
0.3347	0.05661	0.07067
0.3351	0.1886	0.07078
0.3355	0.213	0.07089
0.3359	0.0596	0.071
0.3363	0.1677	0.07111
0.3367	0.0657	0.07122
0.3371	-0.02131	0.07134
0.3374	0.03941	0.07145
0.3378	0.1271	0.07156
0.3382	0.1281	0.07167
0.3386	0.06604	0.07178
0.339	-0.01032	0.07189
0.3394	0.1256	0.072
0.3398	0.06181	0.07211
0.3402	0.01678	0.07222
0.3406	0.171	0.07233
0.341	0.1938	0.07245
0.3414	0.1371	0.07256
0.3417	0.1332	0.07267
0.3421	-0.0878	0.07278
0.3425	0.08859	0.07289
0.3429	0.09878	0.07301
0.3433	0.1287	0.07312
0.3437	0.1274	0.07324
0.3441	0.1835	0.07335
0.3445	0.1673	0.07347
0.3449	0.06694	0.07358
0.3453	0.05547	0.0737
0.3457	0.177	0.07382
0.3461	0.03414	0.07394
0.3464	0.1747	0.07406
0.3468	0.1583	0.07418
0.3472	0.1984	0.0743
0.3476	0.05393	0.07442
0.348	0.1204	0.07455
0.3484	0.1531	0.07467
0.3488	0.00721	0.0748
0.3492	0.09822	0.07492
0.3496	0.1416	0.07505
0.35	0.1198	0.07518
0.3504	0.1511	0.07531
0.3508	0.1459	0.07544
0.3511	0.09954	0.07557
0.3515	0.316	0.0757
0.3519	0.06168	0.07583
0.3523	0.02273	0.07596
0.3527	0.1715	0.0761
0.3531	0.1238	0.07623
0.3535	0.1018	0.07637
0.3539	0.1387	0.07651
0.3543	0.04931	0.07664
0.3547	0.05908	0.07678
0.3551	0.2149	0.07692
0.3554	0.1092	0.07706
0.3558	0.07335	0.0772
0.3562	0.09046	0.07735
0.3566	0.1071	0.07749
0.357	0.127	0.07763
0.3574	0.1668	0.07777
0.3578	0.05217	0.07792
0.3582	0.08765	0.07806
0.3586	0.1475	0.07821
0.359	0.102	0.07836
0.3594	0.02196	0.0785
0.3598	0.03032	0.07865
0.3601	0.05797	0.0788
0.3605	0.2529	0.07895
0.3609	0.03607	0.0791
0.3613	0.1481	0.07924
0.3617	0.1117	0.07939
0.3621	0.2932	0.07954
0.3625	0.1056	0.07969
0.3629	-0.03073	0.07984
0.3633	0.2159	0.07999
0.3637	-0.0097	0.08014
0.3641	0.2035	0.08029
0.3644	0.06601	0.08044
0.3648	-0.03753	0.08059
0.3652	0.1705	0.08074
0.3656	0.1446	0.08089
0.366	-0.07429	0.08104
0.3664	0.04806	0.08118
0.3668	0.06606	0.08133
0.3672	0.0187	0.08148
0.3676	0.04151	0.08163
0.368	0.1819	0.08177
0.3684	0.0341	0.08192
0.3688	0.1149	0.08206
0.3691	-0.0486	0.08221
0.3695	0.06442	0.08235
0.3699	0.02133	0.08249
0.3703	0.129	0.08263
0.3707	0.1141	0.08277
0.3711	0.2202	0.08291
0.3715	0.2004	0.08305
0.3719	0.05714	0.08319
0.3723	-0.00946	0.08332
0.3727	0.3133	0.08346
0.3731	0.05102	0.08359
0.3734	0.1594	0.08372
0.3738	0.2719	0.08385
0.3742	0.2126	0.08398
0.3746	0.0738	0.0841
0.375	0.2867	0.08423
0.3754	0.1155	0.08435
0.3758	-0.00532	0.08447
0.3762	0.09796	0.08459
0.3766	0.07401	0.08471
0.377	0.04267	0.08482
0.3774	0.1693	0.08494
0.3777	0.1128	0.08505
0.3781	-0.05553	0.08516
0.3785	0.04249	0.08526
0.3789	0.1177	0.08537
0.3793	0.1652	0.08547
0.3797	0.1525	0.08558
0.3801	0.08435	0.08568
0.3805	0.2386	0.08577
0.3809	0.07605	0.08586
0.3813	0.2664	0.08595
0.3817	0.2195	0.08604
0.382	0.08163	0.08613
0.3824	-0.0033	0.08622
0.3828	0.1846	0.0863
