# Supplementary material for: Structural basis of host recognition and biofilm formation by Salmonella Saf pili
Source: eLife. 2017 Nov 10;6:e28619. doi: 10.7554/eLife.28619 (PMC5700814; doi:10.7554/eLife.28619)
Supplement: Figure 6—source data 1. — Elution volumes and estimatd molecular weights derived from SEC-MALS characterization for WT SafDAA-dsc and mutants. [file elife-28619-fig6-data1.xls]

## Sheet: MW
WT		E8A/Q10A		P20A		T7A/R9A/N94A
volume (ml)	MW	volume (ml)	MW	volume (ml)	MW	volume (ml)	MW
5.89004	-1290920	6.00152	127321	5.74149	261288	5.96147	120794
5.89846	-1700790	6.00994	125903	5.74991	255658	5.96989	119723
5.90688	-2880170	6.01835	123072	5.75833	249696	5.97831	120670
5.9153	-8876130	6.02677	119939	5.76674	243583	5.98673	123183
5.92371	7749210	6.03519	116980	5.77516	237394	5.99514	127573
5.93213	2792930	6.04361	114913	5.78358	230316	6.00356	133447
5.94055	1783730	6.05202	112918	5.792	223309	6.01198	139869
5.94897	1340320	6.06044	110232	5.80041	216553	6.0204	145544
5.95738	1098620	6.06886	107149	5.80883	210210	6.02881	149563
5.9658	957410	6.07728	106955	5.81725	204842	6.03723	145388
5.97422	867207	6.08569	112074	5.82566	200154	6.04565	133152
5.98263	806671	6.09411	120472	5.83408	195713	6.05406	123009
5.99105	775218	6.10253	129058	5.8425	191098	6.06248	116314
5.99947	760528	6.11094	133265	5.85092	186056	6.0709	111078
6.00789	757651	6.11936	129496	5.85933	181318	6.07932	105929
6.0163	757859	6.12778	122103	5.86775	177141	6.08773	101109
6.02472	751406	6.1362	117138	5.87617	173274	6.09615	97621.5
6.03314	745738	6.14461	113295	5.88459	169056	6.10457	94540.5
6.04156	741830	6.15303	109639	5.893	164097	6.11299	93228.9
6.04997	739721	6.16145	106318	5.90142	159553	6.1214	94297.9
6.05839	742837	6.16987	104441	5.90984	156164	6.12982	95654.2
6.06681	750871	6.17828	103163	5.91825	153318	6.13824	96396.8
6.60551	47270.2	6.1867	102277	5.92667	150611	6.14665	95847.1
6.61393	47551.3	6.19512	101265	5.93509	147816	6.15507	93400.5
6.62235	47870.2	6.20353	100006	5.94351	144608	6.16349	90182.3
6.63077	48215.4	6.21195	98746.4	5.95192	140929	6.17191	89425.9
6.63918	48592.5	6.22037	98051.4	5.96034	137006	6.18032	91196
6.6476	48937.8	6.22879	97270.6	5.96876	133656	6.18874	93248.1
6.65602	49261.8	6.6749	48442.9	5.97718	131094	6.63486	44669.2
6.66443	49563	6.68332	47986.6	5.98559	129073	6.64327	45370.9
6.67285	49782.3	6.69174	47801.7	5.99401	127496	6.65169	45844.6
6.68127	49928.3	6.70015	47854.5	6.00243	125837	6.66011	46147.6
6.68969	50028.9	6.70857	47993.4	6.01084	123716	6.66853	46252.3
6.6981	50127.4	6.71699	48137.9	6.01926	121154	6.67694	46413.4
6.70652	50343.8	6.72541	48276.7	6.02768	118401	6.68536	46854.9
6.71494	50391.3	6.73382	48415.5	6.0361	115803	6.69378	47333.6
6.72336	50373.4	6.74224	48437.6	6.04451	113182	6.7022	47595.6
6.73177	50294.1	6.75066	48345.7	6.05293	110520	6.71061	47730.9
6.74019	50330.7	6.75907	48210.2	6.06135	108077	6.71903	47820.9
6.74861	50228.9	6.76749	48074.8	6.06977	105983	6.72745	47898
6.75702	50123.1	6.77591	47957.7	6.07818	104129	6.73586	47975
6.76544	50020.3	6.78433	47888.9	6.0866	102825	6.74428	48056.1
6.77386	49891.9	6.79274	47894	6.09502	102393	6.7527	48115.5
6.78228	49817.9	6.80116	47942.7	6.10343	102187	6.76112	48424.1
6.79069	49696.5	6.80958	48081.3	6.11185	102186	6.76953	48487.4
6.79911	49534.9	6.818	47872.3	6.69264	48495.7	6.77795	48269.8
6.80753	49405.7	6.82641	47626.7	6.70106	48520	6.78637	48245.2
6.81595	49369.1	6.83483	47547.9	6.70948	48564.3	6.79479	48244.8
6.82436	49424.5	6.84325	47449.4	6.7179	48636.7	6.8032	48232
6.83278	49082.5	6.85166	47425.8	6.72631	48727.4	6.81162	48232.7
		6.86008	47399.1	6.73473	48788.4	6.82004	48239.7
		6.8685	47205.1	6.74315	48791.6	6.82845	48190.9
		6.87692	46962.1	6.75157	48767.2	6.83687	48137.9
		6.88533	46787.2	6.75998	48742.1	6.84529	48093.1
		6.89375	46626.6	6.7684	48737	6.85371	47984.5
		6.90217	46416.7	6.77682	48745.9	6.86212	47849
		6.91059	46138.4	6.78523	48740.2	6.87054	47794.7
		6.919	45796.1	6.79365	48727.7	6.87896	47774.4
		6.92742	45550.8	6.80207	48710	6.88738	47748.6
		6.93584	45511.9	6.81049	48708.1	6.89579	47720
		6.94425	45653.4	6.8189	48734	6.90421	47645.7
				6.82732	48783.9	6.91263	47730.7
				6.83574	48775.3	6.92104	48051
				6.84416	48670.4	6.92946	48345.1
				6.85257	48572.2	6.93788	48294.7
				6.86099	48499.1	6.9463	48058.3
				6.86941	48425.8	6.95471	46414.9
				6.87782	48354.2
				6.88624	48266.9
				6.89466	48160.7
				6.90308	48045.6
				6.91149	47894.7
				6.91991	47744.1
				6.92833	47634.5
				6.93675	47521.8
				6.94516	47392
				6.95358	47260
				6.962	46306.2
				6.94516	47392
				6.95358	47260
				6.962	46306.2

## Sheet: UV
DAA		E8A/Q10A		P20A		T7A/R9A/N94A
volume (ml)	UV	volume (ml)	UV	volume (ml)	UV	volume (ml)	UV
0.00637	0.000146867	0.00842	0.00214	0.00933	5.03879e-06	0.01046	0.000859413
0.01478	0.000170029	0.01683	0.00243	0.01774	1.01554e-05	0.01888	0.000996293
0.0232	0.000191251	0.02525	0.00269	0.02616	1.42119e-05	0.02729	0.00112
0.03162	0.000210059	0.03367	0.00292	0.03458	1.6469e-05	0.03571	0.00124
0.04004	0.000226069	0.04209	0.00313	0.04299	1.68455e-05	0.04413	0.00133
0.04845	0.000239227	0.0505	0.0033	0.05141	1.59054e-05	0.05254	0.00141
0.05687	0.00024986	0.05892	0.00345	0.05983	1.45814e-05	0.06096	0.00148
0.06529	0.000258543	0.06734	0.00358	0.06825	1.37036e-05	0.06938	0.00153
0.0737	0.000265852	0.07575	0.00368	0.07666	1.3609e-05	0.0778	0.00156
0.08212	0.000272183	0.08417	0.00376	0.08508	1.41013e-05	0.08621	0.00159
0.09054	0.000277708	0.09259	0.00383	0.0935	1.47233e-05	0.09463	0.00163
0.09896	0.000282427	0.10101	0.00389	0.10192	1.509e-05	0.10305	0.00168
0.10737	0.00028623	0.10942	0.00395	0.11033	1.50729e-05	0.11147	0.00177
0.11579	0.000288944	0.11784	0.00404	0.11875	1.47719e-05	0.11988	0.00189
0.12421	0.000290388	0.12626	0.00417	0.12717	1.43439e-05	0.1283	0.00207
0.13263	0.000290459	0.13468	0.00432	0.13558	1.38364e-05	0.13672	0.00226
0.14104	0.000289211	0.14309	0.00451	0.144	1.31607e-05	0.14513	0.00246
0.14946	0.000286865	0.15151	0.00469	0.15242	1.22045e-05	0.15355	0.00264
0.15788	0.000283773	0.15993	0.00486	0.16084	1.09672e-05	0.16197	0.00278
0.16629	0.000280358	0.16834	0.005	0.16925	9.58823e-06	0.17039	0.00289
0.17471	0.000277008	0.17676	0.0051	0.17767	8.23852e-06	0.1788	0.00296
0.18313	0.000273962	0.18518	0.00517	0.18609	6.9729e-06	0.18722	0.003
0.19155	0.000271274	0.1936	0.0052	0.19451	5.68106e-06	0.19564	0.00301
0.19996	0.000268878	0.20201	0.00521	0.20292	4.17265e-06	0.20406	0.003
0.20838	0.000266677	0.21043	0.0052	0.21134	2.32019e-06	0.21247	0.00298
0.2168	0.000264593	0.21885	0.00517	0.21976	1.50283e-07	0.22089	0.00295
0.22522	0.000262563	0.22727	0.00514	0.22817	-2.17712e-06	0.22931	0.00291
0.23363	0.000260523	0.23568	0.00509	0.23659	-4.47572e-06	0.23772	0.00287
0.24205	0.000258389	0.2441	0.00505	0.24501	-6.63705e-06	0.24614	0.00283
0.25047	0.00025606	0.25252	0.005	0.25343	-8.66145e-06	0.25456	0.00278
0.25889	0.00025343	0.26094	0.00495	0.26184	-1.0609e-05	0.26298	0.00273
0.2673	0.000250417	0.26935	0.0049	0.27026	-1.25047e-05	0.27139	0.00269
0.27572	0.000247008	0.27777	0.00485	0.27868	-1.42649e-05	0.27981	0.00264
0.28414	0.000243287	0.28619	0.0048	0.2871	-1.57294e-05	0.28823	0.00259
0.29255	0.000239399	0.2946	0.00475	0.29551	-1.67974e-05	0.29665	0.00254
0.30097	0.000235481	0.30302	0.0047	0.30393	-1.75378e-05	0.30506	0.0025
0.30939	0.000231608	0.31144	0.00466	0.31235	-1.81547e-05	0.31348	0.00246
0.31781	0.000227787	0.31986	0.00461	0.32076	-1.88474e-05	0.3219	0.00242
0.32622	0.000223982	0.32827	0.00457	0.32918	-1.96874e-05	0.33031	0.00238
0.33464	0.000220159	0.33669	0.00452	0.3376	-2.05944e-05	0.33873	0.00234
0.34306	0.000216307	0.34511	0.00448	0.34602	-2.14176e-05	0.34715	0.00231
0.35148	0.000212444	0.35353	0.00445	0.35443	-2.20581e-05	0.35557	0.00227
0.35989	0.000208622	0.36194	0.00441	0.36285	-2.25392e-05	0.36398	0.00224
0.36831	0.000204953	0.37036	0.00438	0.37127	-2.29881e-05	0.3724	0.00221
0.37673	0.000201605	0.37878	0.00434	0.37969	-2.35629e-05	0.38082	0.00218
0.38514	0.000198738	0.38719	0.00431	0.3881	-2.43755e-05	0.38924	0.00215
0.39356	0.000196423	0.39561	0.00428	0.39652	-2.54471e-05	0.39765	0.00212
0.40198	0.000194589	0.40403	0.00425	0.40494	-2.67081e-05	0.40607	0.00209
0.4104	0.000193037	0.41245	0.00423	0.41335	-2.80301e-05	0.41449	0.00207
0.41881	0.000191562	0.42086	0.0042	0.42177	-2.93057e-05	0.42291	0.00205
0.42723	0.000190008	0.42928	0.00417	0.43019	-3.04925e-05	0.43132	0.00202
0.43565	0.000188338	0.4377	0.00415	0.43861	-3.16621e-05	0.43974	0.002
0.44407	0.000186666	0.44612	0.00413	0.44702	-3.2951e-05	0.44816	0.00198
0.45248	0.000185204	0.45453	0.0041	0.45544	-3.44665e-05	0.45657	0.00197
0.4609	0.000184127	0.46295	0.00408	0.46386	-3.623e-05	0.46499	0.00195
0.46932	0.000183439	0.47137	0.00405	0.47228	-3.81473e-05	0.47341	0.00193
0.47773	0.000182976	0.47978	0.00403	0.48069	-4.00447e-05	0.48183	0.00191
0.48615	0.000182522	0.4882	0.00401	0.48911	-4.17623e-05	0.49024	0.00189
0.49457	0.000181924	0.49662	0.00399	0.49753	-4.32576e-05	0.49866	0.00187
0.50299	0.000181098	0.50504	0.00397	0.50594	-4.46409e-05	0.50708	0.00186
0.5114	0.000180001	0.51345	0.00395	0.51436	-4.61123e-05	0.5155	0.00184
0.51982	0.000178618	0.52187	0.00393	0.52278	-4.78659e-05	0.52391	0.00182
0.52824	0.000177005	0.53029	0.00391	0.5312	-4.99893e-05	0.53233	0.00181
0.53666	0.000175303	0.53871	0.0039	0.53961	-5.24225e-05	0.54075	0.00179
0.54507	0.00017366	0.54712	0.00388	0.54803	-5.49867e-05	0.54916	0.00178
0.55349	0.000172133	0.55554	0.00386	0.55645	-5.74473e-05	0.55758	0.00177
0.56191	0.000170665	0.56396	0.00384	0.56487	-5.95866e-05	0.566	0.00175
0.57032	0.000169139	0.57237	0.00383	0.57328	-6.12667e-05	0.57442	0.00174
0.57874	0.000167425	0.58079	0.00381	0.5817	-6.24715e-05	0.58283	0.00173
0.58716	0.000165411	0.58921	0.00379	0.59012	-6.32858e-05	0.59125	0.00172
0.59558	0.000163041	0.59763	0.00378	0.59853	-6.38329e-05	0.59967	0.0017
0.60399	0.000160358	0.60604	0.00376	0.60695	-6.42019e-05	0.60809	0.00169
0.61241	0.000157516	0.61446	0.00375	0.61537	-6.44075e-05	0.6165	0.00168
0.62083	0.000154708	0.62288	0.00373	0.62379	-6.44116e-05	0.62492	0.00167
0.62925	0.000152054	0.6313	0.00372	0.6322	-6.42119e-05	0.63334	0.00166
0.63766	0.000149538	0.63971	0.00371	0.64062	-6.39085e-05	0.64175	0.00165
0.64608	0.00014704	0.64813	0.00369	0.64904	-6.36804e-05	0.65017	0.00164
0.6545	0.00014441	0.65655	0.00368	0.65746	-6.36818e-05	0.65859	0.00163
0.66291	0.00014154	0.66496	0.00366	0.66587	-6.39476e-05	0.66701	0.00163
0.67133	0.000138386	0.67338	0.00365	0.67429	-6.43848e-05	0.67542	0.00162
0.67975	0.000134949	0.6818	0.00364	0.68271	-6.48629e-05	0.68384	0.00161
0.68817	0.000131275	0.69022	0.00362	0.69112	-6.53164e-05	0.69226	0.0016
0.69658	0.00012751	0.69863	0.00361	0.69954	-6.57593e-05	0.70068	0.0016
0.705	0.000123945	0.70705	0.0036	0.70796	-6.62244e-05	0.70909	0.00159
0.71342	0.000120905	0.71547	0.00358	0.71638	-6.67161e-05	0.71751	0.00158
0.72184	0.000118557	0.72389	0.00357	0.72479	-6.72161e-05	0.72593	0.00157
0.73025	0.000116818	0.7323	0.00356	0.73321	-6.77271e-05	0.73434	0.00156
0.73867	0.000115449	0.74072	0.00354	0.74163	-6.82952e-05	0.74276	0.00155
0.74709	0.000114226	0.74914	0.00353	0.75005	-6.89967e-05	0.75118	0.00154
0.7555	0.000113025	0.75755	0.00352	0.75846	-6.9869e-05	0.7596	0.00153
0.76392	0.00011181	0.76597	0.00351	0.76688	-7.08662e-05	0.76801	0.00152
0.77234	0.000110589	0.77439	0.0035	0.7753	-7.18956e-05	0.77643	0.00151
0.78076	0.000109373	0.78281	0.00349	0.78371	-7.29086e-05	0.78485	0.0015
0.78917	0.000108168	0.79122	0.00347	0.79213	-7.39291e-05	0.79327	0.00149
0.79759	0.000106961	0.79964	0.00346	0.80055	-7.4992e-05	0.80168	0.00149
0.80601	0.000105708	0.80806	0.00345	0.80897	-7.60608e-05	0.8101	0.00148
0.81443	0.000104336	0.81648	0.00344	0.81738	-7.70252e-05	0.81852	0.00147
0.82284	0.000102778	0.82489	0.00343	0.8258	-7.77916e-05	0.82693	0.00146
0.83126	0.000101003	0.83331	0.00342	0.83422	-7.83715e-05	0.83535	0.00145
0.83968	9.90331e-05	0.84173	0.00341	0.84264	-7.88751e-05	0.84377	0.00144
0.84809	9.69256e-05	0.85014	0.0034	0.85105	-7.94158e-05	0.85219	0.00144
0.85651	9.47501e-05	0.85856	0.00338	0.85947	-8.00364e-05	0.8606	0.00143
0.86493	9.25778e-05	0.86698	0.00337	0.86789	-8.07307e-05	0.86902	0.00142
0.87335	9.04764e-05	0.8754	0.00336	0.8763	-8.15283e-05	0.87744	0.00142
0.88176	8.84868e-05	0.88381	0.00334	0.88472	-8.25324e-05	0.88586	0.00141
0.89018	8.65968e-05	0.89223	0.00333	0.89314	-8.38356e-05	0.89427	0.0014
0.8986	8.47472e-05	0.90065	0.00332	0.90156	-8.53852e-05	0.90269	0.00139
0.90702	8.28891e-05	0.90907	0.0033	0.90997	-8.6916e-05	0.91111	0.00139
0.91543	8.1034e-05	0.91748	0.00329	0.91839	-8.80135e-05	0.91952	0.00138
0.92385	7.92592e-05	0.9259	0.00328	0.92681	-8.82963e-05	0.92794	0.00137
0.93227	7.76476e-05	0.93432	0.00327	0.93523	-8.76157e-05	0.93636	0.00136
0.94068	7.62214e-05	0.94273	0.00326	0.94364	-8.61399e-05	0.94478	0.00135
0.9491	7.49289e-05	0.95115	0.00325	0.95206	-8.42449e-05	0.95319	0.00135
0.95752	7.3686e-05	0.95957	0.00324	0.96048	-8.23307e-05	0.96161	0.00134
0.96594	7.24258e-05	0.96799	0.00323	0.96889	-8.07052e-05	0.97003	0.00133
0.97435	7.11328e-05	0.9764	0.00321	0.97731	-7.9565e-05	0.97845	0.00133
0.98277	6.98412e-05	0.98482	0.0032	0.98573	-7.89995e-05	0.98686	0.00132
0.99119	6.85965e-05	0.99324	0.00319	0.99415	-7.89738e-05	0.99528	0.00131
0.99961	6.73942e-05	1.00166	0.00318	1.00256	-7.93078e-05	1.0037	0.00131
1.00802	6.61582e-05	1.01007	0.00317	1.01098	-7.97165e-05	1.01211	0.0013
1.01644	6.47836e-05	1.01849	0.00316	1.0194	-7.99231e-05	1.02053	0.0013
1.02486	6.32227e-05	1.02691	0.00315	1.02782	-7.97892e-05	1.02895	0.00129
1.03327	6.15534e-05	1.03532	0.00314	1.03623	-7.93571e-05	1.03737	0.00129
1.04169	5.99607e-05	1.04374	0.00313	1.04465	-7.87899e-05	1.04578	0.00129
1.05011	5.86175e-05	1.05216	0.00312	1.05307	-7.82581e-05	1.0542	0.00128
1.05853	5.75591e-05	1.06058	0.00311	1.06148	-7.78414e-05	1.06262	0.00128
1.06694	5.66528e-05	1.06899	0.0031	1.0699	-7.75071e-05	1.07104	0.00127
1.07536	5.56699e-05	1.07741	0.00309	1.07832	-7.71683e-05	1.07945	0.00127
1.08378	5.43883e-05	1.08583	0.00308	1.08674	-7.67632e-05	1.08787	0.00126
1.0922	5.26502e-05	1.09425	0.00307	1.09515	-7.62892e-05	1.09629	0.00126
1.10061	5.03473e-05	1.10266	0.00306	1.10357	-7.5801e-05	1.1047	0.00125
1.10903	4.73951e-05	1.11108	0.00305	1.11199	-7.54013e-05	1.11312	0.00125
1.11745	4.37728e-05	1.1195	0.00304	1.12041	-7.52245e-05	1.12154	0.00124
1.12586	3.96096e-05	1.12791	0.00303	1.12882	-7.53985e-05	1.12996	0.00124
1.13428	3.51943e-05	1.13633	0.00303	1.13724	-7.59993e-05	1.13837	0.00123
1.1427	3.08714e-05	1.14475	0.00302	1.14566	-7.70085e-05	1.14679	0.00123
1.15112	2.69054e-05	1.15317	0.00301	1.15407	-7.83058e-05	1.15521	0.00122
1.15953	2.34155e-05	1.16158	0.003	1.16249	-7.97075e-05	1.16363	0.00122
1.16795	2.03727e-05	1.17	0.00299	1.17091	-8.1027e-05	1.17204	0.00121
1.17637	1.76502e-05	1.17842	0.00297	1.17933	-8.2116e-05	1.18046	0.00121
1.18479	1.50871e-05	1.18684	0.00296	1.18774	-8.28704e-05	1.18888	0.0012
1.1932	1.25497e-05	1.19525	0.00295	1.19616	-8.32179e-05	1.19729	0.0012
1.20162	9.97606e-06	1.20367	0.00294	1.20458	-8.31132e-05	1.20571	0.00119
1.21004	7.39061e-06	1.21209	0.00293	1.213	-8.25698e-05	1.21413	0.00119
1.21845	4.87526e-06	1.2205	0.00291	1.22141	-8.16929e-05	1.22255	0.00118
1.22687	2.5185e-06	1.22892	0.0029	1.22983	-8.06734e-05	1.23096	0.00118
1.23529	3.75755e-07	1.23734	0.00289	1.23825	-7.97363e-05	1.23938	0.00117
1.24371	-1.54785e-06	1.24576	0.00287	1.24666	-7.90736e-05	1.2478	0.00117
1.25212	-3.29772e-06	1.25417	0.00286	1.25508	-7.87858e-05	1.25622	0.00116
1.26054	-4.95452e-06	1.26259	0.00285	1.2635	-7.88638e-05	1.26463	0.00116
1.26896	-6.61367e-06	1.27101	0.00284	1.27192	-7.923e-05	1.27305	0.00115
1.27738	-8.36819e-06	1.27943	0.00283	1.28033	-7.98302e-05	1.28147	0.00115
1.28579	-1.02984e-05	1.28784	0.00282	1.28875	-8.06913e-05	1.28988	0.00114
1.29421	-1.24586e-05	1.29626	0.00281	1.29717	-8.1912e-05	1.2983	0.00114
1.30263	-1.48521e-05	1.30468	0.0028	1.30559	-8.36079e-05	1.30672	0.00113
1.31104	-1.73987e-05	1.31309	0.00279	1.314	-8.58678e-05	1.31514	0.00113
1.31946	-1.99492e-05	1.32151	0.00278	1.32242	-8.87331e-05	1.32355	0.00112
1.32788	-2.2378e-05	1.32993	0.00277	1.33084	-9.21735e-05	1.33197	0.00112
1.3363	-2.46929e-05	1.33835	0.00276	1.33926	-9.60042e-05	1.34039	0.00112
1.34471	-2.70442e-05	1.34676	0.00275	1.34767	-9.98372e-05	1.34881	0.00111
1.35313	-2.96138e-05	1.35518	0.00274	1.35609	-0.00010321	1.35722	0.00111
1.36155	-3.24648e-05	1.3636	0.00273	1.36451	-0.000105863	1.36564	0.00111
1.36997	-3.54698e-05	1.37202	0.00272	1.37292	-0.000107897	1.37406	0.0011
1.37838	-3.83852e-05	1.38043	0.00271	1.38134	-0.000109647	1.38247	0.0011
1.3868	-4.10185e-05	1.38885	0.0027	1.38976	-0.000111429	1.39089	0.00109
1.39522	-4.33327e-05	1.39727	0.00269	1.39818	-0.000113354	1.39931	0.00109
1.40363	-4.54153e-05	1.40569	0.00268	1.40659	-0.000115331	1.40773	0.00108
1.41205	-4.7376e-05	1.4141	0.00267	1.41501	-0.000117207	1.41614	0.00108
1.42047	-4.92666e-05	1.42252	0.00266	1.42343	-0.000118904	1.42456	0.00107
1.42889	-5.1071e-05	1.43094	0.00265	1.43185	-0.000120468	1.43298	0.00106
1.4373	-5.27593e-05	1.43935	0.00264	1.44026	-0.000122003	1.4414	0.00106
1.44572	-5.43546e-05	1.44777	0.00263	1.44868	-0.000123569	1.44981	0.00105
1.45414	-5.59538e-05	1.45619	0.00262	1.4571	-0.000125124	1.45823	0.00105
1.46256	-5.76831e-05	1.46461	0.00261	1.46551	-0.000126567	1.46665	0.00105
1.47097	-5.96002e-05	1.47302	0.00261	1.47393	-0.000127834	1.47506	0.00104
1.47939	-6.16026e-05	1.48144	0.0026	1.48235	-0.000128949	1.48348	0.00104
1.48781	-6.34366e-05	1.48986	0.00259	1.49077	-0.000129995	1.4919	0.00103
1.49623	-6.48389e-05	1.49828	0.00258	1.49918	-0.000131036	1.50032	0.00103
1.50464	-6.5714e-05	1.50669	0.00257	1.5076	-0.000132062	1.50873	0.00102
1.51306	-6.61846e-05	1.51511	0.00256	1.51602	-0.000132984	1.51715	0.00102
1.52148	-6.64967e-05	1.52353	0.00256	1.52444	-0.000133693	1.52557	0.00101
1.52989	-6.68744e-05	1.53194	0.00255	1.53285	-0.000134132	1.53399	0.00101
1.53831	-6.743e-05	1.54036	0.00254	1.54127	-0.000134331	1.5424	0.00101
1.54673	-6.81514e-05	1.54878	0.00253	1.54969	-0.000134392	1.55082	0.001
1.55515	-6.89448e-05	1.5572	0.00252	1.5581	-0.00013445	1.55924	0.000998483
1.56356	-6.96902e-05	1.56561	0.00251	1.56652	-0.000134629	1.56765	0.000994886
1.57198	-7.02929e-05	1.57403	0.0025	1.57494	-0.000135017	1.57607	0.000991103
1.5804	-7.0712e-05	1.58245	0.00249	1.58336	-0.000135635	1.58449	0.000987064
1.58882	-7.09731e-05	1.59087	0.00248	1.59177	-0.000136424	1.59291	0.000982737
1.59723	-7.11512e-05	1.59928	0.00247	1.60019	-0.000137243	1.60132	0.000978132
1.60565	-7.1328e-05	1.6077	0.00246	1.60861	-0.000137906	1.60974	0.000973334
1.61407	-7.15473e-05	1.61612	0.00245	1.61703	-0.000138249	1.61816	0.000968491
1.62248	-7.17908e-05	1.62453	0.00244	1.62544	-0.000138218	1.62658	0.000963757
1.6309	-7.20027e-05	1.63295	0.00243	1.63386	-0.000137924	1.63499	0.000959211
1.63932	-7.21515e-05	1.64137	0.00242	1.64228	-0.000137613	1.64341	0.000954822
1.64774	-7.22727e-05	1.64979	0.00241	1.65069	-0.000137537	1.65183	0.000950479
1.65615	-7.24595e-05	1.6582	0.0024	1.65911	-0.000137793	1.66025	0.000946051
1.66457	-7.28183e-05	1.66662	0.0024	1.66753	-0.000138288	1.66866	0.000941465
1.67299	-7.34354e-05	1.67504	0.00239	1.67595	-0.000138809	1.67708	0.000936746
1.68141	-7.43598e-05	1.68346	0.00238	1.68436	-0.000139145	1.6855	0.000931988
1.68982	-7.55862e-05	1.69187	0.00236	1.69278	-0.000139138	1.69391	0.000927272
1.69824	-7.70389e-05	1.70029	0.00235	1.7012	-0.000138688	1.70233	0.000922617
1.70666	-7.8582e-05	1.70871	0.00234	1.70962	-0.000137756	1.71075	0.000917994
1.71507	-8.00772e-05	1.71712	0.00234	1.71803	-0.000136419	1.71917	0.000913369
1.72349	-8.14515e-05	1.72554	0.00233	1.72645	-0.000134878	1.72758	0.000908734
1.73191	-8.27144e-05	1.73396	0.00232	1.73487	-0.000133385	1.736	0.000904137
1.74033	-8.39213e-05	1.74238	0.00231	1.74328	-0.000132137	1.74442	0.000899666
1.74874	-8.51143e-05	1.75079	0.0023	1.7517	-0.000131237	1.75284	0.000895415
1.75716	-8.62823e-05	1.75921	0.00229	1.76012	-0.00013071	1.76125	0.000891438
1.76558	-8.73798e-05	1.76763	0.00229	1.76854	-0.000130542	1.76967	0.000887727
1.774	-8.8383e-05	1.77605	0.00228	1.77695	-0.000130702	1.77809	0.000884202
1.78241	-8.93401e-05	1.78446	0.00227	1.78537	-0.000131145	1.7865	0.000880721
1.79083	-9.03517e-05	1.79288	0.00226	1.79379	-0.000131818	1.79492	0.000877117
1.79925	-9.15154e-05	1.8013	0.00226	1.80221	-0.000132643	1.80334	0.000873255
1.80766	-9.28767e-05	1.80971	0.00225	1.81062	-0.000133531	1.81176	0.000869078
1.81608	-9.43966e-05	1.81813	0.00224	1.81904	-0.000134392	1.82017	0.000864599
1.8245	-9.59366e-05	1.82655	0.00223	1.82746	-0.000135169	1.82859	0.000859861
1.83292	-9.73064e-05	1.83497	0.00222	1.83587	-0.000135833	1.83701	0.000854913
1.84133	-9.83509e-05	1.84338	0.00221	1.84429	-0.000136365	1.84543	0.000849814
1.84975	-9.90144e-05	1.8518	0.0022	1.85271	-0.000136729	1.85384	0.000844645
1.85817	-9.93529e-05	1.86022	0.00219	1.86113	-0.000136906	1.86226	0.000839499
1.86659	-9.95003e-05	1.86864	0.00218	1.86954	-0.00013693	1.87068	0.000834465
1.875	-9.96115e-05	1.87705	0.00217	1.87796	-0.00013691	1.87909	0.000829596
1.88342	-9.9816e-05	1.88547	0.00216	1.88638	-0.000137016	1.88751	0.000824883
1.89184	-0.000100207	1.89389	0.00215	1.8948	-0.000137459	1.89593	0.000820274
1.90025	-0.000100852	1.9023	0.00214	1.90321	-0.000138441	1.90435	0.000815711
1.90867	-0.000101801	1.91072	0.00213	1.91163	-0.000140073	1.91276	0.000811148
1.91709	-0.000103084	1.91914	0.00212	1.92005	-0.000142284	1.92118	0.000806555
1.92551	-0.000104678	1.92756	0.00211	1.92846	-0.000144786	1.9296	0.000801905
1.93392	-0.000106484	1.93597	0.0021	1.93688	-0.000147161	1.93802	0.000797173
1.94234	-0.000108336	1.94439	0.00209	1.9453	-0.000149066	1.94643	0.000792354
1.95076	-0.000110065	1.95281	0.00208	1.95372	-0.00015044	1.95485	0.000787483
1.95918	-0.000111566	1.96123	0.00207	1.96213	-0.000151513	1.96327	0.000782654
1.96759	-0.000112849	1.96964	0.00206	1.97055	-0.000152598	1.97168	0.000777997
1.97601	-0.000114024	1.97806	0.00205	1.97897	-0.000153831	1.9801	0.000773631
1.98443	-0.000115236	1.98648	0.00204	1.98739	-0.000155085	1.98852	0.000769608
1.99284	-0.000116585	1.99489	0.00203	1.9958	-0.000156121	1.99694	0.000765882
2.00126	-0.0001181	2.00331	0.00202	2.00422	-0.000156816	2.00535	0.000762331
2.00968	-0.000119745	2.01173	0.002	2.01264	-0.000157246	2.01377	0.000758824
2.0181	-0.00012145	2.02015	0.00199	2.02105	-0.000157603	2.02219	0.000755259
2.02651	-0.000123155	2.02856	0.00198	2.02947	-0.000158074	2.03061	0.000751568
2.03493	-0.00012486	2.03698	0.00197	2.03789	-0.000158746	2.03902	0.000747709
2.04335	-0.000126638	2.0454	0.00197	2.04631	-0.0001596	2.04744	0.000743652
2.05177	-0.000128591	2.05382	0.00196	2.05472	-0.00016057	2.05586	0.000739392
2.06018	-0.00013075	2.06223	0.00195	2.06314	-0.000161655	2.06427	0.000734968
2.0686	-0.000133011	2.07065	0.00194	2.07156	-0.000162973	2.07269	0.00073047
2.07702	-0.000135158	2.07907	0.00192	2.07998	-0.000164718	2.08111	0.000726004
2.08543	-0.000136964	2.08748	0.00191	2.08839	-0.000167037	2.08953	0.000721641
2.09385	-0.0001383	2.0959	0.0019	2.09681	-0.000169913	2.09794	0.000717408
2.10227	-0.00013917	2.10432	0.00189	2.10523	-0.000173143	2.10636	0.000713313
2.11069	-0.000139666	2.11274	0.00188	2.11364	-0.00017644	2.11478	0.000709383
2.1191	-0.000139921	2.12115	0.00187	2.12206	-0.000179575	2.1232	0.000705667
2.12752	-0.000140071	2.12957	0.00186	2.13048	-0.000182446	2.13161	0.000702202
2.13594	-0.000140244	2.13799	0.00184	2.1389	-0.000185049	2.14003	0.000698971
2.14436	-0.000140562	2.14641	0.00183	2.14731	-0.000187424	2.14845	0.000695885
2.15277	-0.000141139	2.15482	0.00182	2.15573	-0.000189618	2.15686	0.000692791
2.16119	-0.000142073	2.16324	0.00181	2.16415	-0.000191679	2.16528	0.000689512
2.16961	-0.000143425	2.17166	0.0018	2.17257	-0.000193659	2.1737	0.000685902
2.17802	-0.0001452	2.18007	0.00179	2.18098	-0.00019561	2.18212	0.000681897
2.18644	-0.000147328	2.18849	0.00178	2.1894	-0.000197568	2.19053	0.000677565
2.19486	-0.000149686	2.19691	0.00177	2.19782	-0.000199555	2.19895	0.000673107
2.20328	-0.000152149	2.20533	0.00176	2.20623	-0.00020157	2.20737	0.000668788
2.21169	-0.000154621	2.21374	0.00175	2.21465	-0.0002036	2.21579	0.000664789
2.22011	-0.000157035	2.22216	0.00175	2.22307	-0.00020565	2.2242	0.000661076
2.22853	-0.000159321	2.23058	0.00174	2.23149	-0.000207781	2.23262	0.000657416
2.23695	-0.000161385	2.239	0.00173	2.2399	-0.000210126	2.24104	0.000653518
2.24536	-0.000163146	2.24741	0.00172	2.24832	-0.000212859	2.24945	0.000649224
2.25378	-0.000164608	2.25583	0.00171	2.25674	-0.000216144	2.25787	0.000644622
2.2622	-0.000165892	2.26425	0.00171	2.26516	-0.000220088	2.26629	0.000640003
2.27061	-0.000167175	2.27266	0.0017	2.27357	-0.000224718	2.27471	0.000635684
2.27903	-0.000168566	2.28108	0.00169	2.28199	-0.00022998	2.28312	0.000631822
2.28745	-0.000170025	2.2895	0.00168	2.29041	-0.000235712	2.29154	0.000628371
2.29587	-0.000171394	2.29792	0.00167	2.29882	-0.000241605	2.29996	0.000625174
2.30428	-0.000172541	2.30633	0.00165	2.30724	-0.000247236	2.30838	0.000622068
2.3127	-0.000173483	2.31475	0.00164	2.31566	-0.000252206	2.31679	0.00061894
2.32112	-0.000174392	2.32317	0.00163	2.32408	-0.000256298	2.32521	0.000615712
2.32954	-0.000175488	2.33159	0.00162	2.33249	-0.000259515	2.33363	0.000612321
2.33795	-0.000176907	2.34	0.00161	2.34091	-0.00026201	2.34204	0.000608727
2.34637	-0.000178627	2.34842	0.0016	2.34933	-0.000263965	2.35046	0.000604925
2.35479	-0.000180478	2.35684	0.00159	2.35775	-0.000265514	2.35888	0.000600946
2.3632	-0.000182234	2.36525	0.00158	2.36616	-0.000266746	2.3673	0.000596837
2.37162	-0.000183728	2.37367	0.00157	2.37458	-0.000267745	2.37571	0.000592653
2.38004	-0.000184919	2.38209	0.00155	2.383	-0.000268604	2.38413	0.000588461
2.38846	-0.000185888	2.39051	0.00154	2.39141	-0.000269383	2.39255	0.00058435
2.39687	-0.000186781	2.39892	0.00153	2.39983	-0.000270091	2.40097	0.000580401
2.40529	-0.000187745	2.40734	0.00152	2.40825	-0.000270708	2.40938	0.000576656
2.41371	-0.000188869	2.41576	0.00151	2.41667	-0.000271258	2.4178	0.000573106
2.42213	-0.000190172	2.42418	0.0015	2.42508	-0.000271836	2.42622	0.000569719
2.43054	-0.000191619	2.43259	0.00149	2.4335	-0.000272555	2.43463	0.000566472
2.43896	-0.000193151	2.44101	0.00148	2.44192	-0.000273465	2.44305	0.000563325
2.44738	-0.000194709	2.44943	0.00147	2.45034	-0.000274538	2.45147	0.000560189
2.45579	-0.000196251	2.45784	0.00147	2.45875	-0.000275703	2.45989	0.000556933
2.46421	-0.000197749	2.46626	0.00146	2.46717	-0.000276905	2.4683	0.000553449
2.47263	-0.000199212	2.47468	0.00145	2.47559	-0.000278126	2.47672	0.000549725
2.48105	-0.000200684	2.4831	0.00144	2.484	-0.000279375	2.48514	0.000545858
2.48946	-0.000202217	2.49151	0.00143	2.49242	-0.000280654	2.49356	0.000541971
2.49788	-0.000203838	2.49993	0.00142	2.50084	-0.000281935	2.50197	0.000538121
2.5063	-0.000205541	2.50835	0.00141	2.50926	-0.000283158	2.51039	0.00053429
2.51472	-0.000207316	2.51677	0.0014	2.51767	-0.000284266	2.51881	0.000530436
2.52313	-0.000209174	2.52518	0.00139	2.52609	-0.00028523	2.52722	0.000526557
2.53155	-0.000211137	2.5336	0.00138	2.53451	-0.00028609	2.53564	0.000522683
2.53997	-0.000213217	2.54202	0.00137	2.54293	-0.000286968	2.54406	0.000518826
2.54838	-0.000215388	2.55043	0.00136	2.55134	-0.000288024	2.55248	0.00051494
2.5568	-0.000217586	2.55885	0.00135	2.55976	-0.000289358	2.56089	0.00051096
2.56522	-0.000219721	2.56727	0.00134	2.56818	-0.000290925	2.56931	0.000506874
2.57364	-0.000221698	2.57569	0.00133	2.5766	-0.000292537	2.57773	0.000502755
2.58205	-0.00022344	2.5841	0.00132	2.58501	-0.000293973	2.58615	0.000498708
2.59047	-0.000224935	2.59252	0.00131	2.59343	-0.000295102	2.59456	0.000494801
2.59889	-0.000226258	2.60094	0.0013	2.60185	-0.000295924	2.60298	0.000491042
2.60731	-0.000227554	2.60936	0.00129	2.61026	-0.000296526	2.6114	0.000487407
2.61572	-0.000228979	2.61777	0.00128	2.61868	-0.000297033	2.61981	0.000483865
2.62414	-0.000230635	2.62619	0.00127	2.6271	-0.000297587	2.62823	0.000480385
2.63256	-0.000232566	2.63461	0.00126	2.63552	-0.000298336	2.63665	0.000476936
2.64097	-0.000234793	2.64303	0.00124	2.64393	-0.000299409	2.64507	0.000473471
2.64939	-0.00023735	2.65144	0.00123	2.65235	-0.000300847	2.65348	0.000469926
2.65781	-0.000240272	2.65986	0.00122	2.66077	-0.000302558	2.6619	0.000466209
2.66623	-0.000243546	2.66828	0.00122	2.66919	-0.000304335	2.67032	0.000462248
2.67464	-0.000247076	2.67669	0.00121	2.6776	-0.000305964	2.67874	0.000458079
2.68306	-0.000250676	2.68511	0.0012	2.68602	-0.000307322	2.68715	0.000453897
2.69148	-0.000254096	2.69353	0.00119	2.69444	-0.000308389	2.69557	0.000449996
2.6999	-0.000257082	2.70195	0.00118	2.70285	-0.000309205	2.70399	0.000446627
2.70831	-0.000259446	2.71036	0.00117	2.71127	-0.000309826	2.7124	0.000443888
2.71673	-0.000261098	2.71878	0.00116	2.71969	-0.000310324	2.72082	0.000441678
2.72515	-0.000262061	2.7272	0.00115	2.72811	-0.000310782	2.72924	0.000439719
2.73356	-0.000262451	2.73562	0.00113	2.73652	-0.000311263	2.73766	0.00043767
2.74198	-0.00026243	2.74403	0.00112	2.74494	-0.000311777	2.74607	0.000435254
2.7504	-0.000262168	2.75245	0.00111	2.75336	-0.0003123	2.75449	0.00043232
2.75882	-0.000261842	2.76087	0.00111	2.76178	-0.000312834	2.76291	0.000428843
2.76723	-0.000261649	2.76928	0.0011	2.77019	-0.000313453	2.77133	0.000424867
2.77565	-0.000261783	2.7777	0.00109	2.77861	-0.000314292	2.77974	0.000420478
2.78407	-0.000262377	2.78612	0.00108	2.78703	-0.000315497	2.78816	0.000415809
2.79249	-0.00026344	2.79454	0.00107	2.79544	-0.000317157	2.79658	0.000411049
2.8009	-0.000264843	2.80295	0.00106	2.80386	-0.000319238	2.805	0.000406413
2.80932	-0.000266393	2.81137	0.00105	2.81228	-0.000321588	2.81341	0.00040208
2.81774	-0.000267947	2.81979	0.00104	2.8207	-0.000323996	2.82183	0.000398149
2.82616	-0.000269476	2.82821	0.00103	2.82911	-0.000326263	2.83025	0.000394624
2.83457	-0.000271043	2.83662	0.00102	2.83753	-0.000328263	2.83866	0.000391427
2.84299	-0.000272728	2.84504	0.00101	2.84595	-0.000329983	2.84708	0.000388417
2.85141	-0.000274557	2.85346	0.001	2.85437	-0.000331535	2.8555	0.000385436
2.85982	-0.00027647	2.86187	0.000992179	2.86278	-0.000333115	2.86392	0.000382347
2.86824	-0.000278358	2.87029	0.000981695	2.8712	-0.000334942	2.87233	0.000379081
2.87666	-0.000280142	2.87871	0.000971193	2.87962	-0.000337159	2.88075	0.000375643
2.88508	-0.000281813	2.88713	0.000960705	2.88803	-0.000339759	2.88917	0.00037207
2.89349	-0.000283427	2.89554	0.000950217	2.89645	-0.000342611	2.89759	0.000368357
2.90191	-0.000285072	2.90396	0.000939693	2.90487	-0.00034557	2.906	0.000364453
2.91033	-0.000286815	2.91238	0.000929096	2.91329	-0.000348578	2.91442	0.000360305
2.91875	-0.000288683	2.9208	0.000918416	2.9217	-0.000351646	2.92284	0.000355929
2.92716	-0.000290663	2.92921	0.000907693	2.93012	-0.00035476	2.93125	0.000351428
2.93558	-0.000292734	2.93763	0.000897016	2.93854	-0.000357786	2.93967	0.00034694
2.944	-0.000294882	2.94605	0.000886513	2.94696	-0.000360483	2.94809	0.000342553
2.95241	-0.000297097	2.95446	0.000876282	2.95537	-0.000362644	2.95651	0.000338275
2.96083	-0.000299354	2.96288	0.000866344	2.96379	-0.000364247	2.96492	0.000334053
2.96925	-0.000301607	2.9713	0.000856636	2.97221	-0.000365486	2.97334	0.000329814
2.97767	-0.000303808	2.97972	0.000847037	2.98062	-0.00036666	2.98176	0.000325496
2.98608	-0.000305934	2.98813	0.000837423	2.98904	-0.00036802	2.99018	0.000321056
2.9945	-0.000307992	2.99655	0.000827689	2.99746	-0.000369666	2.99859	0.000316447
3.00292	-0.000310009	3.00497	0.000817777	3.00588	-0.000371548	3.00701	0.00031162
3.01134	-0.000312009	3.01339	0.000807676	3.01429	-0.000373509	3.01543	0.000306568
3.01975	-0.000313986	3.0218	0.000797416	3.02271	-0.000375361	3.02384	0.000301379
3.02817	-0.000315896	3.03022	0.000787039	3.03113	-0.000376941	3.03226	0.000296225
3.03659	-0.000317659	3.03864	0.000776581	3.03955	-0.000378204	3.04068	0.000291272
3.045	-0.000319176	3.04705	0.000766074	3.04796	-0.000379265	3.0491	0.000286603
3.05342	-0.000320382	3.05547	0.000755564	3.05638	-0.000380349	3.05751	0.000282212
3.06184	-0.000321283	3.06389	0.000745102	3.0648	-0.000381677	3.06593	0.000278035
3.07026	-0.000321969	3.07231	0.00073472	3.07321	-0.000383345	3.07435	0.000273978
3.07867	-0.000322566	3.08072	0.000724421	3.08163	-0.000385299	3.08277	0.000269929
3.08709	-0.000323181	3.08914	0.000714194	3.09005	-0.00038738	3.09118	0.000265765
3.09551	-0.000323891	3.09756	0.000704032	3.09847	-0.000389433	3.0996	0.000261373
3.10393	-0.00032475	3.10598	0.000693944	3.10688	-0.000391381	3.10802	0.000256686
3.11234	-0.00032579	3.11439	0.000683961	3.1153	-0.000393233	3.11643	0.000251702
3.12076	-0.000327011	3.12281	0.000674123	3.12372	-0.000395057	3.12485	0.000246492
3.12918	-0.00032837	3.13123	0.000664469	3.13214	-0.000396956	3.13327	0.000241184
3.13759	-0.000329801	3.13964	0.00065502	3.14055	-0.00039904	3.14169	0.000235942
3.14601	-0.000331253	3.14806	0.000645766	3.14897	-0.000401406	3.1501	0.000230911
3.15443	-0.000332718	3.15648	0.000636655	3.15739	-0.000404085	3.15852	0.000226178
3.16285	-0.00033423	3.1649	0.000627583	3.1658	-0.00040701	3.16694	0.000221734
3.17126	-0.000335827	3.17331	0.000618417	3.17422	-0.000410041	3.17536	0.000217494
3.17968	-0.000337523	3.18173	0.000609006	3.18264	-0.00041305	3.18377	0.00021337
3.1881	-0.000339294	3.19015	0.000599233	3.19106	-0.00041597	3.19219	0.000209333
3.19652	-0.000341088	3.19857	0.000589067	3.19947	-0.000418774	3.20061	0.00020542
3.20493	-0.000342842	3.20698	0.000578598	3.20789	-0.000421447	3.20902	0.000201684
3.21335	-0.000344514	3.2154	0.000567999	3.21631	-0.000423984	3.21744	0.000198172
3.22177	-0.000346096	3.22382	0.00055746	3.22473	-0.000426385	3.22586	0.000194914
3.23018	-0.000347626	3.23223	0.000547117	3.23314	-0.000428643	3.23428	0.000191916
3.2386	-0.000349186	3.24065	0.000537007	3.24156	-0.000430715	3.24269	0.000189143
3.24702	-0.000350897	3.24907	0.000527074	3.24998	-0.000432541	3.25111	0.000186484
3.25544	-0.000352878	3.25749	0.000517208	3.25839	-0.000434098	3.25953	0.000183756
3.26385	-0.000355198	3.2659	0.000507297	3.26681	-0.000435443	3.26795	0.000180758
3.27227	-0.000357824	3.27432	0.000497272	3.27523	-0.0004367	3.27636	0.000177326
3.28069	-0.000360597	3.28274	0.000487127	3.28365	-0.000437996	3.28478	0.000173379
3.28911	-0.000363276	3.29116	0.000476902	3.29206	-0.000439419	3.2932	0.000168946
3.29752	-0.000365626	3.29957	0.000466648	3.30048	-0.000441	3.30161	0.000164182
3.30594	-0.000367514	3.30799	0.000456407	3.3089	-0.000442727	3.31003	0.00015932
3.31436	-0.000368958	3.31641	0.000446201	3.31732	-0.000444547	3.31845	0.00015458
3.32277	-0.000370118	3.32482	0.000436037	3.32573	-0.000446369	3.32687	0.000150083
3.33119	-0.000371213	3.33324	0.000425915	3.33415	-0.000448097	3.33528	0.000145831
3.33961	-0.000372434	3.34166	0.000415841	3.34257	-0.000449681	3.3437	0.000141711
3.34803	-0.000373895	3.35008	0.000405847	3.35098	-0.00045117	3.35212	0.000137521
3.35644	-0.000375609	3.35849	0.000396019	3.3594	-0.000452671	3.36054	0.000132995
3.36486	-0.000377499	3.36691	0.000386476	3.36782	-0.000454268	3.36895	0.000127876
3.37328	-0.00037942	3.37533	0.000377303	3.37624	-0.000455996	3.37737	0.000122016
3.3817	-0.000381207	3.38375	0.000368483	3.38465	-0.000457874	3.38579	0.000115472
3.39011	-0.000382722	3.39216	0.000359911	3.39307	-0.000459946	3.3942	0.000108505
3.39853	-0.00038392	3.40058	0.00035147	3.40149	-0.00046225	3.40262	0.000101485
3.40695	-0.000384875	3.409	0.000343094	3.40991	-0.000464757	3.41104	9.47536e-05
3.41536	-0.000385759	3.41741	0.000334767	3.41832	-0.000467321	3.41946	8.85145e-05
3.42378	-0.000386772	3.42583	0.000326462	3.42674	-0.000469714	3.42787	8.27806e-05
3.4322	-0.000388068	3.43425	0.000318122	3.43516	-0.00047173	3.43629	7.74263e-05
3.44062	-0.000389691	3.44267	0.000309692	3.44357	-0.000473285	3.44471	7.22884e-05
3.44903	-0.000391574	3.45108	0.000301167	3.45199	-0.000474445	3.45313	6.72442e-05
3.45745	-0.000393588	3.4595	0.00029257	3.46041	-0.000475375	3.46154	6.22386e-05
3.46587	-0.000395642	3.46792	0.000283898	3.46883	-0.00047626	3.46996	5.72805e-05
3.47429	-0.000397742	3.47634	0.00027511	3.47724	-0.000477238	3.47838	5.24338e-05
3.4827	-0.000399975	3.48475	0.000266152	3.48566	-0.00047835	3.48679	4.77911e-05
3.49112	-0.000402446	3.49317	0.00025701	3.49408	-0.000479533	3.49521	4.34218e-05
3.49954	-0.000405203	3.50159	0.00024772	3.5025	-0.000480642	3.50363	3.93122e-05
3.50795	-0.0004082	3.51	0.000238364	3.51091	-0.000481543	3.51205	3.53458e-05
3.51637	-0.000411327	3.51842	0.000229051	3.51933	-0.000482185	3.52046	3.13537e-05
3.52479	-0.000414467	3.52684	0.000219892	3.52775	-0.000482621	3.52888	2.72189e-05
3.53321	-0.000417518	3.53526	0.000210961	3.53616	-0.000482952	3.5373	2.29877e-05
3.54162	-0.00042037	3.54367	0.000202241	3.54458	-0.000483282	3.54572	1.89118e-05
3.55004	-0.00042288	3.55209	0.000193622	3.553	-0.000483692	3.55413	1.53354e-05
3.55846	-0.000424907	3.56051	0.000184961	3.56142	-0.000484241	3.56255	1.24583e-05
3.56688	-0.000426399	3.56893	0.000176176	3.56983	-0.00048496	3.57097	1.01756e-05
3.57529	-0.000427449	3.57734	0.000167306	3.57825	-0.000485853	3.57938	8.15002e-06
3.58371	-0.000428248	3.58576	0.000158492	3.58667	-0.000486888	3.5878	6.03507e-06
3.59213	-0.000428997	3.59418	0.000149881	3.59509	-0.000488007	3.59622	3.63661e-06
3.60054	-0.000429845	3.60259	0.000141519	3.6035	-0.00048914	3.60464	9.15822e-07
3.60896	-0.000430849	3.61101	0.000133306	3.61192	-0.000490237	3.61305	-2.11172e-06
3.61738	-0.000431977	3.61943	0.000125056	3.62034	-0.000491286	3.62147	-5.46061e-06
3.6258	-0.000433147	3.62785	0.000116592	3.62875	-0.00049233	3.62989	-9.16814e-06
3.63421	-0.000434279	3.63626	0.000107813	3.63717	-0.000493441	3.63831	-1.32377e-05
3.64263	-0.000435339	3.64468	9.87066e-05	3.64559	-0.000494644	3.64672	-1.7612e-05
3.65105	-0.00043634	3.6531	8.93272e-05	3.65401	-0.000495852	3.65514	-2.21938e-05
3.65947	-0.000437325	3.66152	7.97601e-05	3.66242	-0.00049684	3.66356	-2.68753e-05
3.66788	-0.000438341	3.66993	7.00982e-05	3.67084	-0.000497326	3.67197	-3.15544e-05
3.6763	-0.000439432	3.67835	6.04284e-05	3.67926	-0.000497143	3.68039	-3.61468e-05
3.68472	-0.000440633	3.68677	5.08255e-05	3.68768	-0.000496348	3.68881	-4.05988e-05
3.69313	-0.000441966	3.69518	4.13483e-05	3.69609	-0.000495159	3.69723	-4.48971e-05
3.70155	-0.000443417	3.7036	3.20309e-05	3.70451	-0.000493817	3.70564	-4.906e-05
3.70997	-0.000444922	3.71202	2.28778e-05	3.71293	-0.000492508	3.71406	-5.31051e-05
3.71839	-0.000446365	3.72044	1.38741e-05	3.72134	-0.000491371	3.72248	-5.70301e-05
3.7268	-0.000447633	3.72885	4.99293e-06	3.72976	-0.000490501	3.7309	-6.08365e-05
3.73522	-0.000448674	3.73727	-3.81706e-06	3.73818	-0.00048991	3.73931	-6.45672e-05
3.74364	-0.000449548	3.74569	-1.26513e-05	3.7466	-0.000489485	3.74773	-6.83147e-05
3.75206	-0.000450394	3.75411	-2.16412e-05	3.75501	-0.000489018	3.75615	-7.21746e-05
3.76047	-0.00045137	3.76252	-3.09076e-05	3.76343	-0.000488313	3.76456	-7.61887e-05
3.76889	-0.000452591	3.77094	-4.04945e-05	3.77185	-0.000487296	3.77298	-8.03232e-05
3.77731	-0.000454081	3.77936	-5.03282e-05	3.78027	-0.000486048	3.7814	-8.45127e-05
3.78572	-0.000455763	3.78778	-6.02485e-05	3.78868	-0.000484759	3.78982	-8.87335e-05
3.79414	-0.000457501	3.79619	-7.01149e-05	3.7971	-0.000483644	3.79823	-9.30224e-05
3.80256	-0.000459181	3.80461	-7.9905e-05	3.80552	-0.000482851	3.80665	-9.74246e-05
3.81098	-0.000460767	3.81303	-8.97206e-05	3.81393	-0.0004824	3.81507	-0.000101919
3.81939	-0.000462294	3.82144	-9.96935e-05	3.82235	-0.000482197	3.82349	-0.000106388
3.82781	-0.000463823	3.82986	-0.000109877	3.83077	-0.000482106	3.8319	-0.000110656
3.83623	-0.000465415	3.83828	-0.000120213	3.83919	-0.000482007	3.84032	-0.000114592
3.84465	-0.000467121	3.8467	-0.000130599	3.8476	-0.000481826	3.84874	-0.000118188
3.85306	-0.000468995	3.85511	-0.000140996	3.85602	-0.000481535	3.85715	-0.000121566
3.86148	-0.000471053	3.86353	-0.000151483	3.86444	-0.000481156	3.86557	-0.000124908
3.8699	-0.000473241	3.87195	-0.00016221	3.87286	-0.000480762	3.87399	-0.000128366
3.87831	-0.000475452	3.88037	-0.000173311	3.88127	-0.000480476	3.88241	-0.000132005
3.88673	-0.000477578	3.88878	-0.000184808	3.88969	-0.000480426	3.89082	-0.000135795
3.89515	-0.000479561	3.8972	-0.000196565	3.89811	-0.000480703	3.89924	-0.000139656
3.90357	-0.000481399	3.90562	-0.000208325	3.90653	-0.000481333	3.90766	-0.000143531
3.91198	-0.000483122	3.91403	-0.000219784	3.91494	-0.000482286	3.91608	-0.00014741
3.9204	-0.000484757	3.92245	-0.000230668	3.92336	-0.000483489	3.92449	-0.000151303
3.92882	-0.000486292	3.93087	-0.000240791	3.93178	-0.000484837	3.93291	-0.000155173
3.93724	-0.000487671	3.93929	-0.000250099	3.94019	-0.000486207	3.94133	-0.000158922
3.94565	-0.000488829	3.9477	-0.00025869	3.94861	-0.000487473	3.94975	-0.000162447
3.95407	-0.000489744	3.95612	-0.0002668	3.95703	-0.000488509	3.95816	-0.000165733
3.96249	-0.000490511	3.96454	-0.000274763	3.96545	-0.00048923	3.96658	-0.000168872
3.9709	-0.00049134	3.97296	-0.00028292	3.97386	-0.000489638	3.975	-0.000171999
3.97932	-0.000492492	3.98137	-0.000291523	3.98228	-0.000489867	3.98341	-0.000175214
3.98774	-0.000494154	3.98979	-0.000300679	3.9907	-0.000490158	3.99183	-0.000178546
3.99616	-0.000496355	3.99821	-0.000310335	3.99912	-0.000490759	4.00025	-0.000181969
4.00457	-0.000498946	4.00662	-0.000320302	4.00753	-0.000491809	4.00867	-0.00018544
4.01299	-0.00050169	4.01504	-0.00033032	4.01595	-0.000493294	4.01708	-0.000188949
4.02141	-0.000504381	4.02346	-0.000340139	4.02437	-0.000495052	4.0255	-0.000192525
4.02983	-0.000506905	4.03188	-0.000349574	4.03278	-0.000496822	4.03392	-0.000196223
4.03824	-0.000509235	4.04029	-0.000358523	4.0412	-0.000498335	4.04234	-0.000200103
4.04666	-0.000511393	4.04871	-0.000366983	4.04962	-0.000499423	4.05075	-0.000204196
4.05508	-0.000513432	4.05713	-0.000375036	4.05804	-0.000500069	4.05917	-0.000208481
4.0635	-0.000515419	4.06555	-0.000382827	4.06645	-0.000500371	4.06759	-0.000212867
4.07191	-0.000517416	4.07396	-0.000390542	4.07487	-0.000500482	4.076	-0.000217223
4.08033	-0.000519454	4.08238	-0.000398387	4.08329	-0.000500567	4.08442	-0.000221424
4.08875	-0.000521513	4.0908	-0.000406566	4.09171	-0.00050079	4.09284	-0.00022539
4.09716	-0.000523527	4.09921	-0.000415236	4.10012	-0.000501296	4.10126	-0.000229113
4.10558	-0.000525418	4.10763	-0.00042445	4.10854	-0.000502196	4.10967	-0.000232647
4.114	-0.00052714	4.11605	-0.000434131	4.11696	-0.000503547	4.11809	-0.000236063
4.12242	-0.000528702	4.12447	-0.0004441	4.12537	-0.00050534	4.12651	-0.000239411
4.13083	-0.000530166	4.13288	-0.000454168	4.13379	-0.000507498	4.13493	-0.000242706
4.13925	-0.000531615	4.1413	-0.000464224	4.14221	-0.000509832	4.14334	-0.000245943
4.14767	-0.000533107	4.14972	-0.000474257	4.15063	-0.000512043	4.15176	-0.000249143
4.15609	-0.000534638	4.15814	-0.000484324	4.15904	-0.000513815	4.16018	-0.000252388
4.1645	-0.000536122	4.16655	-0.000494494	4.16746	-0.000514938	4.16859	-0.000255811
4.17292	-0.000537401	4.17497	-0.000504802	4.17588	-0.000515348	4.17701	-0.000259558
4.18134	-0.000538323	4.18339	-0.000515239	4.1843	-0.000515062	4.18543	-0.000263725
4.18975	-0.000538871	4.1918	-0.000525774	4.19271	-0.000514112	4.19385	-0.000268343
4.19817	-0.000539212	4.20022	-0.000536376	4.20113	-0.000512533	4.20226	-0.000273381
4.20659	-0.000539627	4.20864	-0.000547023	4.20955	-0.000510418	4.21068	-0.000278779
4.21501	-0.000540354	4.21706	-0.00055769	4.21796	-0.000507988	4.2191	-0.000284455
4.22342	-0.00054147	4.22547	-0.000568327	4.22638	-0.000505598	4.22752	-0.000290327
4.23184	-0.000542875	4.23389	-0.000578845	4.2348	-0.000503656	4.23593	-0.000296344
4.24026	-0.000544378	4.24231	-0.000589147	4.24322	-0.000502488	4.24435	-0.000302483
4.24868	-0.000545801	4.25073	-0.000599168	4.25163	-0.000502229	4.25277	-0.000308688
4.25709	-0.000547057	4.25914	-0.000608898	4.26005	-0.000502766	4.26118	-0.000314825
4.26551	-0.000548158	4.26756	-0.000618352	4.26847	-0.00050379	4.2696	-0.000320691
4.27393	-0.000549208	4.27598	-0.000627526	4.27689	-0.000504913	4.27802	-0.000326106
4.28234	-0.000550369	4.28439	-0.000636364	4.2853	-0.000505792	4.28644	-0.00033101
4.29076	-0.000551814	4.29281	-0.00064477	4.29372	-0.000506228	4.29485	-0.000335498
4.29918	-0.000553674	4.30123	-0.000652651	4.30214	-0.000506196	4.30327	-0.000339773
4.3076	-0.000555964	4.30965	-0.000659978	4.31055	-0.00050582	4.31169	-0.00034405
4.31601	-0.000558568	4.31806	-0.000666835	4.31897	-0.000505302	4.32011	-0.000348489
4.32443	-0.000561291	4.32648	-0.00067343	4.32739	-0.00050482	4.32852	-0.000353157
4.33285	-0.000563959	4.3349	-0.000680057	4.33581	-0.000504427	4.33694	-0.000358012
4.34127	-0.000566472	4.34332	-0.000686998	4.34422	-0.000504046	4.34536	-0.000362924
4.34968	-0.000568808	4.35173	-0.000694441	4.35264	-0.000503594	4.35377	-0.000367732
4.3581	-0.000570987	4.36015	-0.000702435	4.36106	-0.000503114	4.36219	-0.000372324
4.36652	-0.000573043	4.36857	-0.000710899	4.36948	-0.000502773	4.37061	-0.000376675
4.37493	-0.000575006	4.37698	-0.000719656	4.37789	-0.000502749	4.37903	-0.000380855
4.38335	-0.000576892	4.3854	-0.000728485	4.38631	-0.000503115	4.38744	-0.000385008
4.39177	-0.000578701	4.39382	-0.000737163	4.39473	-0.000503807	4.39586	-0.000389315
4.40019	-0.000580428	4.40224	-0.000745524	4.40314	-0.000504678	4.40428	-0.000393943
4.4086	-0.000582084	4.41065	-0.000753539	4.41156	-0.000505586	4.4127	-0.00039895
4.41702	-0.000583701	4.41907	-0.000761338	4.41998	-0.000506435	4.42111	-0.000404225
4.42544	-0.000585319	4.42749	-0.000769147	4.4284	-0.000507162	4.42953	-0.000409535
4.43386	-0.000586954	4.43591	-0.000777189	4.43681	-0.000507737	4.43795	-0.000414641
4.44227	-0.000588587	4.44432	-0.000785619	4.44523	-0.000508165	4.44636	-0.000419393
4.45069	-0.000590174	4.45274	-0.000794506	4.45365	-0.000508485	4.45478	-0.000423731
4.45911	-0.000591685	4.46116	-0.000803825	4.46207	-0.000508753	4.4632	-0.000427667
4.46752	-0.00059313	4.46957	-0.000813474	4.47048	-0.000509021	4.47162	-0.00043129
4.47594	-0.000594576	4.47799	-0.000823312	4.4789	-0.000509328	4.48003	-0.000434776
4.48436	-0.000596114	4.48641	-0.000833218	4.48732	-0.000509687	4.48845	-0.000438346
4.49278	-0.000597797	4.49483	-0.000843148	4.49573	-0.000510077	4.49687	-0.000442169
4.50119	-0.000599579	4.50324	-0.000853168	4.50415	-0.000510423	4.50529	-0.000446283
4.50961	-0.000601319	4.51166	-0.00086342	4.51257	-0.000510588	4.5137	-0.000450586
4.51803	-0.000602868	4.52008	-0.000874041	4.52099	-0.000510424	4.52212	-0.000454904
4.52645	-0.00060417	4.5285	-0.000885069	4.5294	-0.000509843	4.53054	-0.000459056
4.53486	-0.000605297	4.53691	-0.000896415	4.53782	-0.000508869	4.53895	-0.000462913
4.54328	-0.000606367	4.54533	-0.000907909	4.54624	-0.000507628	4.54737	-0.000466436
4.5517	-0.000607448	4.55375	-0.00091938	4.55466	-0.000506294	4.55579	-0.000469679
4.56011	-0.000608492	4.56216	-0.000930701	4.56307	-0.000505013	4.56421	-0.000472752
4.56853	-0.000609358	4.57058	-0.000941785	4.57149	-0.000503853	4.57262	-0.000475787
4.57695	-0.000609921	4.579	-0.000952588	4.57991	-0.000502801	4.58104	-0.000478908
4.58537	-0.000610184	4.58742	-0.000963126	4.58832	-0.000501801	4.58946	-0.00048221
4.59378	-0.000610307	4.59583	-0.000973468	4.59674	-0.00050079	4.59788	-0.00048574
4.6022	-0.00061053	4.60425	-0.000983701	4.60516	-0.000499734	4.60629	-0.000489489
4.61062	-0.000611054	4.61267	-0.000993876	4.61358	-0.000498641	4.61471	-0.000493418
4.61904	-0.000611967	4.62109	-0.001	4.62199	-0.000497522	4.62313	-0.000497476
4.62745	-0.000613237	4.6295	-0.00101	4.63041	-0.00049632	4.63154	-0.000501585
4.63587	-0.000614746	4.63792	-0.00102	4.63883	-0.000494864	4.63996	-0.000505596
4.64429	-0.000616344	4.64634	-0.00103	4.64725	-0.000492907	4.64838	-0.000509313
4.6527	-0.000617875	4.65475	-0.00104	4.65566	-0.000490261	4.6568	-0.000512613
4.66112	-0.000619201	4.66317	-0.00105	4.66408	-0.000486938	4.66521	-0.000515566
4.66954	-0.000620211	4.67159	-0.00106	4.6725	-0.000483171	4.67363	-0.000518422
4.67796	-0.000620849	4.68001	-0.00107	4.68091	-0.0004793	4.68205	-0.000521462
4.68637	-0.000621147	4.68842	-0.00108	4.68933	-0.000475604	4.69047	-0.000524835
4.69479	-0.00062124	4.69684	-0.0011	4.69775	-0.000472208	4.69888	-0.000528496
4.70321	-0.000621325	4.70526	-0.00111	4.70617	-0.000469094	4.7073	-0.000532287
4.71163	-0.000621589	4.71368	-0.00112	4.71458	-0.000466183	4.71572	-0.000536092
4.72004	-0.00062214	4.72209	-0.00112	4.723	-0.000463408	4.72413	-0.000539922
4.72846	-0.000622966	4.73051	-0.00113	4.73142	-0.000460717	4.73255	-0.000543864
4.73688	-0.00062394	4.73893	-0.00114	4.73984	-0.000458026	4.74097	-0.000547965
4.74529	-0.000624856	4.74734	-0.00115	4.74825	-0.000455173	4.74939	-0.000552138
4.75371	-0.000625487	4.75576	-0.00115	4.75667	-0.000451935	4.7578	-0.000556179
4.76213	-0.00062564	4.76418	-0.00116	4.76509	-0.000448112	4.76622	-0.000559847
4.77055	-0.000625209	4.7726	-0.00117	4.7735	-0.000443631	4.77464	-0.000562966
4.77896	-0.000624212	4.78101	-0.00118	4.78192	-0.000438583	4.78306	-0.000565463
4.78738	-0.000622781	4.78943	-0.00119	4.79034	-0.000433176	4.79147	-0.000567368
4.7958	-0.000621117	4.79785	-0.0012	4.79876	-0.0004277	4.79989	-0.000568799
4.80422	-0.000619451	4.80627	-0.00121	4.80717	-0.000422514	4.80831	-0.000569931
4.81263	-0.000618001	4.81468	-0.00122	4.81559	-0.000417984	4.81672	-0.000570971
4.82105	-0.000616936	4.8231	-0.00122	4.82401	-0.000414355	4.82514	-0.000572133
4.82947	-0.000616326	4.83152	-0.00123	4.83243	-0.000411655	4.83356	-0.000573625
4.83788	-0.000616106	4.83993	-0.00124	4.84084	-0.00040966	4.84198	-0.000575622
4.8463	-0.000616092	4.84835	-0.00125	4.84926	-0.000407972	4.85039	-0.000578231
4.85472	-0.000616036	4.85677	-0.00126	4.85768	-0.000406188	4.85881	-0.000581416
4.86314	-0.00061572	4.86519	-0.00126	4.86609	-0.000404051	4.86723	-0.000584965
4.87155	-0.000615032	4.8736	-0.00127	4.87451	-0.00040151	4.87565	-0.000588525
4.87997	-0.000614007	4.88202	-0.00128	4.88293	-0.000398681	4.88406	-0.000591734
4.88839	-0.000612818	4.89044	-0.00128	4.89135	-0.000395738	4.89248	-0.000594362
4.89681	-0.000611712	4.89886	-0.00129	4.89976	-0.000392807	4.9009	-0.000596382
4.90522	-0.000610929	4.90727	-0.0013	4.90818	-0.000389909	4.90931	-0.00059798
4.91364	-0.000610611	4.91569	-0.00131	4.9166	-0.000386983	4.91773	-0.000599464
4.92206	-0.000610747	4.92411	-0.00131	4.92502	-0.000383941	4.92615	-0.00060113
4.93047	-0.000611183	4.93253	-0.00132	4.93343	-0.000380687	4.93457	-0.000603134
4.93889	-0.000611695	4.94094	-0.00133	4.94185	-0.000377131	4.94298	-0.000605431
4.94731	-0.000612084	4.94936	-0.00134	4.95027	-0.000373189	4.9514	-0.00060782
4.95573	-0.000612218	4.95778	-0.00135	4.95868	-0.000368805	4.95982	-0.000610073
4.96414	-0.000612026	4.96619	-0.00135	4.9671	-0.000363971	4.96824	-0.000612046
4.97256	-0.00061149	4.97461	-0.00136	4.97552	-0.00035871	4.97665	-0.000613694
4.98098	-0.000610636	4.98303	-0.00137	4.98394	-0.000353006	4.98507	-0.000615028
4.9894	-0.000609515	4.99145	-0.00137	4.99235	-0.000346768	4.99349	-0.000616075
4.99781	-0.000608193	4.99986	-0.00138	5.00077	-0.000339856	5.0019	-0.000616843
5.00623	-0.000606722	5.00828	-0.00138	5.00919	-0.000332128	5.01032	-0.00061728
5.01465	-0.00060512	5.0167	-0.00139	5.01761	-0.0003235	5.01874	-0.000617269
5.02306	-0.00060338	5.02512	-0.0014	5.02602	-0.000313994	5.02716	-0.000616664
5.03148	-0.000601485	5.03353	-0.0014	5.03444	-0.000303748	5.03557	-0.000615376
5.0399	-0.00059942	5.04195	-0.00141	5.04286	-0.000292954	5.04399	-0.000613451
5.04832	-0.000597166	5.05037	-0.00141	5.05127	-0.000281813	5.05241	-0.000611093
5.05673	-0.000594715	5.05878	-0.00142	5.05969	-0.000270513	5.06083	-0.000608593
5.06515	-0.000592082	5.0672	-0.00142	5.06811	-0.000259187	5.06924	-0.000606253
5.07357	-0.000589304	5.07562	-0.00142	5.07653	-0.000247841	5.07766	-0.000604325
5.08199	-0.000586434	5.08404	-0.00143	5.08494	-0.000236322	5.08608	-0.000602966
5.0904	-0.000583533	5.09245	-0.00143	5.09336	-0.000224365	5.09449	-0.000602216
5.09882	-0.000580654	5.10087	-0.00144	5.10178	-0.000211729	5.10291	-0.000601995
5.10724	-0.000577809	5.10929	-0.00144	5.1102	-0.000198328	5.11133	-0.00060214
5.11565	-0.000574963	5.11771	-0.00145	5.11861	-0.000184262	5.11975	-0.000602453
5.12407	-0.000572051	5.12612	-0.00145	5.12703	-0.000169763	5.12816	-0.000602751
5.13249	-0.000569042	5.13454	-0.00146	5.13545	-0.00015513	5.13658	-0.000602883
5.14091	-0.000566	5.14296	-0.00146	5.14387	-0.000140666	5.145	-0.000602735
5.14932	-0.000563076	5.15137	-0.00147	5.15228	-0.000126593	5.15342	-0.000602269
5.15774	-0.000560426	5.15979	-0.00147	5.1607	-0.000112994	5.16183	-0.000601579
5.16616	-0.000558114	5.16821	-0.00148	5.16912	-9.97817e-05	5.17025	-0.000600894
5.17458	-0.000556041	5.17663	-0.00148	5.17753	-8.66903e-05	5.17867	-0.000600485
5.18299	-0.000553963	5.18504	-0.00149	5.18595	-7.33092e-05	5.18709	-0.000600555
5.19141	-0.00055157	5.19346	-0.0015	5.19437	-5.91526e-05	5.1955	-0.000601191
5.19983	-0.000548569	5.20188	-0.0015	5.20279	-4.36499e-05	5.20392	-0.000602363
5.20824	-0.000544731	5.2103	-0.00151	5.2112	-2.59692e-05	5.21234	-0.000603943
5.21666	-0.000539892	5.21871	-0.00152	5.21962	-4.66456e-06	5.22075	-0.000605709
5.22508	-0.000533889	5.22713	-0.00152	5.22804	2.28108e-05	5.22917	-0.000607328
5.2335	-0.000526427	5.23555	-0.00153	5.23646	6.0624e-05	5.23759	-0.000608339
5.24191	-0.000516964	5.24396	-0.00154	5.24487	0.000114924	5.24601	-0.00060813
5.25033	-0.000504727	5.25238	-0.00154	5.25329	0.000194063	5.25442	-0.000605919
5.25875	-0.00048884	5.2608	-0.00155	5.26171	0.000308859	5.26284	-0.000600748
5.26717	-0.000468487	5.26922	-0.00156	5.27012	0.000472752	5.27126	-0.000591517
5.27558	-0.000443081	5.27763	-0.00156	5.27854	0.000701424	5.27968	-0.000577012
5.284	-0.000412411	5.28605	-0.00157	5.28696	0.00101	5.28809	-0.000555962
5.29242	-0.000376752	5.29447	-0.00157	5.29538	0.00142	5.29651	-0.000527135
5.30084	-0.000336978	5.30289	-0.00157	5.30379	0.00193	5.30493	-0.000489438
5.30925	-0.00029464	5.3113	-0.00157	5.31221	0.00256	5.31334	-0.00044201
5.31767	-0.000251798	5.31972	-0.00157	5.32063	0.0033	5.32176	-0.000384448
5.32609	-0.000210612	5.32814	-0.00156	5.32905	0.00412	5.33018	-0.000317155
5.3345	-0.000172913	5.33655	-0.00155	5.33746	0.00502	5.3386	-0.000241618
5.34292	-0.000139964	5.34497	-0.00153	5.34588	0.00595	5.34701	-0.000160449
5.35134	-0.000112441	5.35339	-0.00151	5.3543	0.00688	5.35543	-7.72083e-05
5.35976	-9.04996e-05	5.36181	-0.00148	5.36271	0.00779	5.36385	4.01368e-06
5.36817	-7.3815e-05	5.37022	-0.00145	5.37113	0.00863	5.37227	7.92078e-05
5.37659	-6.15987e-05	5.37864	-0.00142	5.37955	0.00941	5.38068	0.000145019
5.38501	-5.27183e-05	5.38706	-0.00139	5.38797	0.01009	5.3891	0.000199016
5.39343	-4.59519e-05	5.39548	-0.00135	5.39638	0.01069	5.39752	0.000239663
5.40184	-4.02147e-05	5.40389	-0.00132	5.4048	0.01122	5.40593	0.000266267
5.41026	-3.46026e-05	5.41231	-0.0013	5.41322	0.01167	5.41435	0.000279048
5.41868	-2.82846e-05	5.42073	-0.00128	5.42164	0.01208	5.42277	0.000279211
5.42709	-2.04109e-05	5.42914	-0.00126	5.43005	0.01244	5.43119	0.000268841
5.43551	-1.01425e-05	5.43756	-0.00125	5.43847	0.01278	5.4396	0.000250602
5.44393	3.2695e-06	5.44598	-0.00125	5.44689	0.01311	5.44802	0.000227359
5.45235	2.04938e-05	5.4544	-0.00125	5.4553	0.01343	5.45644	0.000201815
5.46076	4.22203e-05	5.46281	-0.00126	5.46372	0.01376	5.46486	0.000176199
5.46918	6.92019e-05	5.47123	-0.00127	5.47214	0.01409	5.47327	0.000152127
5.4776	0.00010218	5.47965	-0.00128	5.48056	0.01443	5.48169	0.000130753
5.48602	0.000141771	5.48807	-0.00129	5.48897	0.01479	5.49011	0.000113052
5.49443	0.000188357	5.49648	-0.00129	5.49739	0.01515	5.49852	9.99999e-05
5.50285	0.000242011	5.5049	-0.0013	5.50581	0.01553	5.50694	9.25604e-05
5.51127	0.00030253	5.51332	-0.0013	5.51423	0.01592	5.51536	9.15492e-05
5.51968	0.000369559	5.52173	-0.0013	5.52264	0.01632	5.52378	9.75435e-05
5.5281	0.000442694	5.53015	-0.00129	5.53106	0.01673	5.53219	0.000110958
5.53652	0.000521522	5.53857	-0.00128	5.53948	0.01716	5.54061	0.000132169
5.54494	0.000605633	5.54699	-0.00127	5.54789	0.01759	5.54903	0.000161513
5.55335	0.000694587	5.5554	-0.00125	5.55631	0.01804	5.55745	0.000199194
5.56177	0.000787819	5.56382	-0.00123	5.56473	0.0185	5.56586	0.000245246
5.57019	0.000884582	5.57224	-0.0012	5.57315	0.01897	5.57428	0.000299538
5.57861	0.000983988	5.58066	-0.00116	5.58156	0.01946	5.5827	0.000361778
5.58702	0.00109	5.58907	-0.00112	5.58998	0.01996	5.59111	0.000431526
5.59544	0.00119	5.59749	-0.00107	5.5984	0.02047	5.59953	0.000508204
5.60386	0.00129	5.60591	-0.00101	5.60682	0.02099	5.60795	0.000591069
5.61227	0.00139	5.61432	-0.000952787	5.61523	0.02152	5.61637	0.00067921
5.62069	0.0015	5.62274	-0.000885637	5.62365	0.02205	5.62478	0.000771621
5.62911	0.0016	5.63116	-0.000813081	5.63207	0.02258	5.6332	0.000867315
5.63753	0.0017	5.63958	-0.000735543	5.64048	0.0231	5.64162	0.00096542
5.64594	0.00181	5.64799	-0.000653503	5.6489	0.02362	5.65004	0.00107
5.65436	0.00192	5.65641	-0.00056756	5.65732	0.02412	5.65845	0.00117
5.66278	0.00202	5.66483	-0.000478414	5.66574	0.02461	5.66687	0.00127
5.6712	0.00214	5.67325	-0.000386762	5.67415	0.02507	5.67529	0.00137
5.67961	0.00225	5.68166	-0.000293223	5.68257	0.02551	5.6837	0.00147
5.68803	0.00238	5.69008	-0.000198381	5.69099	0.02591	5.69212	0.00157
5.69645	0.00252	5.6985	-0.000102895	5.69941	0.02629	5.70054	0.00167
5.70486	0.00267	5.70691	-7.46671e-06	5.70782	0.02663	5.70896	0.00177
5.71328	0.00283	5.71533	8.73733e-05	5.71624	0.02693	5.71737	0.00187
5.7217	0.00301	5.72375	0.000181471	5.72466	0.0272	5.72579	0.00197
5.73012	0.00322	5.73217	0.000275107	5.73307	0.02743	5.73421	0.00208
5.73853	0.00345	5.74058	0.000368975	5.74149	0.02762	5.74263	0.0022
5.74695	0.0037	5.749	0.000464154	5.74991	0.02779	5.75104	0.00233
5.75537	0.00399	5.75742	0.000562102	5.75833	0.02793	5.75946	0.00246
5.76379	0.00431	5.76584	0.000664666	5.76674	0.02804	5.76788	0.00262
5.7722	0.00466	5.77425	0.000774043	5.77516	0.02813	5.77629	0.00279
5.78062	0.00505	5.78267	0.000892693	5.78358	0.02821	5.78471	0.00299
5.78904	0.00547	5.79109	0.00102	5.792	0.02827	5.79313	0.00321
5.79745	0.00593	5.7995	0.00117	5.80041	0.02832	5.80155	0.00346
5.80587	0.00643	5.80792	0.00133	5.80883	0.02837	5.80996	0.00374
5.81429	0.00695	5.81634	0.00152	5.81725	0.02842	5.81838	0.00406
5.82271	0.00751	5.82476	0.00173	5.82566	0.02847	5.8268	0.00441
5.83112	0.0081	5.83317	0.00197	5.83408	0.02853	5.83522	0.00481
5.83954	0.00871	5.84159	0.00225	5.8425	0.02859	5.84363	0.00524
5.84796	0.00933	5.85001	0.00257	5.85092	0.02867	5.85205	0.00572
5.85638	0.00997	5.85843	0.00292	5.85933	0.02875	5.86047	0.00623
5.86479	0.01061	5.86684	0.00333	5.86775	0.02884	5.86888	0.00679
5.87321	0.01126	5.87526	0.00378	5.87617	0.02895	5.8773	0.00739
5.88163	0.0119	5.88368	0.00428	5.88459	0.02906	5.88572	0.00802
5.89004	0.01253	5.89209	0.00484	5.893	0.02917	5.89414	0.00869
5.89846	0.01314	5.90051	0.00544	5.90142	0.02929	5.90255	0.00938
5.90688	0.01373	5.90893	0.0061	5.90984	0.02941	5.91097	0.01011
5.9153	0.01429	5.91735	0.0068	5.91825	0.02952	5.91939	0.01085
5.92371	0.01481	5.92576	0.00755	5.92667	0.02964	5.92781	0.0116
5.93213	0.0153	5.93418	0.00834	5.93509	0.02974	5.93622	0.01236
5.94055	0.01574	5.9426	0.00915	5.94351	0.02983	5.94464	0.01313
5.94897	0.01614	5.95102	0.01	5.95192	0.02991	5.95306	0.01389
5.95738	0.01648	5.95943	0.01086	5.96034	0.02998	5.96147	0.01464
5.9658	0.01678	5.96785	0.01173	5.96876	0.03004	5.96989	0.01537
5.97422	0.01703	5.97627	0.0126	5.97718	0.03009	5.97831	0.01607
5.98263	0.01722	5.98468	0.01347	5.98559	0.03012	5.98673	0.01675
5.99105	0.01736	5.9931	0.01433	5.99401	0.03014	5.99514	0.01738
5.99947	0.01746	6.00152	0.01515	6.00243	0.03014	6.00356	0.01797
6.00789	0.0175	6.00994	0.01595	6.01084	0.03014	6.01198	0.01852
6.0163	0.0175	6.01835	0.01671	6.01926	0.03013	6.0204	0.01901
6.02472	0.01745	6.02677	0.01742	6.02768	0.03011	6.02881	0.01945
6.03314	0.01736	6.03519	0.01809	6.0361	0.0301	6.03723	0.01983
6.04156	0.01724	6.04361	0.01869	6.04451	0.03008	6.04565	0.02015
6.04997	0.01708	6.05202	0.01924	6.05293	0.03006	6.05406	0.02042
6.05839	0.0169	6.06044	0.01973	6.06135	0.03005	6.06248	0.02062
6.06681	0.01668	6.06886	0.02015	6.06977	0.03005	6.0709	0.02077
6.07522	0.01644	6.07727	0.02051	6.07818	0.03006	6.07932	0.02087
6.08364	0.01619	6.08569	0.0208	6.0866	0.03009	6.08773	0.0209
6.09206	0.01591	6.09411	0.02104	6.09502	0.03012	6.09615	0.02089
6.10048	0.01563	6.10253	0.02121	6.10343	0.03018	6.10457	0.02082
6.10889	0.01534	6.11094	0.02132	6.11185	0.03026	6.11299	0.0207
6.11731	0.01504	6.11936	0.02138	6.12027	0.03035	6.1214	0.02054
6.12573	0.01474	6.12778	0.02138	6.12869	0.03048	6.12982	0.02034
6.13415	0.01445	6.1362	0.02134	6.1371	0.03062	6.13824	0.0201
6.14256	0.01416	6.14461	0.02124	6.14552	0.0308	6.14665	0.01983
6.15098	0.01388	6.15303	0.0211	6.15394	0.031	6.15507	0.01953
6.1594	0.0136	6.16145	0.02092	6.16236	0.03123	6.16349	0.01921
6.16781	0.01335	6.16987	0.02071	6.17077	0.03149	6.17191	0.01887
6.17623	0.0131	6.17828	0.02046	6.17919	0.03179	6.18032	0.01851
6.18465	0.01288	6.1867	0.02018	6.18761	0.03212	6.18874	0.01815
6.19307	0.01268	6.19512	0.01989	6.19602	0.03248	6.19716	0.01777
6.20148	0.0125	6.20353	0.01957	6.20444	0.03287	6.20558	0.01739
6.2099	0.01235	6.21195	0.01923	6.21286	0.0333	6.21399	0.01701
6.21832	0.01222	6.22037	0.01888	6.22128	0.03376	6.22241	0.01663
6.22674	0.01212	6.22879	0.01853	6.22969	0.03425	6.23083	0.01626
6.23515	0.01206	6.2372	0.01816	6.23811	0.03478	6.23924	0.01589
6.24357	0.01202	6.24562	0.0178	6.24653	0.03535	6.24766	0.01554
6.25199	0.01202	6.25404	0.01743	6.25495	0.03594	6.25608	0.01519
6.2604	0.01205	6.26246	0.01707	6.26336	0.03657	6.2645	0.01487
6.26882	0.01211	6.27087	0.01672	6.27178	0.03723	6.27291	0.01457
6.27724	0.01222	6.27929	0.01638	6.2802	0.03793	6.28133	0.01429
6.28566	0.01237	6.28771	0.01605	6.28861	0.03865	6.28975	0.01403
6.29407	0.01256	6.29612	0.01573	6.29703	0.03941	6.29817	0.0138
6.30249	0.01281	6.30454	0.01544	6.30545	0.04019	6.30658	0.0136
6.31091	0.01312	6.31296	0.01517	6.31387	0.04101	6.315	0.01343
6.31933	0.01349	6.32138	0.01492	6.32228	0.04186	6.32342	0.01331
6.32774	0.01393	6.32979	0.01469	6.3307	0.04274	6.33184	0.01322
6.33616	0.01446	6.33821	0.0145	6.33912	0.04365	6.34025	0.01319
6.34458	0.0151	6.34663	0.01433	6.34754	0.0446	6.34867	0.0132
6.35299	0.01585	6.35505	0.0142	6.35595	0.04558	6.35709	0.01328
6.36141	0.01674	6.36346	0.01411	6.36437	0.04661	6.3655	0.01343
6.36983	0.0178	6.37188	0.01407	6.37279	0.04767	6.37392	0.01366
6.37825	0.01905	6.3803	0.01407	6.38121	0.04879	6.38234	0.01399
6.38666	0.02054	6.38871	0.01412	6.38962	0.04997	6.39076	0.01443
6.39508	0.02231	6.39713	0.01423	6.39804	0.05121	6.39917	0.01499
6.4035	0.02441	6.40555	0.01441	6.40646	0.05253	6.40759	0.01571
6.41192	0.0269	6.41397	0.01466	6.41487	0.05395	6.41601	0.01661
6.42033	0.02988	6.42238	0.01501	6.42329	0.0555	6.42443	0.01773
6.42875	0.03342	6.4308	0.01546	6.43171	0.0572	6.43284	0.01909
6.43717	0.03766	6.43922	0.01603	6.44013	0.05909	6.44126	0.02075
6.44558	0.04273	6.44764	0.01674	6.44854	0.06121	6.44968	0.02275
6.454	0.0488	6.45605	0.01763	6.45696	0.06365	6.45809	0.02516
6.46242	0.05607	6.46447	0.01871	6.46538	0.06646	6.46651	0.02806
6.47084	0.06477	6.47289	0.02002	6.4738	0.06974	6.47493	0.03152
6.47925	0.07515	6.4813	0.0216	6.48221	0.07361	6.48335	0.03567
6.48767	0.0875	6.48972	0.02349	6.49063	0.07819	6.49176	0.04063
6.49609	0.10212	6.49814	0.02574	6.49905	0.08365	6.50018	0.04654
6.50451	0.11933	6.50656	0.02842	6.50746	0.09015	6.5086	0.05359
6.51292	0.13945	6.51497	0.03159	6.51588	0.09788	6.51702	0.06197
6.52134	0.16277	6.52339	0.03533	6.5243	0.10705	6.52543	0.07192
6.52976	0.18953	6.53181	0.03975	6.53272	0.11787	6.53385	0.0837
6.53817	0.21995	6.54023	0.04495	6.54113	0.13054	6.54227	0.09758
6.54659	0.25412	6.54864	0.05108	6.54955	0.14528	6.55068	0.11386
6.55501	0.29205	6.55706	0.05829	6.55797	0.16225	6.5591	0.13283
6.56343	0.33363	6.56548	0.06678	6.56639	0.18161	6.56752	0.15478
6.57184	0.37861	6.57389	0.07676	6.5748	0.20346	6.57594	0.17995
6.58026	0.42659	6.58231	0.08848	6.58322	0.22785	6.58435	0.20856
6.58868	0.47703	6.59073	0.10221	6.59164	0.25476	6.59277	0.24074
6.5971	0.52928	6.59915	0.11825	6.60005	0.28413	6.60119	0.27654
6.60551	0.58256	6.60756	0.1369	6.60847	0.31581	6.60961	0.31591
6.61393	0.636	6.61598	0.15846	6.61689	0.34958	6.61802	0.35867
6.62235	0.68867	6.6244	0.18323	6.62531	0.38516	6.62644	0.4045
6.63077	0.73962	6.63282	0.21144	6.63372	0.42223	6.63486	0.45297
6.63918	0.78788	6.64123	0.24328	6.64214	0.46044	6.64327	0.5035
6.6476	0.83255	6.64965	0.27885	6.65056	0.49938	6.65169	0.55542
6.65602	0.87285	6.65807	0.31814	6.65898	0.53865	6.66011	0.60794
6.66443	0.90819	6.66648	0.36103	6.66739	0.57788	6.66853	0.66022
6.67285	0.93813	6.6749	0.40723	6.67581	0.61667	6.67694	0.71134
6.68127	0.9624	6.68332	0.45633	6.68423	0.65468	6.68536	0.76038
6.68969	0.98075	6.69174	0.50774	6.69264	0.69161	6.69378	0.80644
6.6981	0.99309	6.70015	0.56078	6.70106	0.72718	6.7022	0.84868
6.70652	0.99945	6.70857	0.6146	6.70948	0.76115	6.71061	0.88645
6.71494	1	6.71699	0.66827	6.7179	0.79334	6.71903	0.91926
6.72336	0.99506	6.72541	0.72079	6.72631	0.82359	6.72745	0.94679
6.73177	0.98505	6.73382	0.77113	6.73473	0.85176	6.73586	0.96878
6.74019	0.97043	6.74224	0.81824	6.74315	0.87772	6.74428	0.98503
6.74861	0.95174	6.75066	0.8612	6.75157	0.90137	6.7527	0.99542
6.75702	0.92953	6.75907	0.89925	6.75998	0.92261	6.76112	1
6.76544	0.90433	6.76749	0.93182	6.7684	0.94137	6.76953	0.99894
6.77386	0.8767	6.77591	0.95847	6.77682	0.95762	6.77795	0.99255
6.78228	0.84713	6.78433	0.9788	6.78523	0.97133	6.78637	0.98123
6.79069	0.81612	6.79274	0.99254	6.79365	0.98246	6.79479	0.96543
6.79911	0.78409	6.80116	0.99958	6.80207	0.99094	6.8032	0.94567
6.80753	0.75145	6.80958	1	6.81049	0.99672	6.81162	0.92247
6.81595	0.71854	6.818	0.99407	6.8189	0.99975	6.82004	0.89635
6.82436	0.68566	6.82641	0.9822	6.82732	1	6.82845	0.86785
6.83278	0.65308	6.83483	0.96489	6.83574	0.9975	6.83687	0.83745
6.8412	0.62102	6.84325	0.94274	6.84416	0.9923	6.84529	0.80563
6.84961	0.58965	6.85166	0.91641	6.85257	0.98447	6.85371	0.77282
6.85803	0.55912	6.86008	0.88655	6.86099	0.97412	6.86212	0.73943
6.86645	0.52954	6.8685	0.85385	6.86941	0.96137	6.87054	0.70579
6.87487	0.50101	6.87692	0.81898	6.87782	0.94638	6.87896	0.67222
6.88328	0.47358	6.88533	0.78255	6.88624	0.92932	6.88738	0.63899
6.8917	0.4473	6.89375	0.74516	6.89466	0.91037	6.89579	0.60632
6.90012	0.42219	6.90217	0.70732	6.90308	0.88974	6.90421	0.57439
6.90854	0.39826	6.91059	0.66952	6.91149	0.86764	6.91263	0.54336
6.91695	0.3755	6.919	0.63213	6.91991	0.84428	6.92104	0.51335
6.92537	0.3539	6.92742	0.59552	6.92833	0.81987	6.92946	0.48445
6.93379	0.33345	6.93584	0.55994	6.93675	0.79463	6.93788	0.45673
6.9422	0.31411	6.94425	0.52563	6.94516	0.76876	6.9463	0.43022
6.95062	0.29585	6.95267	0.49274	6.95358	0.74247	6.95471	0.40497
6.95904	0.27864	6.96109	0.46139	6.962	0.71594	6.96313	0.38096
6.96746	0.26245	6.96951	0.43165	6.97041	0.68935	6.97155	0.35821
6.97587	0.24723	6.97792	0.40356	6.97883	0.66286	6.97997	0.33669
6.98429	0.23294	6.98634	0.37712	6.98725	0.63661	6.98838	0.31637
6.99271	0.21954	6.99476	0.35231	6.99567	0.61075	6.9968	0.29723
7.00113	0.20699	7.00318	0.3291	7.00408	0.58539	7.00522	0.27923
7.00954	0.19526	7.01159	0.30742	7.0125	0.56063	7.01363	0.26232
7.01796	0.18429	7.02001	0.28721	7.02092	0.53655	7.02205	0.24646
7.02638	0.17407	7.02843	0.2684	7.02934	0.51323	7.03047	0.23161
7.03479	0.16453	7.03684	0.2509	7.03775	0.49072	7.03889	0.21772
7.04321	0.15566	7.04526	0.23463	7.04617	0.46907	7.0473	0.20473
7.05163	0.14741	7.05368	0.21952	7.05459	0.4483	7.05572	0.1926
7.06005	0.13975	7.0621	0.20548	7.063	0.42844	7.06414	0.1813
7.06846	0.13264	7.07051	0.19243	7.07142	0.40949	7.07256	0.17076
7.07688	0.12604	7.07893	0.18031	7.07984	0.39146	7.08097	0.16094
7.0853	0.11993	7.08735	0.16904	7.08826	0.37432	7.08939	0.15181
7.09372	0.11428	7.09577	0.15855	7.09667	0.35806	7.09781	0.14331
7.10213	0.10904	7.10418	0.1488	7.10509	0.34266	7.10622	0.13542
7.11055	0.10418	7.1126	0.13972	7.11351	0.32809	7.11464	0.12808
7.11897	0.09968	7.12102	0.13127	7.12193	0.31431	7.12306	0.12126
7.12738	0.09549	7.12943	0.12339	7.13034	0.30128	7.13148	0.11493
7.1358	0.0916	7.13785	0.11605	7.13876	0.28896	7.13989	0.10904
7.14422	0.08797	7.14627	0.10921	7.14718	0.27731	7.14831	0.10356
7.15264	0.08457	7.15469	0.10283	7.15559	0.26629	7.15673	0.09847
7.16105	0.08138	7.1631	0.09687	7.16401	0.25586	7.16515	0.09373
7.16947	0.07838	7.17152	0.09132	7.17243	0.24597	7.17356	0.08931
7.17789	0.07554	7.17994	0.08614	7.18085	0.23658	7.18198	0.08518
7.18631	0.07284	7.18836	0.0813	7.18926	0.22767	7.1904	0.08132
7.19472	0.07026	7.19677	0.07679	7.19768	0.21918	7.19881	0.0777
7.20314	0.0678	7.20519	0.07259	7.2061	0.2111	7.20723	0.07431
7.21156	0.06543	7.21361	0.06867	7.21452	0.20339	7.21565	0.07113
7.21997	0.06314	7.22202	0.06501	7.22293	0.19603	7.22407	0.06812
7.22839	0.06093	7.23044	0.06161	7.23135	0.18898	7.23248	0.06529
7.23681	0.05878	7.23886	0.05844	7.23977	0.18224	7.2409	0.06261
7.24523	0.0567	7.24728	0.05549	7.24818	0.17578	7.24932	0.06007
7.25364	0.05468	7.25569	0.05275	7.2566	0.16958	7.25774	0.05766
7.26206	0.0527	7.26411	0.0502	7.26502	0.16363	7.26615	0.05537
7.27048	0.05078	7.27253	0.04783	7.27344	0.15792	7.27457	0.05318
7.2789	0.04892	7.28095	0.04562	7.28185	0.15244	7.28299	0.0511
7.28731	0.0471	7.28936	0.04357	7.29027	0.14718	7.2914	0.0491
7.29573	0.04534	7.29778	0.04166	7.29869	0.14212	7.29982	0.0472
7.30415	0.04362	7.3062	0.03988	7.30711	0.13726	7.30824	0.04537
7.31256	0.04196	7.31462	0.03822	7.31552	0.1326	7.31666	0.04361
7.32098	0.04036	7.32303	0.03666	7.32394	0.12813	7.32507	0.04192
7.3294	0.0388	7.33145	0.03518	7.33236	0.12383	7.33349	0.04029
7.33782	0.0373	7.33987	0.03379	7.34077	0.11972	7.34191	0.03873
7.34623	0.03586	7.34828	0.03247	7.34919	0.11577	7.35033	0.03722
7.35465	0.03447	7.3567	0.0312	7.35761	0.11198	7.35874	0.03577
7.36307	0.03314	7.36512	0.02998	7.36603	0.10834	7.36716	0.03437
7.37149	0.03186	7.37354	0.02881	7.37444	0.10486	7.37558	0.03303
7.3799	0.03063	7.38195	0.02766	7.38286	0.10152	7.38399	0.03173
7.38832	0.02946	7.39037	0.02655	7.39128	0.09832	7.39241	0.03048
7.39674	0.02834	7.39879	0.02546	7.3997	0.09526	7.40083	0.02928
7.40515	0.02728	7.40721	0.02439	7.40811	0.09232	7.40925	0.02812
7.41357	0.02627	7.41562	0.02333	7.41653	0.0895	7.41766	0.02701
7.42199	0.02531	7.42404	0.0223	7.42495	0.0868	7.42608	0.02595
7.43041	0.0244	7.43246	0.02128	7.43336	0.08421	7.4345	0.02494
7.43882	0.02354	7.44087	0.02028	7.44178	0.08173	7.44292	0.02396
7.44724	0.02273	7.44929	0.01929	7.4502	0.07934	7.45133	0.02304
7.45566	0.02196	7.45771	0.01833	7.45862	0.07705	7.45975	0.02216
7.46408	0.02125	7.46613	0.01739	7.46703	0.07485	7.46817	0.02132
7.47249	0.02058	7.47454	0.01647	7.47545	0.07274	7.47659	0.02052
7.48091	0.01995	7.48296	0.01558	7.48387	0.07071	7.485	0.01977
7.48933	0.01936	7.49138	0.01472	7.49229	0.06877	7.49342	0.01906
7.49774	0.01881	7.4998	0.01389	7.5007	0.0669	7.50184	0.01839
7.50616	0.01829	7.50821	0.01309	7.50912	0.0651	7.51025	0.01775
7.51458	0.01781	7.51663	0.01233	7.51754	0.06338	7.51867	0.01716
7.523	0.01736	7.52505	0.0116	7.52595	0.06173	7.52709	0.0166
7.53141	0.01693	7.53346	0.0109	7.53437	0.06015	7.53551	0.01608
7.53983	0.01653	7.54188	0.01024	7.54279	0.05863	7.54392	0.01559
7.54825	0.01615	7.5503	0.00961	7.55121	0.05717	7.55234	0.01513
7.55667	0.01578	7.55872	0.00902	7.55962	0.05578	7.56076	0.0147
7.56508	0.01544	7.56713	0.00846	7.56804	0.05443	7.56918	0.01429
7.5735	0.0151	7.57555	0.00794	7.57646	0.05315	7.57759	0.01391
7.58192	0.01478	7.58397	0.00745	7.58488	0.05191	7.58601	0.01355
7.59033	0.01446	7.59239	0.00699	7.59329	0.05072	7.59443	0.01321
7.59875	0.01415	7.6008	0.00656	7.60171	0.04958	7.60284	0.01288
7.60717	0.01385	7.60922	0.00616	7.61013	0.04848	7.61126	0.01256
7.61559	0.01355	7.61764	0.00579	7.61854	0.04741	7.61968	0.01226
7.624	0.01325	7.62605	0.00544	7.62696	0.04639	7.6281	0.01197
7.63242	0.01296	7.63447	0.00512	7.63538	0.04539	7.63651	0.01169
7.64084	0.01267	7.64289	0.00482	7.6438	0.04443	7.64493	0.01141
7.64926	0.01239	7.65131	0.00454	7.65221	0.04349	7.65335	0.01114
7.65767	0.01211	7.65972	0.00427	7.66063	0.04259	7.66177	0.01088
7.66609	0.01183	7.66814	0.00403	7.66905	0.0417	7.67018	0.01062
7.67451	0.01156	7.67656	0.00379	7.67747	0.04084	7.6786	0.01037
7.68292	0.01129	7.68498	0.00358	7.68588	0.04	7.68702	0.01012
7.69134	0.01103	7.69339	0.00337	7.6943	0.03919	7.69543	0.00987
7.69976	0.01077	7.70181	0.00318	7.70272	0.03839	7.70385	0.00963
7.70818	0.01052	7.71023	0.00299	7.71114	0.03761	7.71227	0.0094
7.71659	0.01028	7.71864	0.00282	7.71955	0.03685	7.72069	0.00916
7.72501	0.01004	7.72706	0.00265	7.72797	0.03611	7.7291	0.00894
7.73343	0.00982	7.73548	0.00249	7.73639	0.03539	7.73752	0.00871
7.74185	0.0096	7.7439	0.00233	7.7448	0.03468	7.74594	0.0085
7.75026	0.00939	7.75231	0.00218	7.75322	0.03399	7.75436	0.00828
7.75868	0.00919	7.76073	0.00204	7.76164	0.03332	7.76277	0.00807
7.7671	0.00899	7.76915	0.0019	7.77006	0.03267	7.77119	0.00787
7.77551	0.0088	7.77757	0.00177	7.77847	0.03203	7.77961	0.00766
7.78393	0.00862	7.78598	0.00164	7.78689	0.03141	7.78802	0.00747
7.79235	0.00845	7.7944	0.00151	7.79531	0.03081	7.79644	0.00728
7.80077	0.00829	7.80282	0.00139	7.80373	0.03023	7.80486	0.00709
7.80918	0.00813	7.81123	0.00128	7.81214	0.02966	7.81328	0.00691
7.8176	0.00799	7.81965	0.00116	7.82056	0.02911	7.82169	0.00674
7.82602	0.00785	7.82807	0.00106	7.82898	0.02858	7.83011	0.00656
7.83444	0.00772	7.83649	0.000950056	7.83739	0.02806	7.83853	0.0064
7.84285	0.00759	7.8449	0.000849046	7.84581	0.02756	7.84695	0.00624
7.85127	0.00748	7.85332	0.000752207	7.85423	0.02708	7.85536	0.00608
7.85969	0.00737	7.86174	0.000659485	7.86265	0.02661	7.86378	0.00593
7.86811	0.00727	7.87016	0.000570681	7.87106	0.02617	7.8722	0.00578
7.87652	0.00717	7.87857	0.000485472	7.87948	0.02573	7.88061	0.00564
7.88494	0.00709	7.88699	0.00040344	7.8879	0.02532	7.88903	0.00551
7.89336	0.00702	7.89541	0.0003242	7.89632	0.02492	7.89745	0.00538
7.90177	0.00695	7.90382	0.000247522	7.90473	0.02454	7.90587	0.00526
7.91019	0.00689	7.91224	0.000173328	7.91315	0.02418	7.91428	0.00514
7.91861	0.00684	7.92066	0.00010156	7.92157	0.02383	7.9227	0.00504
7.92703	0.0068	7.92908	3.20615e-05	7.92998	0.0235	7.93112	0.00494
7.93544	0.00676	7.93749	-3.53822e-05	7.9384	0.02319	7.93954	0.00485
7.94386	0.00673	7.94591	-0.000100904	7.94682	0.02289	7.94795	0.00476
7.95228	0.0067	7.95433	-0.00016448	7.95524	0.02261	7.95637	0.00469
7.9607	0.00668	7.96275	-0.000226048	7.96365	0.02233	7.96479	0.00462
7.96911	0.00666	7.97116	-0.000285674	7.97207	0.02208	7.9732	0.00457
7.97753	0.00664	7.97958	-0.00034357	7.98049	0.02183	7.98162	0.00451
7.98595	0.00662	7.988	-0.000399942	7.98891	0.02159	7.99004	0.00447
7.99436	0.00659	7.99641	-0.000454833	7.99732	0.02136	7.99846	0.00443
8.00278	0.00657	8.00483	-0.00050805	8.00574	0.02114	8.00687	0.00439
8.0112	0.00654	8.01325	-0.000559192	8.01416	0.02092	8.01529	0.00436
8.01962	0.0065	8.02167	-0.000607786	8.02257	0.0207	8.02371	0.00433
8.02803	0.00646	8.03008	-0.000653455	8.03099	0.02048	8.03213	0.00431
8.03645	0.00641	8.0385	-0.000695961	8.03941	0.02027	8.04054	0.00428
8.04487	0.00636	8.04692	-0.000735161	8.04783	0.02005	8.04896	0.00426
8.05329	0.00629	8.05534	-0.000770921	8.05624	0.01984	8.05738	0.00423
8.0617	0.00623	8.06375	-0.000803069	8.06466	0.01962	8.06579	0.00419
8.07012	0.00615	8.07217	-0.000831398	8.07308	0.0194	8.07421	0.00416
8.07854	0.00607	8.08059	-0.000855702	8.0815	0.01917	8.08263	0.00412
8.08695	0.00599	8.089	-0.000875773	8.08991	0.01895	8.09105	0.00407
8.09537	0.0059	8.09742	-0.000891399	8.09833	0.01872	8.09946	0.00402
8.10379	0.00581	8.10584	-0.000902402	8.10675	0.01849	8.10788	0.00396
8.11221	0.00573	8.11426	-0.00090865	8.11516	0.01827	8.1163	0.0039
8.12062	0.00564	8.12267	-0.00091004	8.12358	0.01804	8.12472	0.00384
8.12904	0.00555	8.13109	-0.000906483	8.132	0.01781	8.13313	0.00377
8.13746	0.00546	8.13951	-0.000897968	8.14042	0.01759	8.14155	0.0037
8.14588	0.00538	8.14793	-0.000884638	8.14883	0.01736	8.14997	0.00363
8.15429	0.0053	8.15634	-0.00086681	8.15725	0.01714	8.15838	0.00355
8.16271	0.00522	8.16476	-0.000844956	8.16567	0.01693	8.1668	0.00348
8.17113	0.00514	8.17318	-0.000819647	8.17409	0.01671	8.17522	0.0034
8.17954	0.00507	8.18159	-0.000791536	8.1825	0.01651	8.18364	0.00333
8.18796	0.005	8.19001	-0.000761422	8.19092	0.0163	8.19205	0.00325
8.19638	0.00493	8.19843	-0.000730283	8.19934	0.0161	8.20047	0.00318
8.2048	0.00487	8.20685	-0.000699218	8.20775	0.01591	8.20889	0.00311
8.21321	0.00481	8.21526	-0.000669345	8.21617	0.01572	8.21731	0.00304
8.22163	0.00475	8.22368	-0.000641712	8.22459	0.01553	8.22572	0.00297
8.23005	0.0047	8.2321	-0.000617277	8.23301	0.01534	8.23414	0.00291
8.23847	0.00465	8.24052	-0.00059694	8.24142	0.01516	8.24256	0.00285
8.24688	0.0046	8.24893	-0.000581646	8.24984	0.01498	8.25097	0.00279
8.2553	0.00455	8.25735	-0.000572403	8.25826	0.0148	8.25939	0.00274
8.26372	0.0045	8.26577	-0.000570144	8.26668	0.01463	8.26781	0.00269
8.27213	0.00445	8.27418	-0.000575535	8.27509	0.01445	8.27623	0.00264
8.28055	0.00441	8.2826	-0.000588889	8.28351	0.01428	8.28464	0.00259
8.28897	0.00436	8.29102	-0.000610188	8.29193	0.01411	8.29306	0.00254
8.29739	0.00431	8.29944	-0.000639138	8.30034	0.01394	8.30148	0.00249
8.3058	0.00426	8.30785	-0.000675196	8.30876	0.01378	8.3099	0.00244
8.31422	0.00422	8.31627	-0.000717605	8.31718	0.01361	8.31831	0.0024
8.32264	0.00417	8.32469	-0.00076548	8.3256	0.01345	8.32673	0.00235
8.33106	0.00412	8.33311	-0.000817947	8.33401	0.01328	8.33515	0.00231
8.33947	0.00407	8.34152	-0.000874209	8.34243	0.01312	8.34356	0.00226
8.34789	0.00401	8.34994	-0.000933591	8.35085	0.01296	8.35198	0.00222
8.35631	0.00396	8.35836	-0.000995574	8.35927	0.0128	8.3604	0.00217
8.36472	0.0039	8.36677	-0.00106	8.36768	0.01265	8.36882	0.00213
8.37314	0.00385	8.37519	-0.00113	8.3761	0.0125	8.37723	0.00208
8.38156	0.00379	8.38361	-0.00119	8.38452	0.01235	8.38565	0.00204
8.38998	0.00372	8.39203	-0.00126	8.39293	0.0122	8.39407	0.00199
8.39839	0.00366	8.40044	-0.00133	8.40135	0.01206	8.40249	0.00194
8.40681	0.0036	8.40886	-0.0014	8.40977	0.01191	8.4109	0.00189
8.41523	0.00353	8.41728	-0.00148	8.41819	0.01178	8.41932	0.00185
8.42365	0.00346	8.4257	-0.00155	8.4266	0.01164	8.42774	0.00179
8.43206	0.0034	8.43411	-0.00162	8.43502	0.01151	8.43615	0.00174
8.44048	0.00333	8.44253	-0.00169	8.44344	0.01138	8.44457	0.00169
8.4489	0.00327	8.45095	-0.00177	8.45186	0.01126	8.45299	0.00163
8.45731	0.0032	8.45937	-0.00184	8.46027	0.01113	8.46141	0.00158
8.46573	0.00314	8.46778	-0.00192	8.46869	0.01101	8.46982	0.00152
8.47415	0.00308	8.4762	-0.00199	8.47711	0.0109	8.47824	0.00146
8.48257	0.00302	8.48462	-0.00207	8.48552	0.01079	8.48666	0.0014
8.49098	0.00296	8.49303	-0.00214	8.49394	0.01068	8.49508	0.00134
8.4994	0.00291	8.50145	-0.00222	8.50236	0.01057	8.50349	0.00129
8.50782	0.00285	8.50987	-0.00229	8.51078	0.01047	8.51191	0.00123
8.51624	0.0028	8.51829	-0.00236	8.51919	0.01037	8.52033	0.00118
8.52465	0.00275	8.5267	-0.00243	8.52761	0.01027	8.52874	0.00112
8.53307	0.00271	8.53512	-0.0025	8.53603	0.01017	8.53716	0.00107
8.54149	0.00266	8.54354	-0.00257	8.54445	0.01008	8.54558	0.00102
8.5499	0.00262	8.55196	-0.00263	8.55286	0.00999	8.554	0.000970124
8.55832	0.00258	8.56037	-0.00269	8.56128	0.0099	8.56241	0.00092369
8.56674	0.00254	8.56879	-0.00275	8.5697	0.00982	8.57083	0.000879944
8.57516	0.00251	8.57721	-0.00281	8.57811	0.00974	8.57925	0.00083913
8.58357	0.00247	8.58562	-0.00286	8.58653	0.00966	8.58767	0.000801276
8.59199	0.00244	8.59404	-0.00291	8.59495	0.00958	8.59608	0.000766252
8.60041	0.0024	8.60246	-0.00296	8.60337	0.0095	8.6045	0.000733832
8.60883	0.00237	8.61088	-0.00301	8.61178	0.00942	8.61292	0.000703752
8.61724	0.00234	8.61929	-0.00305	8.6202	0.00935	8.62133	0.000675764
8.62566	0.00231	8.62771	-0.00309	8.62862	0.00928	8.62975	0.000649642
8.63408	0.00228	8.63613	-0.00313	8.63704	0.00921	8.63817	0.000625175
8.64249	0.00225	8.64455	-0.00317	8.64545	0.00914	8.64659	0.00060216
8.65091	0.00222	8.65296	-0.00321	8.65387	0.00907	8.655	0.000580418
8.65933	0.00219	8.66138	-0.00324	8.66229	0.00901	8.66342	0.000559789
8.66775	0.00217	8.6698	-0.00328	8.6707	0.00894	8.67184	0.000540151
8.67616	0.00214	8.67821	-0.00331	8.67912	0.00888	8.68026	0.00052142
8.68458	0.00211	8.68663	-0.00334	8.68754	0.00882	8.68867	0.000503495
8.693	0.00208	8.69505	-0.00337	8.69596	0.00876	8.69709	0.000486188
8.70142	0.00205	8.70347	-0.0034	8.70437	0.0087	8.70551	0.000469201
8.70983	0.00203	8.71188	-0.00343	8.71279	0.00864	8.71393	0.000452188
8.71825	0.002	8.7203	-0.00345	8.72121	0.00858	8.72234	0.000434833
8.72667	0.00197	8.72872	-0.00348	8.72963	0.00852	8.73076	0.000416927
8.73508	0.00194	8.73714	-0.00351	8.73804	0.00846	8.73918	0.000398344
8.7435	0.00192	8.74555	-0.00354	8.74646	0.0084	8.74759	0.000379003
8.75192	0.00189	8.75397	-0.00357	8.75488	0.00835	8.75601	0.000358907
8.76034	0.00186	8.76239	-0.00359	8.76329	0.00829	8.76443	0.000338193
8.76875	0.00183	8.7708	-0.00362	8.77171	0.00824	8.77285	0.000317051
8.77717	0.00181	8.77922	-0.00365	8.78013	0.00818	8.78126	0.000295595
8.78559	0.00178	8.78764	-0.00367	8.78855	0.00813	8.78968	0.000273819
8.79401	0.00175	8.79606	-0.0037	8.79696	0.00807	8.7981	0.000251655
8.80242	0.00173	8.80447	-0.00372	8.80538	0.00802	8.80652	0.000229074
8.81084	0.0017	8.81289	-0.00375	8.8138	0.00797	8.81493	0.000206106
8.81926	0.00167	8.82131	-0.00377	8.82222	0.00792	8.82335	0.000182772
8.82767	0.00165	8.82973	-0.0038	8.83063	0.00788	8.83177	0.000159037
8.83609	0.00162	8.83814	-0.00382	8.83905	0.00783	8.84018	0.0001349
8.84451	0.0016	8.84656	-0.00384	8.84747	0.00779	8.8486	0.000110509
8.85293	0.00158	8.85498	-0.00387	8.85588	0.00774	8.85702	8.61429e-05
8.86134	0.00155	8.86339	-0.00389	8.8643	0.0077	8.86544	6.20947e-05
8.86976	0.00153	8.87181	-0.00391	8.87272	0.00766	8.87385	3.85644e-05
8.87818	0.00151	8.88023	-0.00393	8.88114	0.00762	8.88227	1.5601e-05
8.8866	0.00149	8.88865	-0.00396	8.88955	0.00758	8.89069	-6.89563e-06
8.89501	0.00147	8.89706	-0.00398	8.89797	0.00754	8.89911	-2.90864e-05
8.90343	0.00145	8.90548	-0.004	8.90639	0.00751	8.90752	-5.10914e-05
8.91185	0.00143	8.9139	-0.00402	8.91481	0.00747	8.91594	-7.29404e-05
8.92026	0.00142	8.92232	-0.00404	8.92322	0.00744	8.92436	-9.45567e-05
8.92868	0.0014	8.93073	-0.00406	8.93164	0.0074	8.93277	-0.000115786
8.9371	0.00138	8.93915	-0.00408	8.94006	0.00737	8.94119	-0.000136501
8.94552	0.00137	8.94757	-0.0041	8.94848	0.00733	8.94961	-0.000156698
8.95393	0.00136	8.95598	-0.00411	8.95689	0.0073	8.95803	-0.000176494
8.96235	0.00135	8.9644	-0.00413	8.96531	0.00727	8.96644	-0.000196035
8.97077	0.00134	8.97282	-0.00415	8.97373	0.00724	8.97486	-0.00021539
8.97919	0.00133	8.98124	-0.00416	8.98214	0.00721	8.98328	-0.000234511
8.9876	0.00132	8.98965	-0.00418	8.99056	0.00718	8.9917	-0.000253278
8.99602	0.00131	8.99807	-0.0042	8.99898	0.00715	9.00011	-0.000271595
9.00444	0.0013	9.00649	-0.00421	9.0074	0.00713	9.00853	-0.000289415
9.01285	0.00129	9.01491	-0.00423	9.01581	0.0071	9.01695	-0.000306738
9.02127	0.00128	9.02332	-0.00425	9.02423	0.00708	9.02536	-0.000323615
9.02969	0.00128	9.03174	-0.00426	9.03265	0.00706	9.03378	-0.00034014
9.03811	0.00127	9.04016	-0.00428	9.04107	0.00703	9.0422	-0.000356404
9.04652	0.00127	9.04857	-0.00429	9.04948	0.00701	9.05062	-0.000372482
9.05494	0.00126	9.05699	-0.00431	9.0579	0.00699	9.05903	-0.000388399
9.06336	0.00126	9.06541	-0.00432	9.06632	0.00697	9.06745	-0.000404061
9.07178	0.00126	9.07383	-0.00434	9.07473	0.00696	9.07587	-0.000419251
9.08019	0.00126	9.08224	-0.00436	9.08315	0.00694	9.08429	-0.000433724
9.08861	0.00126	9.09066	-0.00437	9.09157	0.00692	9.0927	-0.000447307
9.09703	0.00126	9.09908	-0.00439	9.09999	0.00691	9.10112	-0.000459927
9.10544	0.00126	9.1075	-0.0044	9.1084	0.0069	9.10954	-0.000471614
9.11386	0.00126	9.11591	-0.00441	9.11682	0.00688	9.11795	-0.000482511
9.12228	0.00127	9.12433	-0.00443	9.12524	0.00687	9.12637	-0.000492859
9.1307	0.00127	9.13275	-0.00444	9.13366	0.00686	9.13479	-0.000502954
9.13911	0.00127	9.14116	-0.00445	9.14207	0.00685	9.14321	-0.000513055
9.14753	0.00128	9.14958	-0.00446	9.15049	0.00684	9.15162	-0.000523302
9.15595	0.00128	9.158	-0.00447	9.15891	0.00683	9.16004	-0.000533679
9.16437	0.00128	9.16642	-0.00448	9.16732	0.00682	9.16846	-0.000544057
9.17278	0.00129	9.17483	-0.0045	9.17574	0.00682	9.17688	-0.000554269
9.1812	0.00129	9.18325	-0.00451	9.18416	0.00681	9.18529	-0.000564198
9.18962	0.00129	9.19167	-0.00452	9.19258	0.0068	9.19371	-0.000573853
9.19804	0.00129	9.20009	-0.00453	9.20099	0.00679	9.20213	-0.000583392
9.20645	0.0013	9.2085	-0.00454	9.20941	0.00678	9.21054	-0.000593054
9.21487	0.0013	9.21692	-0.00455	9.21783	0.00678	9.21896	-0.000603057
9.22329	0.0013	9.22534	-0.00456	9.22625	0.00677	9.22738	-0.000613515
9.2317	0.00131	9.23375	-0.00457	9.23466	0.00676	9.2358	-0.000624438
9.24012	0.00131	9.24217	-0.00458	9.24308	0.00675	9.24421	-0.0006358
9.24854	0.00132	9.25059	-0.0046	9.2515	0.00674	9.25263	-0.000647607
9.25696	0.00132	9.25901	-0.00461	9.25991	0.00673	9.26105	-0.000659893
9.26537	0.00133	9.26742	-0.00463	9.26833	0.00672	9.26947	-0.000672652
9.27379	0.00134	9.27584	-0.00464	9.27675	0.00671	9.27788	-0.000685834
9.28221	0.00134	9.28426	-0.00466	9.28517	0.0067	9.2863	-0.000699394
9.29063	0.00135	9.29268	-0.00467	9.29358	0.00668	9.29472	-0.000713319
9.29904	0.00136	9.30109	-0.00469	9.302	0.00667	9.30313	-0.00072759
9.30746	0.00137	9.30951	-0.00471	9.31042	0.00666	9.31155	-0.000742136
9.31588	0.00138	9.31793	-0.00472	9.31884	0.00666	9.31997	-0.000756803
9.32429	0.00139	9.32634	-0.00474	9.32725	0.00665	9.32839	-0.000771395
9.33271	0.00141	9.33476	-0.00476	9.33567	0.00664	9.3368	-0.0007857
9.34113	0.00142	9.34318	-0.00477	9.34409	0.00663	9.34522	-0.000799471
9.34955	0.00144	9.3516	-0.00479	9.3525	0.00662	9.35364	-0.00081242
9.35796	0.00146	9.36001	-0.0048	9.36092	0.00662	9.36206	-0.00082427
9.36638	0.00148	9.36843	-0.00482	9.36934	0.00661	9.37047	-0.000834823
9.3748	0.0015	9.37685	-0.00484	9.37776	0.00661	9.37889	-0.000843977
9.38322	0.00152	9.38527	-0.00485	9.38617	0.0066	9.38731	-0.000851723
9.39163	0.00154	9.39368	-0.00486	9.39459	0.0066	9.39572	-0.000858103
9.40005	0.00156	9.4021	-0.00488	9.40301	0.00659	9.40414	-0.000863185
9.40847	0.00159	9.41052	-0.00489	9.41143	0.00659	9.41256	-0.00086706
9.41688	0.00161	9.41893	-0.0049	9.41984	0.00659	9.42098	-0.000869835
9.4253	0.00164	9.42735	-0.00491	9.42826	0.00659	9.42939	-0.000871617
9.43372	0.00166	9.43577	-0.00491	9.43668	0.00658	9.43781	-0.000872463
9.44214	0.00169	9.44419	-0.00492	9.44509	0.00658	9.44623	-0.00087234
9.45055	0.00172	9.4526	-0.00492	9.45351	0.00658	9.45465	-0.000871111
9.45897	0.00175	9.46102	-0.00493	9.46193	0.00657	9.46306	-0.000868607
9.46739	0.00178	9.46944	-0.00493	9.47035	0.00657	9.47148	-0.000864728
9.47581	0.00182	9.47786	-0.00494	9.47876	0.00657	9.4799	-0.000859483
9.48422	0.00185	9.48627	-0.00494	9.48718	0.00657	9.48831	-0.000852928
9.49264	0.00188	9.49469	-0.00494	9.4956	0.00657	9.49673	-0.000845104
9.50106	0.00191	9.50311	-0.00494	9.50402	0.00656	9.50515	-0.000836027
9.50947	0.00194	9.51152	-0.00494	9.51243	0.00656	9.51357	-0.000825717
9.51789	0.00197	9.51994	-0.00493	9.52085	0.00656	9.52198	-0.000814235
9.52631	0.002	9.52836	-0.00492	9.52927	0.00655	9.5304	-0.000801709
9.53473	0.00202	9.53678	-0.00492	9.53768	0.00654	9.53882	-0.000788324
9.54314	0.00204	9.54519	-0.00491	9.5461	0.00654	9.54724	-0.000774365
9.55156	0.00206	9.55361	-0.0049	9.55452	0.00653	9.55565	-0.000760299
9.55998	0.00207	9.56203	-0.00489	9.56294	0.00652	9.56407	-0.000746752
9.5684	0.00208	9.57045	-0.00488	9.57135	0.00651	9.57249	-0.00073433
9.57681	0.00209	9.57886	-0.00488	9.57977	0.0065	9.5809	-0.000723447
9.58523	0.00209	9.58728	-0.00487	9.58819	0.00649	9.58932	-0.000714301
9.59365	0.0021	9.5957	-0.00487	9.59661	0.00647	9.59774	-0.000706958
9.60206	0.0021	9.60411	-0.00486	9.60502	0.00646	9.60616	-0.000701457
9.61048	0.0021	9.61253	-0.00486	9.61344	0.00644	9.61457	-0.000697886
9.6189	0.00209	9.62095	-0.00486	9.62186	0.00643	9.62299	-0.000696391
9.62732	0.00209	9.62937	-0.00487	9.63027	0.00641	9.63141	-0.000697122
9.63573	0.00208	9.63778	-0.00487	9.63869	0.0064	9.63983	-0.000700139
9.64415	0.00207	9.6462	-0.00488	9.64711	0.00638	9.64824	-0.000705303
9.65257	0.00206	9.65462	-0.00489	9.65553	0.00636	9.65666	-0.000712251
9.66099	0.00205	9.66304	-0.0049	9.66394	0.00634	9.66508	-0.000720498
9.6694	0.00204	9.67145	-0.00491	9.67236	0.00632	9.67349	-0.000729615
9.67782	0.00203	9.67987	-0.00493	9.68078	0.0063	9.68191	-0.000739347
9.68624	0.00202	9.68829	-0.00494	9.6892	0.00628	9.69033	-0.000749572
9.69465	0.00201	9.69671	-0.00496	9.69761	0.00626	9.69875	-0.000760193
9.70307	0.002	9.70512	-0.00498	9.70603	0.00624	9.70716	-0.000771035
9.71149	0.00199	9.71354	-0.005	9.71445	0.00622	9.71558	-0.000781837
9.71991	0.00198	9.72196	-0.00502	9.72286	0.0062	9.724	-0.0007923
9.72832	0.00197	9.73037	-0.00504	9.73128	0.00618	9.73242	-0.000802171
9.73674	0.00196	9.73879	-0.00505	9.7397	0.00616	9.74083	-0.000811273
9.74516	0.00195	9.74721	-0.00507	9.74812	0.00614	9.74925	-0.000819539
9.75358	0.00194	9.75563	-0.00509	9.75653	0.00612	9.75767	-0.000827039
9.76199	0.00193	9.76404	-0.0051	9.76495	0.0061	9.76608	-0.000833929
9.77041	0.00191	9.77246	-0.00512	9.77337	0.00608	9.7745	-0.000840352
9.77883	0.0019	9.78088	-0.00513	9.78179	0.00606	9.78292	-0.000846349
9.78724	0.00189	9.7893	-0.00515	9.7902	0.00604	9.79134	-0.000851848
9.79566	0.00188	9.79771	-0.00516	9.79862	0.00602	9.79975	-0.000856726
9.80408	0.00187	9.80613	-0.00517	9.80704	0.00599	9.80817	-0.000860864
9.8125	0.00186	9.81455	-0.00518	9.81545	0.00597	9.81659	-0.000864157
9.82091	0.00185	9.82296	-0.00519	9.82387	0.00595	9.82501	-0.00086654
9.82933	0.00184	9.83138	-0.0052	9.83229	0.00593	9.83342	-0.000868033
9.83775	0.00183	9.8398	-0.00521	9.84071	0.00591	9.84184	-0.000868745
9.84617	0.00182	9.84822	-0.00522	9.84912	0.00589	9.85026	-0.000868773
9.85458	0.00182	9.85663	-0.00523	9.85754	0.00587	9.85868	-0.000868136
9.863	0.00181	9.86505	-0.00524	9.86596	0.00585	9.86709	-0.000866821
9.87142	0.0018	9.87347	-0.00524	9.87438	0.00584	9.87551	-0.0008649
9.87983	0.00179	9.88189	-0.00525	9.88279	0.00582	9.88393	-0.00086253
9.88825	0.00179	9.8903	-0.00526	9.89121	0.0058	9.89234	-0.000859828
9.89667	0.00178	9.89872	-0.00526	9.89963	0.00578	9.90076	-0.000856753
9.90509	0.00178	9.90714	-0.00527	9.90804	0.00576	9.90918	-0.000853147
9.9135	0.00177	9.91555	-0.00528	9.91646	0.00574	9.9176	-0.000848903
9.92192	0.00177	9.92397	-0.00528	9.92488	0.00572	9.92601	-0.000844078
9.93034	0.00176	9.93239	-0.00529	9.9333	0.0057	9.93443	-0.000838879
9.93876	0.00176	9.94081	-0.0053	9.94171	0.00568	9.94285	-0.00083361
9.94717	0.00175	9.94922	-0.0053	9.95013	0.00565	9.95127	-0.00082861
9.95559	0.00175	9.95764	-0.00531	9.95855	0.00563	9.95968	-0.000824156
9.96401	0.00174	9.96606	-0.00531	9.96697	0.00561	9.9681	-0.000820348
9.97242	0.00173	9.97448	-0.00532	9.97538	0.00558	9.97652	-0.000817108
9.98084	0.00173	9.98289	-0.00533	9.9838	0.00556	9.98493	-0.000814265
9.98926	0.00172	9.99131	-0.00533	9.99222	0.00553	9.99335	-0.000811671
9.99768	0.00172	9.99973	-0.00534	10.0006	0.00551	10.0018	-0.000809259
10.0061	0.00172	10.0081	-0.00534	10.0091	0.00548	10.0102	-0.000807026
10.0145	0.00171	10.0166	-0.00534	10.0175	0.00545	10.0186	-0.000804968
10.0229	0.00171	10.025	-0.00535	10.0259	0.00543	10.027	-0.000803009
10.0313	0.00171	10.0334	-0.00535	10.0343	0.0054	10.0354	-0.000800973
10.0398	0.00172	10.0418	-0.00536	10.0427	0.00537	10.0439	-0.000798603
10.0482	0.00172	10.0502	-0.00536	10.0511	0.00534	10.0523	-0.000795654
10.0566	0.00174	10.0587	-0.00536	10.0596	0.00532	10.0607	-0.000791982
10.065	0.00176	10.0671	-0.00536	10.068	0.00529	10.0691	-0.000787559
10.0734	0.00179	10.0755	-0.00536	10.0764	0.00526	10.0775	-0.000782419
10.0818	0.00184	10.0839	-0.00536	10.0848	0.00523	10.0859	-0.000776614
10.0903	0.00191	10.0923	-0.00536	10.0932	0.00521	10.0944	-0.000770148
10.0987	0.00202	10.1007	-0.00536	10.1016	0.00518	10.1028	-0.000762859
10.1071	0.00215	10.1091	-0.00535	10.1101	0.00515	10.1112	-0.000754343
10.1155	0.00234	10.1176	-0.00534	10.1185	0.00512	10.1196	-0.000743938
10.1239	0.00258	10.126	-0.00532	10.1269	0.00509	10.128	-0.000730713
10.1324	0.00289	10.1344	-0.0053	10.1353	0.00506	10.1364	-0.000713449
10.1408	0.00328	10.1428	-0.00528	10.1437	0.00503	10.1449	-0.000690659
10.1492	0.00375	10.1512	-0.00524	10.1522	0.005	10.1533	-0.000660603
10.1576	0.00432	10.1597	-0.00519	10.1606	0.00497	10.1617	-0.000621279
10.166	0.00499	10.1681	-0.00512	10.169	0.00494	10.1701	-0.000570408
10.1744	0.00575	10.1765	-0.00504	10.1774	0.00491	10.1785	-0.000505489
10.1829	0.0066	10.1849	-0.00492	10.1858	0.00488	10.1869	-0.000423953
10.1913	0.00753	10.1933	-0.00479	10.1942	0.00485	10.1954	-0.00032341
10.1997	0.0085	10.2017	-0.00461	10.2027	0.00481	10.2038	-0.000201876
10.2081	0.0095	10.2102	-0.0044	10.2111	0.00478	10.2122	-5.7962e-05
10.2165	0.0105	10.2186	-0.00415	10.2195	0.00475	10.2206	0.000108889
10.2249	0.01145	10.227	-0.00386	10.2279	0.00472	10.229	0.000298094
10.2334	0.01234	10.2354	-0.00353	10.2363	0.00469	10.2375	0.000507678
10.2418	0.01311	10.2438	-0.00316	10.2447	0.00466	10.2459	0.000734146
10.2502	0.01377	10.2523	-0.00276	10.2531	0.00463	10.2543	0.000972475
10.2586	0.01427	10.2607	-0.00234	10.2616	0.0046	10.2627	0.00122
10.267	0.01463	10.2691	-0.00191	10.27	0.00457	10.2711	0.00146
10.2754	0.01481	10.2775	-0.00149	10.2784	0.00455	10.2795	0.00169
10.2839	0.01484	10.2859	-0.00108	10.2868	0.00452	10.288	0.0019
10.2923	0.0147	10.2943	-0.000707527	10.2952	0.00449	10.2964	0.00209
10.3007	0.01443	10.3027	-0.000377147	10.3037	0.00447	10.3048	0.00225
10.3091	0.01404	10.3112	-0.000101414	10.3121	0.00444	10.3132	0.00238
10.3175	0.01354	10.3196	0.000111545	10.3205	0.00442	10.3216	0.00247
10.326	0.01298	10.328	0.000255646	10.3289	0.0044	10.33	0.00252
10.3344	0.01236	10.3364	0.000327546	10.3373	0.00438	10.3385	0.00253
10.3428	0.0117	10.3448	0.000327382	10.3457	0.00436	10.3469	0.0025
10.3512	0.01104	10.3532	0.000258778	10.3542	0.00434	10.3553	0.00244
10.3596	0.01038	10.3617	0.000128161	10.3626	0.00432	10.3637	0.00235
10.368	0.00975	10.3701	-5.61622e-05	10.371	0.0043	10.3721	0.00223
10.3765	0.00914	10.3785	-0.000284801	10.3794	0.00428	10.3805	0.00209
10.3849	0.00859	10.3869	-0.00054787	10.3878	0.00427	10.389	0.00194
10.3933	0.00809	10.3953	-0.000835489	10.3963	0.00425	10.3974	0.00178
10.4017	0.00768	10.4038	-0.00114	10.4047	0.00423	10.4058	0.00161
10.4101	0.00735	10.4122	-0.00145	10.4131	0.00422	10.4142	0.00144
10.4185	0.00715	10.4206	-0.00176	10.4215	0.0042	10.4226	0.00128
10.427	0.0071	10.429	-0.00206	10.4299	0.00418	10.4311	0.00112
10.4354	0.00722	10.4374	-0.00235	10.4383	0.00416	10.4395	0.000972687
10.4438	0.00756	10.4458	-0.00262	10.4467	0.00414	10.4479	0.000835662
10.4522	0.00815	10.4543	-0.00288	10.4552	0.00412	10.4563	0.000711988
10.4606	0.009	10.4627	-0.00311	10.4636	0.0041	10.4647	0.000603366
10.469	0.01014	10.4711	-0.00332	10.472	0.00408	10.4731	0.000511495
10.4775	0.01154	10.4795	-0.00351	10.4804	0.00407	10.4816	0.000438275
10.4859	0.01314	10.4879	-0.00367	10.4888	0.00405	10.49	0.000385918
10.4943	0.01485	10.4963	-0.0038	10.4972	0.00403	10.4984	0.000356863
10.5027	0.01656	10.5048	-0.00391	10.5057	0.00401	10.5068	0.000353547
10.5111	0.01813	10.5132	-0.00399	10.5141	0.004	10.5152	0.000378212
10.5196	0.01947	10.5216	-0.00403	10.5225	0.00398	10.5236	0.000432837
10.528	0.02049	10.53	-0.00405	10.5309	0.00397	10.5321	0.000518977
10.5364	0.02113	10.5384	-0.00403	10.5393	0.00396	10.5405	0.000637404
10.5448	0.02137	10.5468	-0.00398	10.5478	0.00394	10.5489	0.000787699
10.5532	0.02125	10.5553	-0.00389	10.5562	0.00393	10.5573	0.000967955
10.5616	0.02083	10.5637	-0.00378	10.5646	0.00392	10.5657	0.00117
10.5701	0.02018	10.5721	-0.00364	10.573	0.0039	10.5741	0.0014
10.5785	0.0194	10.5805	-0.00348	10.5814	0.00389	10.5826	0.00165
10.5869	0.01855	10.5889	-0.0033	10.5898	0.00387	10.591	0.0019
10.5953	0.01768	10.5974	-0.00311	10.5983	0.00385	10.5994	0.00215
10.6037	0.01684	10.6058	-0.00292	10.6067	0.00382	10.6078	0.00239
10.6121	0.01604	10.6142	-0.00273	10.6151	0.0038	10.6162	0.00261
10.6206	0.01529	10.6226	-0.00256	10.6235	0.00377	10.6247	0.00282
10.629	0.01459	10.631	-0.00241	10.6319	0.00373	10.6331	0.00299
10.6374	0.01393	10.6394	-0.00228	10.6403	0.00369	10.6415	0.00313
10.6458	0.0133	10.6479	-0.00217	10.6488	0.00365	10.6499	0.00323
10.6542	0.01269	10.6563	-0.00209	10.6572	0.0036	10.6583	0.00329
10.6626	0.01209	10.6647	-0.00204	10.6656	0.00356	10.6667	0.00332
10.6711	0.0115	10.6731	-0.00202	10.674	0.00351	10.6752	0.00332
10.6795	0.0109	10.6815	-0.00202	10.6824	0.00346	10.6836	0.00329
10.6879	0.0103	10.6899	-0.00204	10.6908	0.00341	10.692	0.00322
10.6963	0.00968	10.6984	-0.00208	10.6993	0.00336	10.7004	0.00314
10.7047	0.00906	10.7068	-0.00213	10.7077	0.00332	10.7088	0.00304
10.7132	0.00843	10.7152	-0.00219	10.7161	0.00327	10.7172	0.00292
10.7216	0.0078	10.7236	-0.00226	10.7245	0.00323	10.7256	0.00279
10.73	0.00717	10.732	-0.00233	10.7329	0.00319	10.7341	0.00265
10.7384	0.00656	10.7404	-0.00241	10.7414	0.00315	10.7425	0.00249
10.7468	0.00596	10.7489	-0.0025	10.7498	0.00311	10.7509	0.00233
10.7552	0.00539	10.7573	-0.00259	10.7582	0.00308	10.7593	0.00216
10.7637	0.00485	10.7657	-0.00269	10.7666	0.00305	10.7677	0.00199
10.7721	0.00434	10.7741	-0.0028	10.775	0.00303	10.7762	0.0018
10.7805	0.00387	10.7825	-0.00292	10.7834	0.003	10.7846	0.0016
10.7889	0.00344	10.791	-0.00305	10.7919	0.00298	10.793	0.0014
10.7973	0.00306	10.7994	-0.00319	10.8003	0.00296	10.8014	0.0012
10.8057	0.00272	10.8078	-0.00335	10.8087	0.00295	10.8098	0.000986047
10.8141	0.00243	10.8162	-0.00352	10.8171	0.00293	10.8182	0.000778293
10.8226	0.00217	10.8246	-0.00369	10.8255	0.00292	10.8267	0.000575813
10.831	0.00196	10.833	-0.00387	10.8339	0.0029	10.8351	0.000382765
10.8394	0.00177	10.8415	-0.00405	10.8424	0.00289	10.8435	0.000203148
10.8478	0.00162	10.8499	-0.00423	10.8508	0.00288	10.8519	4.05334e-05
10.8562	0.0015	10.8583	-0.0044	10.8592	0.00287	10.8603	-0.00010216
10.8647	0.00139	10.8667	-0.00456	10.8676	0.00287	10.8688	-0.000222926
10.8731	0.0013	10.8751	-0.00472	10.876	0.00286	10.8772	-0.00032089
10.8815	0.00122	10.8835	-0.00486	10.8844	0.00285	10.8856	-0.000396386
10.8899	0.00115	10.892	-0.00498	10.8929	0.00285	10.894	-0.000450886
10.8983	0.00109	10.9004	-0.00509	10.9013	0.00284	10.9024	-0.00048686
10.9067	0.00103	10.9088	-0.0052	10.9097	0.00284	10.9108	-0.00050752
10.9152	0.0009746	10.9172	-0.00529	10.9181	0.00284	10.9192	-0.000516462
10.9236	0.000916582	10.9256	-0.00536	10.9265	0.00283	10.9277	-0.000517248
10.932	0.000857882	10.934	-0.00543	10.935	0.00284	10.9361	-0.000512834
10.9404	0.000798316	10.9425	-0.00546	10.9434	0.00284	10.9445	-0.000504733
10.9488	0.000738128	10.9509	-0.00544	10.9518	0.00284	10.9529	-0.00049225
10.9573	0.000677639	10.9593	-0.00531	10.9602	0.00285	10.9613	-0.000472775
10.9657	0.000617291	10.9677	-0.00504	10.9686	0.00286	10.9698	-0.000443806
10.9741	0.00055774	10.9761	-0.00464	10.977	0.00287	10.9782	-0.000405542
10.9825	0.000499507	10.9846	-0.00415	10.9855	0.00288	10.9866	-0.000361556
10.9909	0.000442978	10.993	-0.00364	10.9939	0.0029	10.995	-0.000316764
10.9993	0.00038834	11.0014	-0.00316	11.0023	0.00292	11.0034	-0.000274911
11.0077	0.000335618			11.0107	0.00294
11.0162	0.000284801			11.0191	0.00296
11.0246	0.000235972			11.0275	0.00298
11.033	0.00018931			11.036	0.003
11.0414	0.000144951			11.0444	0.00301
11.0498	0.000102865			11.0528	0.00303
11.0582	6.29358e-05			11.0612	0.00304
11.0667	2.51404e-05			11.0696	0.00305
11.0751	-1.04057e-05			11.078	0.00305
11.0835	-4.35417e-05			11.0865	0.00305
11.0919	-7.41337e-05			11.0949	0.00305
11.1003	-0.000102078			11.1033	0.00304
11.1088	-0.000127271			11.1117	0.00303
11.1172	-0.000149553			11.1201	0.00301
11.1256	-0.000168622			11.1286	0.00298
11.134	-0.000183981			11.137	0.00296
11.1424	-0.00019499			11.1454	0.00293
11.1508	-0.000201089			11.1538	0.0029
11.1593	-0.00020207			11.1622	0.00287
11.1677	-0.000198169			11.1706	0.00284
11.1761	-0.000189938			11.1791	0.00281
11.1845	-0.000178077			11.1875	0.00278
11.1929	-0.000163353			11.1959	0.00275
11.2013	-0.000146584			11.2043	0.00272
11.2098	-0.000128678			11.2127	0.00269
11.2182	-0.000110646			11.2211	0.00267
11.2266	-9.35446e-05			11.2296	0.00264
11.235	-7.83938e-05			11.238	0.00262
11.2434	-6.61972e-05			11.2464	0.0026
11.2518	-5.80582e-05			11.2548	0.00258
11.2603	-5.52634e-05			11.2632	0.00257
11.2687	-5.91954e-05			11.2716	0.00255
11.2771	-7.1052e-05			11.2801	0.00254
11.2855	-9.15251e-05			11.2885	0.00252
11.2939	-0.000120673			11.2969	0.00251
11.3024	-0.00015804			11.3053	0.00249
11.3108	-0.000202841			11.3137	0.00247
11.3192	-0.000254067			11.3222	0.00246
11.3276	-0.000310483			11.3306	0.00244
11.336	-0.000370615			11.339	0.00241
11.3444	-0.000432816			11.3474	0.00239
11.3529	-0.000495439			11.3558	0.00237
11.3613	-0.000557			11.3642	0.00234
11.3697	-0.000616268			11.3727	0.00232
11.3781	-0.000672306			11.3811	0.00229
11.3865	-0.000724453			11.3895	0.00226
11.3949	-0.000772228			11.3979	0.00224
11.4034	-0.000815268			11.4063	0.00221
11.4118	-0.000853368			11.4147	0.00219
11.4202	-0.000886572			11.4231	0.00217
11.4286	-0.000915164			11.4316	0.00215
11.437	-0.000939584			11.44	0.00214
11.4454	-0.000960328			11.4484	0.00212
11.4539	-0.000977869			11.4568	0.00211
11.4623	-0.000992623			11.4652	0.0021
11.4707	-0.001			11.4737	0.00209
11.4791	-0.00102			11.4821	0.00209
11.4875	-0.00102			11.4905	0.00208
11.496	-0.00103			11.4989	0.00207
11.5044	-0.00104			11.5073	0.00207
11.5128	-0.00104			11.5158	0.00207
11.5212	-0.00105			11.5242	0.00206
11.5296	-0.00105			11.5326	0.00206
11.538	-0.00105			11.541	0.00205
11.5465	-0.00106			11.5494	0.00205
11.5549	-0.00106			11.5578	0.00204
11.5633	-0.00106			11.5663	0.00203
11.5717	-0.00107			11.5747	0.00202
11.5801	-0.00107			11.5831	0.00201
11.5885	-0.00107			11.5915	0.002
11.597	-0.00107			11.5999	0.00199
11.6054	-0.00108			11.6083	0.00198
11.6138	-0.00108			11.6167	0.00196
11.6222	-0.00108			11.6252	0.00195
11.6306	-0.00109			11.6336	0.00193
11.639	-0.00109			11.642	0.00192
11.6475	-0.00109			11.6504	0.0019
11.6559	-0.0011			11.6588	0.00189
11.6643	-0.0011			11.6673	0.00187
11.6727	-0.0011			11.6757	0.00186
11.6811	-0.00111			11.6841	0.00184
11.6896	-0.00111			11.6925	0.00183
11.698	-0.00111			11.7009	0.00182
11.7064	-0.00111			11.7093	0.0018
11.7148	-0.00112			11.7178	0.00179
11.7232	-0.00112			11.7262	0.00178
11.7316	-0.00112			11.7346	0.00177
11.7401	-0.00112			11.743	0.00176
11.7485	-0.00113			11.7514	0.00175
11.7569	-0.00113			11.7599	0.00175
11.7653	-0.00113			11.7683	0.00174
11.7737	-0.00113			11.7767	0.00173
11.7821	-0.00113			11.7851	0.00172
11.7906	-0.00113			11.7935	0.00171
11.799	-0.00113			11.8019	0.0017
11.8074	-0.00112			11.8103	0.00169
11.8158	-0.00112			11.8188	0.00168
11.8242	-0.00111			11.8272	0.00167
11.8326	-0.0011			11.8356	0.00166
11.8411	-0.00109			11.844	0.00166
11.8495	-0.00108			11.8524	0.00165
11.8579	-0.00108			11.8608	0.00164
11.8663	-0.00107			11.8693	0.00163
11.8747	-0.00106			11.8777	0.00163
11.8832	-0.00105			11.8861	0.00162
11.8916	-0.00104			11.8945	0.00161
11.9	-0.00103			11.9029	0.0016
11.9084	-0.00102			11.9114	0.00159
11.9168	-0.00101			11.9198	0.00158
11.9252	-0.001			11.9282	0.00157
11.9337	-0.000995946			11.9366	0.00156
11.9421	-0.000990874			11.945	0.00155
11.9505	-0.000986939			11.9534	0.00154
11.9589	-0.000984097			11.9619	0.00153
11.9673	-0.000982291			11.9703	0.00152
11.9757	-0.000981522			11.9787	0.00151
11.9841	-0.000981912			11.9871	0.0015
11.9926	-0.000983715			11.9955	0.00149
12.001	-0.000987224			12.0039	0.00149
12.0094	-0.000992622			12.0124	0.00148
12.0178	-0.000999905			12.0208	0.00147
12.0262	-0.00101			12.0292	0.00146
12.0347	-0.00102			12.0376	0.00145
12.0431	-0.00103			12.046	0.00145
12.0515	-0.00104			12.0544	0.00144
12.0599	-0.00106			12.0629	0.00144
12.0683	-0.00107			12.0713	0.00143
12.0767	-0.00108			12.0797	0.00143
12.0852	-0.0011			12.0881	0.00143
12.0936	-0.00112			12.0965	0.00143
12.102	-0.00113			12.105	0.00143
12.1104	-0.00115			12.1134	0.00143
12.1188	-0.00117			12.1218	0.00144
12.1273	-0.00118			12.1302	0.00144
12.1357	-0.0012			12.1386	0.00144
12.1441	-0.00122			12.147	0.00145
12.1525	-0.00123			12.1555	0.00145
12.1609	-0.00125			12.1639	0.00145
12.1693	-0.00126			12.1723	0.00146
12.1777	-0.00128			12.1807	0.00146
12.1862	-0.00129			12.1891	0.00146
12.1946	-0.0013			12.1975	0.00146
12.203	-0.00132			12.206	0.00146
12.2114	-0.00133			12.2144	0.00146
12.2198	-0.00134			12.2228	0.00146
12.2283	-0.00135			12.2312	0.00146
12.2367	-0.00137			12.2396	0.00145
12.2451	-0.00137			12.248	0.00145
12.2535	-0.00138			12.2565	0.00144
12.2619	-0.00139			12.2649	0.00143
12.2703	-0.0014			12.2733	0.00142
12.2788	-0.00141			12.2817	0.00141
12.2872	-0.00141			12.2901	0.00139
12.2956	-0.00142			12.2986	0.00138
12.304	-0.00143			12.307	0.00137
12.3124	-0.00144			12.3154	0.00135
12.3209	-0.00144			12.3238	0.00134
12.3293	-0.00145			12.3322	0.00132
12.3377	-0.00145			12.3406	0.00131
12.3461	-0.00146			12.3491	0.00129
12.3545	-0.00147			12.3575	0.00128
12.3629	-0.00147			12.3659	0.00127
12.3713	-0.00148			12.3743	0.00125
12.3798	-0.00148			12.3827	0.00124
12.3882	-0.00149			12.3911	0.00123
12.3966	-0.00149			12.3996	0.00122
12.405	-0.00149			12.408	0.00121
12.4134	-0.0015			12.4164	0.0012
12.4218	-0.0015			12.4248	0.00119
12.4303	-0.00151			12.4332	0.00118
12.4387	-0.00151			12.4416	0.00117
12.4471	-0.00149			12.4501	0.00115
12.4555	-0.00145			12.4585	0.00111
12.4639	-0.00137			12.4669	0.00105
12.4724	-0.00126			12.4753	0.000962875
12.4808	-0.00112			12.4837	0.000859431
12.4892	-0.000984815			12.4922	0.000753077
12.4976	-0.000854501			12.5006	0.000653279
