# Supplementary material for: Structural basis of host recognition and biofilm formation by Salmonella Saf pili
Source: eLife. 2017 Nov 10;6:e28619. doi: 10.7554/eLife.28619 (PMC5700814; doi:10.7554/eLife.28619)
Supplement: Figure 7—source data 1. — The average number of colony formation for WT Saf pili and mutants (three replicates). [file elife-28619-fig7-data1.xlsx]

## Sheet: Sheet1
	colony numbers
	Vector	WT	T7A/R9A/N94A	E8A/Q10A	P20A	P20K	ΔSafA
Case 1	0	24	13	13	6	3	0
Case 2	0	29	9	7	8	1	1
Case 3	0	20	12	6	9	5	2
Mean	0	24.3333	11.3333	8.66667	7.66667	3	1
S.E	0	4.50925	2.08167	3.78594	1.52753	2	1
