# Supplementary material for: Structural basis of host recognition and biofilm formation by Salmonella Saf pili
Source: eLife. 2017 Nov 10;6:e28619. doi: 10.7554/eLife.28619 (PMC5700814; doi:10.7554/eLife.28619)
Supplement: Figure 7—source data 2. — The biofilm formation acitivties of Saf pili and mutant quantified by OD570 absorance values (three replicates). For the purpose of comparison, the self-associating/biofilm-formation activities of mutants were normalized against WT and showed in percentage values. [file elife-28619-fig7-data2.xlsx]

## Sheet: Sheet1
	Biofilm (% of WT)
	Vector	WT	T7A	R9A	N94A	T7A/R9A/N94A	E8A	Q10A	E8A/Q10A	P20K
Case 1	6.40977	103.93	63.9696	63.0286	99.1371	43.8126	90.4391	71.0022	38.0169	58.1429
Case 2	7.682	93.2045	57.5377	78.8167	94.7506	55.6691	80.703	55.1832	53.1467	48.7778
Case 3	12.6252	89.613	87.2143	68.1043	69.8051	63.1832	71.4042	79.3822	41.1135	50.6464
Mean	8.90564	95.5825	69.5739	69.9832	87.8976	54.2216	80.8488	68.5225	44.0924	52.5224
S.E	2.68089	6.08199	12.7471	6.58096	12.9181	7.974	7.77166	10.0336	6.52602	4.04685
