# Supplementary figures and images for: Structural basis of host recognition and biofilm formation by Salmonella Saf pili
Source: eLife journal article supplement (doi:10.7554/elife.28619), 2017-11-10

Figure 7-figure supplement 1 Zeng et al, 2017

A

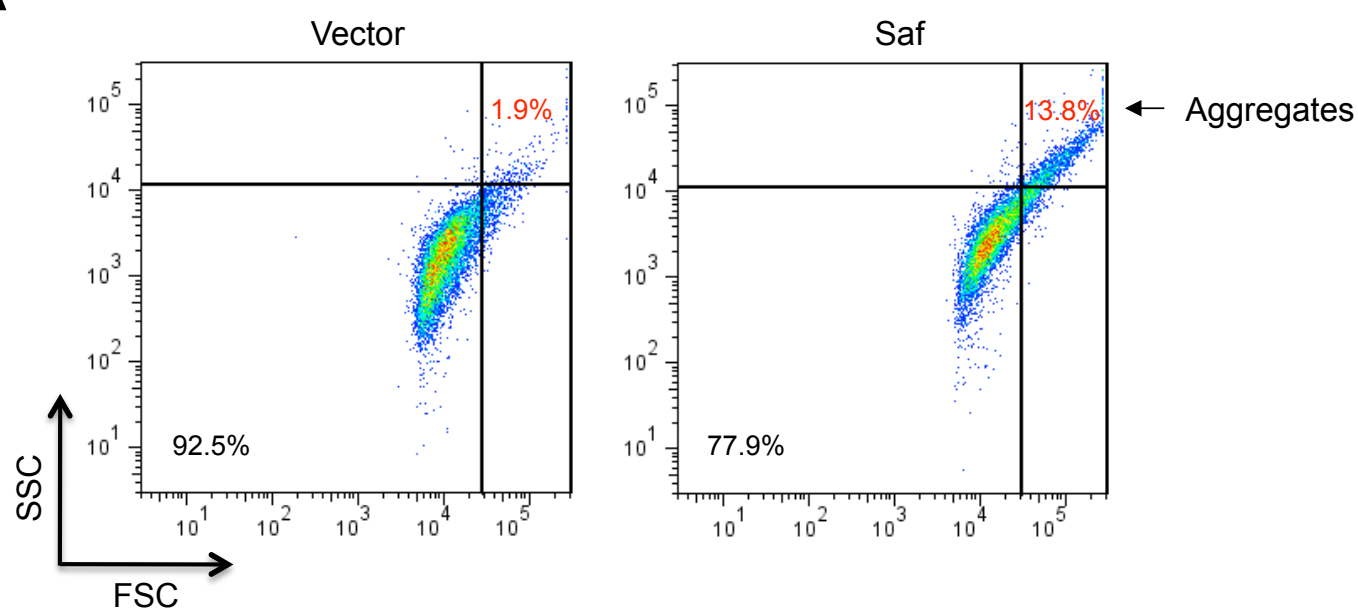

B

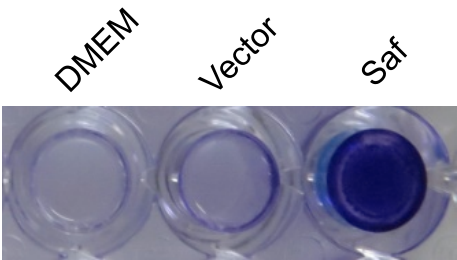

Supplement: supp [file elife-28619-supp-v1.zip]

Figure 1-figure supplement 1 Zeng et al, 2017

A

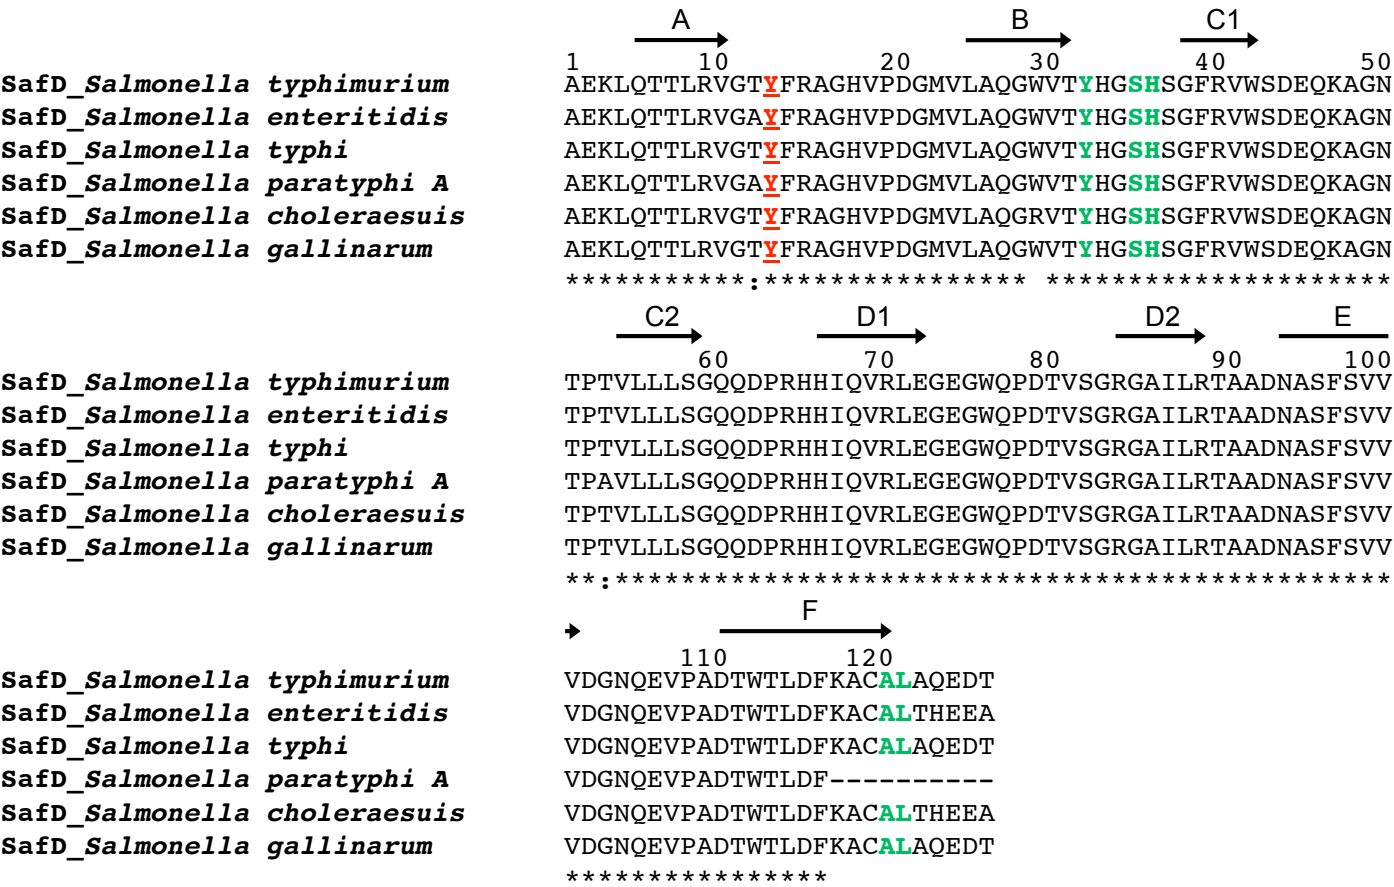

B

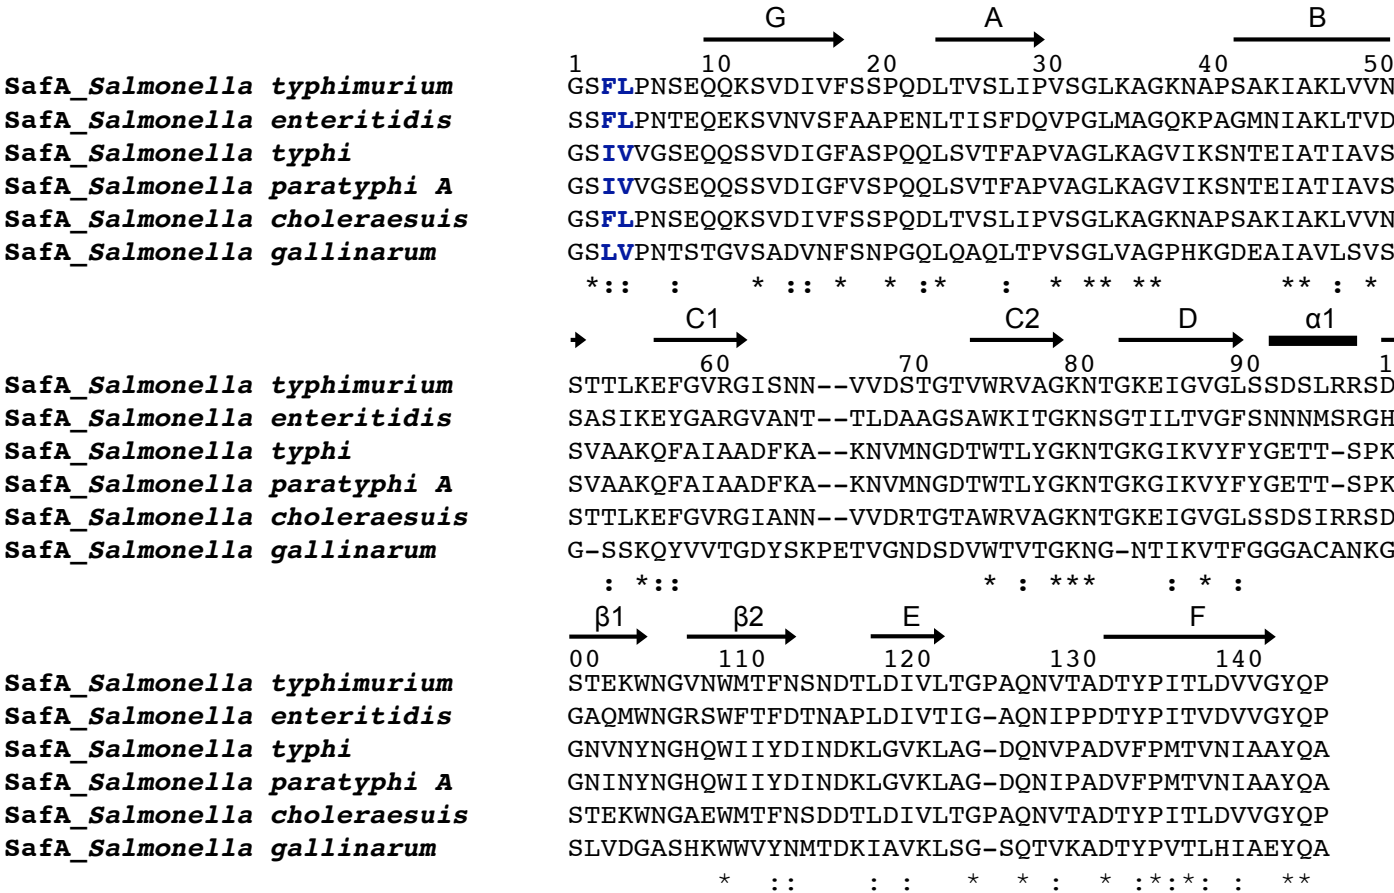

Supplement: supp [file elife-28619-supp-v1.zip]

Figure 5-figure supplement 1    Zeng et al, 2017

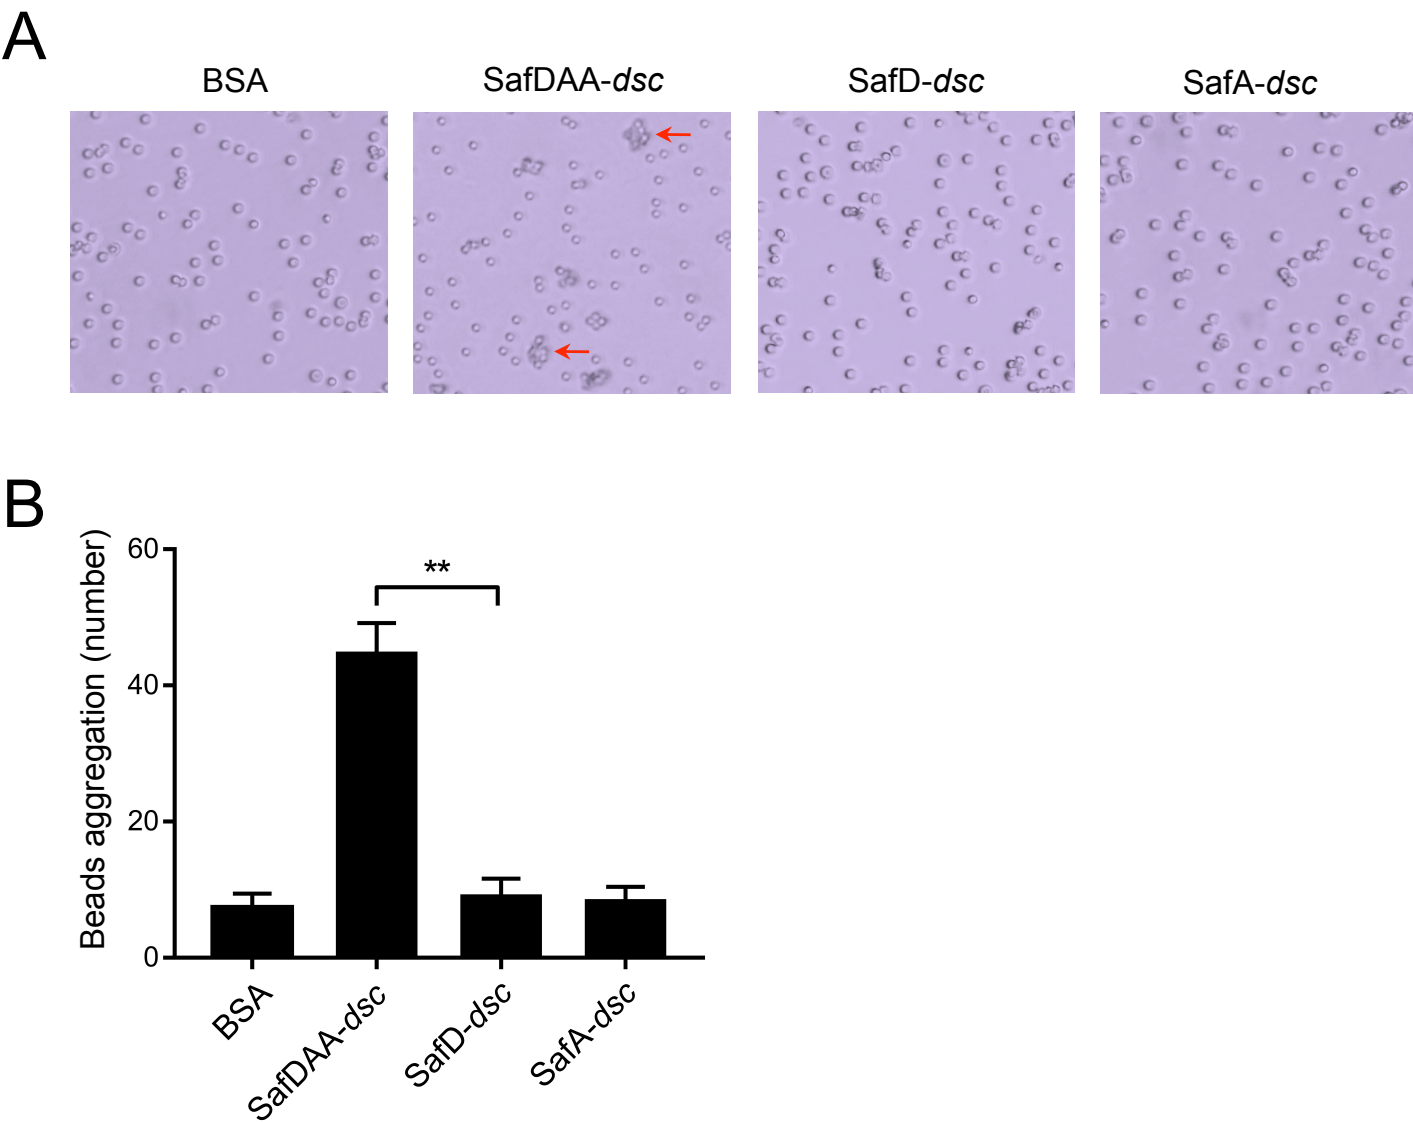

Supplement: supp [file elife-28619-supp-v1.zip]

Figure 3-figure supplement 1 Zeng et al, 2017

A

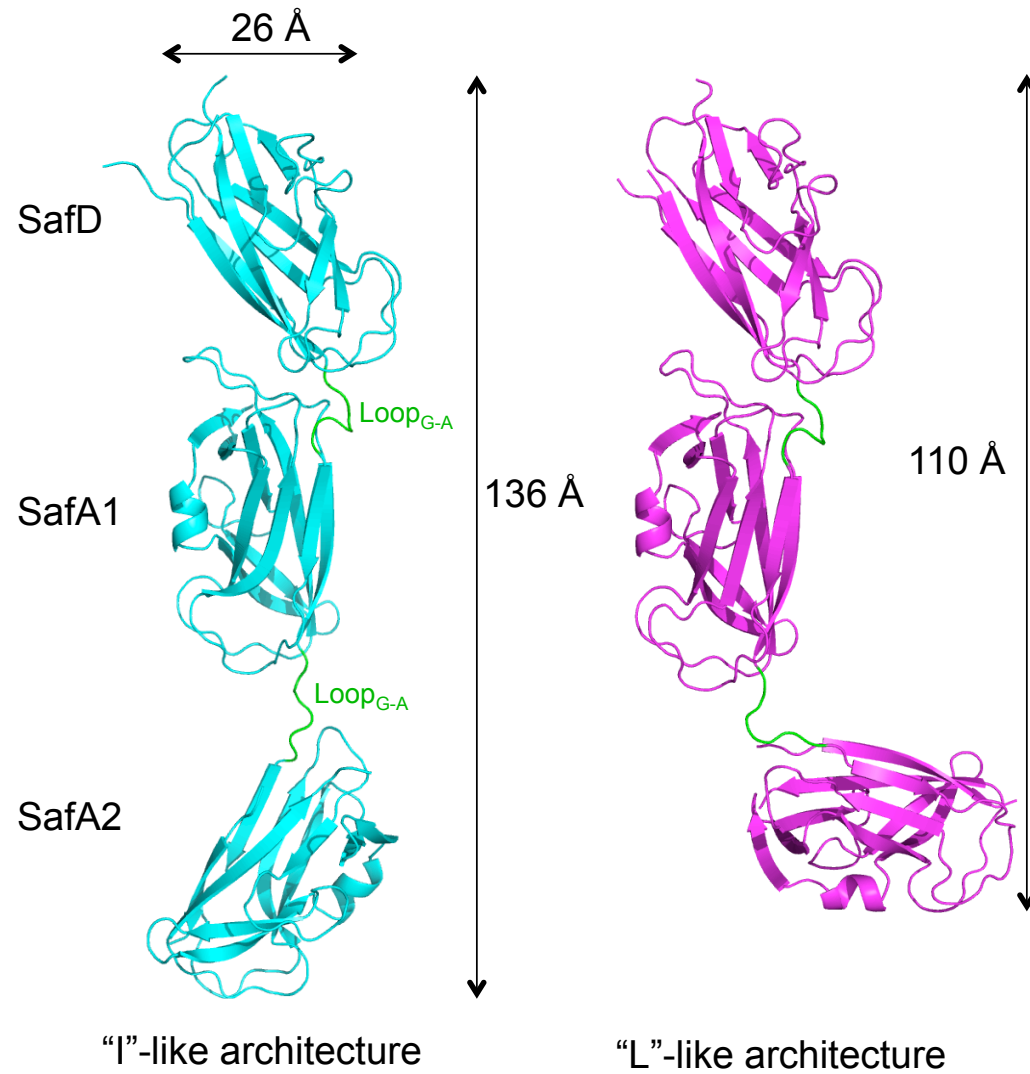

B

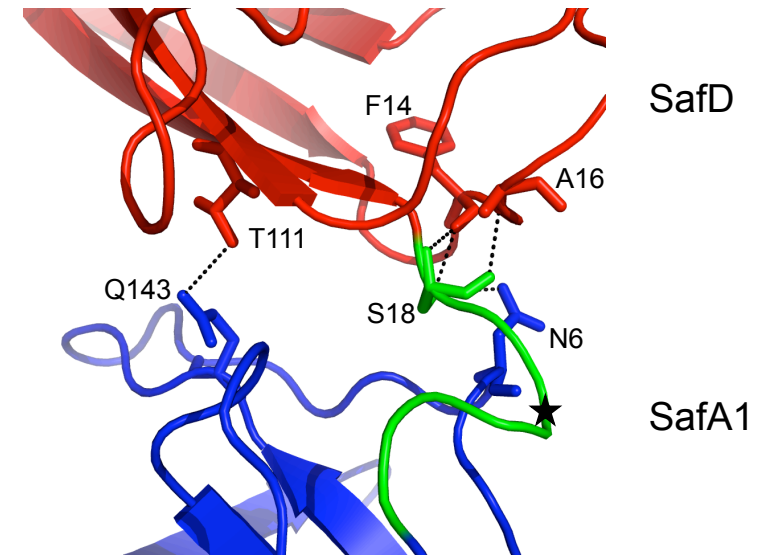

C

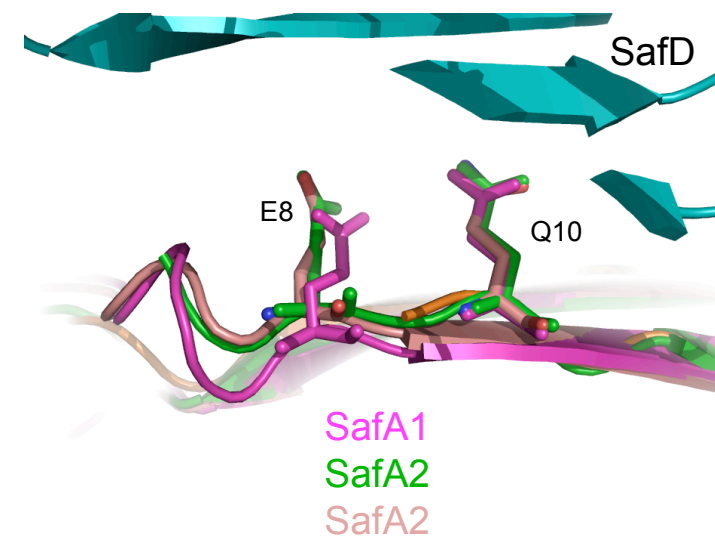

Supplement: supp [file elife-28619-supp-v1.zip]

Figure 2-figure supplement 1 Zeng et al, 2017

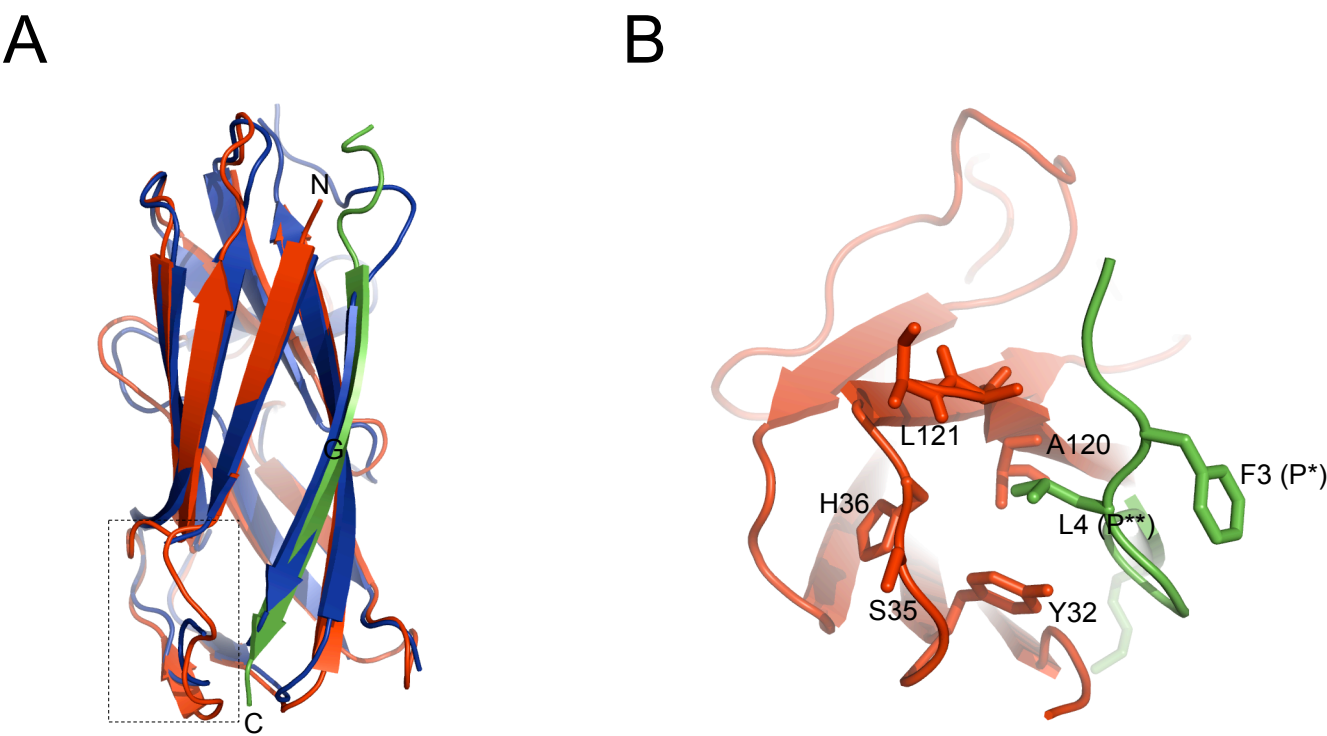

Supplement: supp [file elife-28619-supp-v1.zip]
